# Supplementary material for: Disease Duration Influences Gene Expression in Neuromelanin-Positive Cells From Parkinson’s Disease Patients
Source: Front Mol Neurosci. 2021 Nov 11;14:763777. doi: 10.3389/fnmol.2021.763777 (PMC8632647; doi:10.3389/fnmol.2021.763777)
Supplement: Supplementary file 4 [file Table_4.XLSX]

## Sheet: padj<0.05 RPKMcontrol>1 FC>1.5
ensemblID.	refseq.Name	baseMean	log2FoldChange	lfcSE	stat	pvalue	padj	txID.	biotype.consensus.	Control_RPKM_AVERAGE
ENSG00000256618	MTRNR2L1	1745.17702067594	4.37355	0.266622131204411	16.4035566245861	1.80362509259339e-60	3.76038e-56	ENST00000540040	protein_coding	10.6799
ENSG00000215049	PRDX2P1	4.13896704776389	1.86672	0.241487757472527	7.73008282056091	1.07476637874151e-14	3.20111e-11	ENST00000450181	pseduogene	1.66782
ENSG00000213177	PRDX2P4	4.05775461146112	1.59723	0.200819317708553	7.95356296864019	1.81222603380055e-15	7.55662e-12	ENST00000447134	pseduogene	2.14141
ENSG00000226415	TPI1P1	30.7064633251929	1.58276	0.20346655767157	7.77896541281799	7.31200476947887e-15	2.5408e-11	ENST00000420977	pseduogene	23.7788
ENSG00000228232	GAPDHP1	10.0925726254333	1.5484	0.220241466527824	7.03045096094156	2.05867071236772e-12	2.52478e-09	ENST00000452570	pseduogene	3.33169
ENSG00000235587	GAPDHP65	15.6401715650256	1.52385	0.210336326404693	7.24480468125251	4.33062835977574e-13	6.01928e-10	ENST00000425487	pseduogene	5.92134
ENSG00000260490	RP11-265N6.3	3.04490743407859	1.49837	0.256156001344952	5.84943573584317	4.93243402960954e-09	1.68584e-06	ENST00000569826	pseduogene	1.67708
ENSG00000218582	GAPDHP63	5.21696890646018	1.47185	0.215012721262571	6.8453926149405	7.62664113613442e-12	8.83377e-09	ENST00000405405	pseduogene	1.63281
ENSG00000271198	VDAC3P1	5.59761200628771	1.40319	0.241471143472395	5.81101220334048	6.20962363546925e-09	1.96595e-06	ENST00000604654	pseduogene	2.06667
ENSG00000232472	EEF1B2P3	3.29057315350509	1.38881	0.236126635284861	5.88165276464928	4.06189801162438e-09	1.43866e-06	ENST00000447718	pseduogene	3.53271
ENSG00000271180	RP11-665C16.8	5.48153776177099	1.36599	0.187518873990641	7.28456462760551	3.22710749431814e-13	5.17554e-10	ENST00000605294	pseduogene	4.2139
ENSG00000259918	NDUFA5P11	1.38759684759317	1.3461	0.264412166950014	5.090919315655	3.56331639598401e-07	4.7712e-05	ENST00000567995	pseduogene	1.23165
ENSG00000167815	PRDX2	289.744445235668	1.34292	0.150130530382929	8.94498790834785	3.71990476542414e-19	2.58521e-15	ENST00000301522+ENST00000334482+ENST00000466174+ENST00000498785+ENST00000478908+ENST00000477555+ENST00000435703	protein_coding	157.356
ENSG00000125347	IRF1	8.54098236508787	1.30048	0.275140527621246	4.72660235049967	2.28307738891464e-06	0.00020786	ENST00000245414+ENST00000472045+ENST00000405885+ENST00000437654+ENST00000459982+ENST00000458069+ENST00000463784+ENST00000439555+ENST00000476613+ENST00000493208	protein_coding	1.05121
ENSG00000255823	MTRNR2L8	79.4583536272902	1.28684	0.224808147047391	5.7241873365546	1.03930018707283e-08	2.88912e-06	ENST00000536684	protein_coding	26.7255
ENSG00000219375	RP11-69L16.3	5.67618926951245	1.27661	0.173621074454382	7.35287128932077	1.93993723744903e-13	3.37048e-10	ENST00000404326	pseduogene	5.52861
ENSG00000251333	RTN3P1	5.28345513704486	1.27624	0.253840259330274	5.02770992716311	4.96371962901863e-07	6.23425e-05	ENST00000536295	pseduogene	3.25674
ENSG00000233662	CALM2P4	2.13199306995147	1.26465	0.224391643985959	5.63592544403296	1.74120703797683e-08	4.32172e-06	ENST00000430810	pseduogene	1.80353
ENSG00000008517	IL32	6.71193025164586	1.25683	0.273691137011342	4.59215367452085	4.38695131572312e-06	0.00034777	ENST00000325568+ENST00000534507+ENST00000396887+ENST00000531965+ENST00000532086+ENST00000529699+ENST00000440815+ENST00000526464+ENST00000529550+ENST00000551122+ENST00000525643+ENST00000548807+ENST00000528163+ENST00000444393+ENST00000530890+ENST00000533097+ENST00000008180+ENST00000534748+ENST00000396890+ENST00000532247+ENST00000548652+ENST00000525228+ENST00000525377+ENST00000530538+ENST00000549213…	protein_coding	2.26973
ENSG00000229097	CALM2P2	13.0036230086017	1.21021	0.192515236549104	6.28629250185867	3.25137087983245e-10	1.9368e-07	ENST00000428512	pseduogene	13.4751
ENSG00000123416	TUBA1B	15.6319636162443	1.19577	0.238323780000189	5.01743833773703	5.23650003930838e-07	6.49856e-05	ENST00000336023+ENST00000332858+ENST00000547765+ENST00000550367+ENST00000551324+ENST00000549870+ENST00000547476+ENST00000552984	protein_coding	24.0071
ENSG00000256210	AC005255.3	0.710504582711387	1.18546	0.276088330741173	4.29378588833058	1.75651877910288e-05	0.0010316	ENST00000510342+ENST00000593748	pseduogene	1.00057
ENSG00000249489	GAPDHP70	4.01734408144119	1.18213	0.225654059702779	5.23868997923832	1.61720443062664e-07	2.52198e-05	ENST00000515281	pseduogene	1.45904
ENSG00000258111	RP11-43D4.2	2.02941254719269	1.17092	0.205133903075032	5.70808868545503	1.14251888379547e-08	3.01524e-06	ENST00000548397	pseduogene	1.82028
ENSG00000111640	GAPDH	291.612186641184	1.14547	0.176238078866554	6.49954242634975	8.05646790896646e-11	6.17893e-08	ENST00000229239+ENST00000496049+ENST00000396856+ENST00000492719+ENST00000396861+ENST00000474249+ENST00000396859+ENST00000466588+ENST00000466525+ENST00000396858	protein_coding	152.312
ENSG00000235084	CHCHD2P6	2.15064931097159	1.13991	0.242042578478835	4.70953886938566	2.48277864776463e-06	0.00022027	ENST00000420030+ENST00000454346	pseduogene	3.65106
ENSG00000123562	MORF4L2	6.99170944673826	1.12133	0.238838611783146	4.69494726419489	2.66675512883894e-06	0.00023361	ENST00000360458+ENST00000451301+ENST00000422154+ENST00000433176+ENST00000423833+ENST00000441076+ENST00000434230+ENST00000418819+ENST00000442614+ENST00000492116+ENST00000422355+ENST00000474653+ENST00000498064+ENST00000467755+ENST00000488331	protein_coding	4.42088
ENSG00000213478	CFL1P2	3.39080904787973	1.11757	0.201373804802206	5.54971590614133	2.86134184219595e-08	6.42931e-06	ENST00000440986	pseduogene	2.08008
ENSG00000171471	MAP1LC3B2	5.83672429661156	1.1162	0.207678340696083	5.3746664692903	7.67245701387552e-08	1.37899e-05	ENST00000306985+ENST00000556529	protein_coding	5.99273
ENSG00000198618	PPIAP22	12.8434903579495	1.10702	0.205960716977301	5.37490778277755	7.66218870113747e-08	1.37899e-05	ENST00000394336+ENST00000358455	pseduogene	87.181
ENSG00000172974	AC007318.5	14.603960322742	1.09446	0.24127994873124	4.53606624627568	5.73131841692327e-06	0.000440931	ENST00000393177+ENST00000467568	pseduogene	32.2801
ENSG00000214391	RP11-121L10.3	7.85320008680793	1.08999	0.189857289663333	5.74107929480099	9.40750241670452e-09	2.6505e-06	ENST00000530835	pseduogene	2.50431
ENSG00000225183	RP4-758J24.4	0.79055881806851	1.08118	0.235948818203103	4.58228111389027	4.59931029560657e-06	0.000361853	ENST00000444055	pseduogene	1.40641
ENSG00000253785	CTC-308K20.3	10.8443395041584	1.08067	0.192897735710147	5.60228139780831	2.11548748047768e-08	5.01202e-06	ENST00000523057	pseduogene	5.44798
ENSG00000234608	MAPKAPK5-AS1	8.72216734530619	1.06582	0.192530750547546	5.53584950787447	3.09723428594447e-08	6.72648e-06	ENST00000443596+ENST00000456429+ENST00000428207+ENST00000442119+ENST00000590479+ENST00000609228+ENST00000609983	lincRNA	17.9299
ENSG00000177855	CACYBPP2	11.0830177378057	1.06179	0.256141647632309	4.14532145304499	3.3933732731706e-05	0.00170068	ENST00000453625	pseduogene	13.2562
ENSG00000217416	ISCA1P1	0.367390725598367	1.05635	0.2754367837761	3.83518562629475	0.000125469498093394	0.00436433	ENST00000542811+ENST00000426679	pseduogene	1.30286
ENSG00000205579	DYNLL1P1	1.325497336312	1.05393	0.213151005305101	4.94451185983007	7.63348946148914e-07	8.8911e-05	ENST00000380761+ENST00000595442	pseduogene	2.62885
ENSG00000226138	RP1-228P16.7	3.97198263621455	1.05254	0.199531433213213	5.27503817184695	1.3272845757109e-07	2.12866e-05	ENST00000419998+ENST00000549557	pseduogene	4.75828
ENSG00000215482	CALM2P3	5.68131841008264	1.05234	0.18151855511127	5.79741433285228	6.73451624097131e-09	2.00583e-06	ENST00000400429	pseduogene	5.07536
ENSG00000205794	RP11-333E13.4	5.04174218114898	1.05211	0.243185138986397	4.32635635014195	1.51596104066202e-05	0.000916124	ENST00000381811+ENST00000507914	uncertain	2.11183
ENSG00000251259	AC004069.2	1.54736006445092	1.05158	0.260772213489736	4.0325637631058	5.51716385145116e-05	0.00244219	ENST00000504082	lincRNA	1.5572
ENSG00000254612	RP11-676M6.1	3.57476781384966	1.04811	0.25689415809446	4.07994356666732	4.50466354532345e-05	0.00210107	ENST00000526843	pseduogene	2.68938
ENSG00000231531	HINT1P1	4.95399482694961	1.04775	0.168911371324882	6.20293184383207	5.54208453915257e-10	2.82917e-07	ENST00000602049+ENST00000464866	pseduogene	5.62111
ENSG00000270532	PEBP1P2	2.68917234816955	1.04242	0.2653824268597	3.92800894428573	8.56520262989263e-05	0.00327662	ENST00000603980	pseduogene	1.71946
ENSG00000257605	RP11-680A11.5	1.6800813224049	1.04189	0.260656108422214	3.99718374598469	6.41005442541993e-05	0.00267869	ENST00000550263	antisense	1.22659
ENSG00000237350	CDC42P6	5.30258199752319	1.0405	0.245861896678058	4.23204096363223	2.3158021670649e-05	0.00128069	ENST00000421246	pseduogene	7.56314
ENSG00000168952	STXBP6	26.7526165331557	1.03719	0.23659015424398	4.38391805184417	1.16563636344752e-05	0.000752395	ENST00000548724+ENST00000396700+ENST00000323944+ENST00000419632+ENST00000546511+ENST00000550887+ENST00000548369+ENST00000548182+ENST00000358326	protein_coding	2.43037
ENSG00000254023	PKMP4	0.78325782802607	1.02935	0.250529792448367	4.10869774001442	3.97896434139951e-05	0.00192031	ENST00000523134	pseduogene	1.0489
ENSG00000139187	KLRG1	9.09946283841619	1.01033	0.253055171687793	3.99253191155747	6.53715322153096e-05	0.00270216	ENST00000539240+ENST00000544226+ENST00000538029+ENST00000541957+ENST00000356986+ENST00000266551+ENST00000543895	protein_coding	2.70257
ENSG00000168209	DDIT4	12.9814720098033	1.00366	0.205744373471246	4.87818504159881	1.07066458762724e-06	0.000114635	ENST00000307365+ENST00000473155+ENST00000471240	protein_coding	4.75126
ENSG00000233648	AC010095.6	4.23924351473867	0.992262	0.158897043367729	6.24468664627235	4.24650571934008e-10	2.45932e-07	ENST00000443543	pseduogene	13.6485
ENSG00000229132	EIF4A1P10	1.81525987277687	0.988563	0.259344620965977	3.81177473211023	0.000137972590948767	0.004685	ENST00000428832	pseduogene	1.01436
ENSG00000182952	HMGN4	3.04259040620165	0.981349	0.272635402767732	3.59949260506608	0.000318838699634748	0.00870087	ENST00000377575+ENST00000477243	protein_coding	1.56795
ENSG00000226015	CCT8P1	4.90621037312538	0.960374	0.257940464517159	3.72323820811982	0.000196683790678022	0.00611581	ENST00000413611	pseduogene	1.42466
ENSG00000236281	AC093106.5	4.15746580270386	0.954082	0.183357505206745	5.20339963658219	1.956754492362e-07	2.95626e-05	ENST00000431248	pseduogene	3.63725
ENSG00000120437	ACAT2	6.2362878661549	0.953665	0.273010604471269	3.49314319887201	0.000477370445991712	0.0114006	ENST00000367048+ENST00000541436+ENST00000467951+ENST00000472052	protein_coding	2.30592
ENSG00000241547	RP11-4K3__A.5	2.78071353939766	0.952383	0.2389496822898	3.9857062909606	6.72796943399548e-05	0.00275582	ENST00000486001	pseduogene	2.73091
ENSG00000270672	MTRNR2L6	7.70073456065007	0.951707	0.241985229706824	3.9329136117553	8.3922404491982e-05	0.00322823	ENST00000604952	protein_coding	1.74035
ENSG00000048162	NOP16	28.5108360613613	0.943331	0.162095720827481	5.81959072979592	5.89918951879961e-09	1.92175e-06	ENST00000389158+ENST00000510123+ENST00000507413+ENST00000502663+ENST00000503849+ENST00000504821+ENST00000509257+ENST00000502577+ENST00000510608	protein_coding	28.4446
ENSG00000248785	HIGD1AP14	1.46181544159961	0.921599	0.254681841689783	3.61862772416841	0.000296169320297705	0.00828837	ENST00000507617	pseduogene	3.21851
ENSG00000235282	RP1-8B22.1	1.13369433985257	0.920768	0.213744390911168	4.30780116146728	1.64885507577997e-05	0.000979401	ENST00000441355+ENST00000596113	pseduogene	1.51435
ENSG00000267809	NDUFV2P1	36.0012732261973	0.918302	0.139571589501339	6.57943283198014	4.72246181613177e-11	4.28081e-08	ENST00000596415	pseduogene	25.3179
ENSG00000171103	TRMT61B	3.63648382324211	0.918284	0.209391867151178	4.3854817575766	1.15729357242129e-05	0.000752395	ENST00000306108+ENST00000419999+ENST00000439947+ENST00000490390+ENST00000484060	protein_coding	5.69959
ENSG00000100462	PRMT5	3.46291503797457	0.918252	0.275743481754763	3.33009372549781	0.000868167556115138	0.0173376	ENST00000324366+ENST00000397441+ENST00000397440+ENST00000476175+ENST00000557443+ENST00000216350+ENST00000454731+ENST00000538452+ENST00000553915+ENST00000553897+ENST00000557758+ENST00000555454+ENST00000553502+ENST00000555530+ENST00000556043+ENST00000553550+ENST00000554716+ENST00000553787+ENST00000553641+ENST00000554867+ENST00000557415+ENST00000556616+ENST00000554910+ENST00000553417+ENST00000421938…	protein_coding	4.36308
ENSG00000259385	RP11-605F22.1	0.258877606596453	0.907794	0.272733820454715	3.32849690351571	0.000873159756367606	0.0174039	ENST00000559875	antisense	15.0136
ENSG00000137960	GIPC2	3.66627858721917	0.905949	0.26824284079817	3.37734745230455	0.000731885365570267	0.0154914	ENST00000476882+ENST00000370759	protein_coding	1.02276
ENSG00000265478	CTD-2145A24.3	2.54139292506617	0.904944	0.273423357718434	3.30968035194925	0.000934025706797564	0.018253	ENST00000584957	lincRNA	1.31341
ENSG00000231234	SKP1P1	11.0431331623625	0.904723	0.171234675330371	5.28352463892892	1.26721811427472e-07	2.06408e-05	ENST00000438081+ENST00000433793	pseduogene	11.7689
ENSG00000128564	VGF	24.8364768440947	0.900434	0.225423057847223	3.99441977758033	6.48528746505489e-05	0.00269346	ENST00000249330+ENST00000445482	protein_coding	4.15004
ENSG00000234106	RP11-288E14.2	12.224729794593	0.893058	0.183910301261966	4.85594103292559	1.1981635591347e-06	0.000123666	ENST00000533701	pseduogene	17.7484
ENSG00000213684	LDHBP2	11.2320074773011	0.892291	0.183716718356555	4.85688381078892	1.19247518396602e-06	0.000123666	ENST00000456969	pseduogene	4.93556
ENSG00000214552	COPS8P2	1.83413800480259	0.888755	0.2755550469545	3.22532689522583	0.00125828903953309	0.022384	ENST00000473228	pseduogene	1.18307
ENSG00000231468	PRDX3P2	3.7795765018723	0.888013	0.216748340773214	4.09697779244127	4.18579040553561e-05	0.00199246	ENST00000447051	pseduogene	2.27201
ENSG00000196126	HLA-DRB1	11.0441061974404	0.881399	0.274951301960549	3.20565471117688	0.00134755583810634	0.0235303	ENST00000360004	protein_coding	3.73871
ENSG00000250472	TRIM36-IT1	3.75936210603959	0.881137	0.254860803674816	3.45732681802193	0.000545562774582728	0.012404	ENST00000503723	sense_intronic	1.57481
ENSG00000236152	MRPS36P1	3.48007520077962	0.880873	0.256309110474916	3.43675925441446	0.000588718630927618	0.0130995	ENST00000421291	pseduogene	6.61461
ENSG00000259079	RP1-261D10.1	1.90688262640667	0.879373	0.269169515511668	3.26698714343141	0.00108698616631022	0.0201984	ENST00000554427	pseduogene	1.82868
ENSG00000242364	RP11-451J24.1	1.5494878056479	0.87797	0.221819459434715	3.95804084013659	7.55670391966024e-05	0.00299524	ENST00000495472	pseduogene	1.81483
ENSG00000230207	RPL4P5	3.50290381564735	0.872957	0.231065367412993	3.77796593811419	0.000158114497884699	0.00520593	ENST00000413888	pseduogene	1.53147
ENSG00000101473	ACOT8	34.762589017327	0.872048	0.174369461777679	5.00115258766496	5.69885851647812e-07	6.83459e-05	ENST00000217455+ENST00000461272+ENST00000488679+ENST00000493118+ENST00000484975+ENST00000483141+ENST00000487205+ENST00000484783+ENST00000486165+ENST00000481938+ENST00000457981+ENST00000426915	protein_coding	13.4746
ENSG00000186288	PABPC1L2A	6.68601534419881	0.871343	0.25791682718883	3.37838723531244	0.000729123289643947	0.0154487	ENST00000373519+ENST00000453389	protein_coding	3.37637
ENSG00000212802	RPL15P3	5.94301056076799	0.868017	0.173234065982869	5.0106579496514	5.42442551669442e-07	6.69194e-05	ENST00000450992+ENST00000391491	pseduogene	17.3377
ENSG00000110063	DCPS	3.55761137462596	0.867986	0.273322847680192	3.17568066260019	0.0014948540774262	0.0254418	ENST00000263579+ENST00000530860+ENST00000529149	protein_coding	1.832
ENSG00000134363	FST	29.3605388755374	0.866567	0.218576292516238	3.96459963150079	7.35192360194798e-05	0.00293962	ENST00000256759+ENST00000396947+ENST00000491717+ENST00000504226+ENST00000497789	protein_coding	10.9513
ENSG00000216657	RP3-406P24.1	3.31691218361501	0.866405	0.21045762201052	4.1167681823063	3.84222187026104e-05	0.00188486	ENST00000405027	pseduogene	1.58388
ENSG00000167085	PHB	8.24570407854526	0.86602	0.25973780448908	3.33420791115584	0.000855426909133178	0.0171819	ENST00000300408+ENST00000511832+ENST00000511933+ENST00000419140+ENST00000504124+ENST00000508009+ENST00000512041+ENST00000446735+ENST00000393345+ENST00000506273+ENST00000434917+ENST00000507748+ENST00000513412	protein_coding	6.34907
ENSG00000235993	AC007559.1	0.746915765379025	0.865008	0.250349603989232	3.45520074223456	0.000549883244857024	0.0124886	ENST00000428736	pseduogene	1.00487
ENSG00000213383	AC104297.1	6.49216394857706	0.859013	0.171769006325021	5.00098022207222	5.7039564446498e-07	6.83459e-05	ENST00000393779	pseduogene	3.6051
ENSG00000248648	RP11-485M7.1	11.6195639134315	0.856204	0.165377634308159	5.17726399378418	2.25163501573242e-07	3.32939e-05	ENST00000505029	pseduogene	20.7666
ENSG00000231841	RP11-206F17.2	1.440061557467	0.853781	0.247515735940942	3.44940227216997	0.000561829053487105	0.0126985	ENST00000414628	pseduogene	1.04327
ENSG00000162377	COA7	6.46333079774976	0.853506	0.246102775680108	3.46808764686811	0.000524176296756532	0.0120674	ENST00000371538+ENST00000486918	protein_coding	1.58052
ENSG00000228236	TXNP5	6.76982038830208	0.848957	0.177729696640064	4.77667286932934	1.7821934772305e-06	0.000169666	ENST00000441043	pseduogene	11.0665
ENSG00000115286	NDUFS7	43.5480761336085	0.842725	0.187182056837473	4.50216791181531	6.72638056908577e-06	0.000492064	ENST00000546283+ENST00000233627+ENST00000545446+ENST00000543289+ENST00000539480+ENST00000538662+ENST00000313408+ENST00000436115+ENST00000534853+ENST00000546172+ENST00000414651+ENST00000538929+ENST00000538523+ENST00000540530+ENST00000535382+ENST00000539882+ENST00000591358	protein_coding	35.5968
ENSG00000229184	RP11-255J3.3	3.74088102924307	0.84	0.224479330725784	3.74199354376887	0.000182566206792577	0.00578469	ENST00000433885	pseduogene	3.46801
ENSG00000249353	NPM1P27	3.52759210472601	0.835689	0.248498907766123	3.36294864841804	0.000771147069935104	0.0160456	ENST00000502784	pseduogene	4.02271
ENSG00000150753	CCT5	48.787426714256	0.830131	0.165887578252327	5.00417645760076	5.61013502146828e-07	6.80033e-05	ENST00000280326+ENST00000503026+ENST00000515390+ENST00000511700+ENST00000508451+ENST00000423695+ENST00000512975+ENST00000510326+ENST00000503454+ENST00000515676+ENST00000506600+ENST00000514674+ENST00000509846+ENST00000511995	protein_coding	19.4511
ENSG00000234213	FHP1	1.04659733882538	0.828996	0.269603396163558	3.07487318508479	0.00210592076174093	0.0317472	ENST00000442741	pseduogene	1.19605
ENSG00000233337	UBE2FP3	0.688982155470733	0.828366	0.256056408289731	3.23509240349666	0.00121603369527345	0.0218561	ENST00000436366	pseduogene	1.47123
ENSG00000258981	COX5AP2	2.149826072885	0.826594	0.186930626443983	4.42192689326161	9.78245585142703e-06	0.000666518	ENST00000554418	pseduogene	2.16589
ENSG00000227203	SUB1P1	2.29848432933707	0.825566	0.212476385575079	3.88544685578861	0.000102141836209856	0.00369714	ENST00000424509+ENST00000524415	pseduogene	2.95776
ENSG00000144837	PLA1A	11.7968013046789	0.823419	0.26591407792279	3.09655987560314	0.00195780318597649	0.0304614	ENST00000273371+ENST00000488919+ENST00000495992+ENST00000472126+ENST00000494440+ENST00000475963	protein_coding	1.38832
ENSG00000232177	MTND4P24	43.9221157055286	0.8214	0.247116211173563	3.32394225988454	0.00088754569956576	0.0175753	ENST00000424002	pseduogene	48.4184
ENSG00000178741	COX5A	182.563287391235	0.82002	0.125991565433483	6.50852860668208	7.58904589839718e-11	6.08554e-08	ENST00000322347+ENST00000567270+ENST00000562233+ENST00000568783+ENST00000568517+ENST00000564811	protein_coding	126.886
ENSG00000198513	ATL1	27.2834576319381	0.817872	0.215936320193158	3.78756177190571	0.000152132869585185	0.00507491	ENST00000556478+ENST00000441560+ENST00000555960+ENST00000553509+ENST00000354525+ENST00000357032+ENST00000358385+ENST00000554886+ENST00000557735+ENST00000553746+ENST00000555266+ENST00000556067	protein_coding	19.2135
ENSG00000121769	FABP3	184.083769819498	0.815913	0.10895488437903	7.48854422581876	6.96417211897554e-14	1.61329e-10	ENST00000373713+ENST00000497275+ENST00000498148+ENST00000482018	protein_coding	118.964
ENSG00000235165	AC016405.1	2.54805603098185	0.813848	0.228150871333201	3.56714735687608	0.000360888559982422	0.00939347	ENST00000442838	pseduogene	1.30228
ENSG00000256968	SNRPEP2	1.68879090911139	0.811763	0.216147455067169	3.75559725376461	0.000172928591946582	0.00553823	ENST00000397592	pseduogene	3.909
ENSG00000213148	AC073465.1	2.04409765078442	0.810608	0.201750612219319	4.01787059303805	5.87264312934644e-05	0.00255402	ENST00000456671	pseduogene	2.15127
ENSG00000206145	P2RX6P	5.51436045475176	0.809035	0.240454594847632	3.36460508056056	0.000766532892171127	0.0159655	ENST00000439119+ENST00000450626+ENST00000382931	uncertain	5.45317
ENSG00000170365	SMAD1	9.29625777178637	0.80666	0.227205696810199	3.5503521566003	0.000384716152323902	0.00976973	ENST00000514778+ENST00000507594+ENST00000514831+ENST00000302085+ENST00000512019+ENST00000503324+ENST00000515527+ENST00000507367+ENST00000394092+ENST00000515385+ENST00000514168+ENST00000506626+ENST00000502342+ENST00000511125+ENST00000510948+ENST00000511255	protein_coding	3.03754
ENSG00000216721	AC093850.1	3.23455741217708	0.799874	0.181690306516509	4.40240222092883	1.07058843636991e-05	0.000717707	ENST00000454121	pseduogene	5.85086
ENSG00000251107	RP11-466P24.4	3.7510047993127	0.797273	0.203000584973044	3.92743984732965	8.5854884146047e-05	0.00327837	ENST00000507570	pseduogene	5.57542
ENSG00000173334	TRIB1	13.2137122325034	0.796123	0.231844233115074	3.43386867640849	0.000595032402114577	0.0132258	ENST00000311922+ENST00000520847+ENST00000521778+ENST00000519576	protein_coding	1.35602
ENSG00000115484	CCT4	47.3501946940673	0.792748	0.157643531922632	5.02874057297735	4.93711816107212e-07	6.23425e-05	ENST00000394440+ENST00000461540+ENST00000544079+ENST00000544185+ENST00000538252+ENST00000461370	protein_coding	28.2834
ENSG00000175324	LSM1	5.98682208680717	0.791489	0.266250430600096	2.97272497489137	0.00295168804425425	0.0405133	ENST00000311351+ENST00000520755+ENST00000522515+ENST00000520286+ENST00000523511	protein_coding	6.72584
ENSG00000261679	ATP5HP1	1.34368580460431	0.791378	0.226227141491	3.49815492605489	0.000468488904911268	0.0112789	ENST00000567898	pseduogene	1.42136
ENSG00000233270	SNRPEP4	2.69767395675732	0.79099	0.219017537145106	3.61153559816493	0.000304389291174395	0.00845035	ENST00000435815	pseduogene	9.63947
ENSG00000234171	RNASEH1-AS1	8.69138583311057	0.789103	0.24222610628635	3.25771246583696	0.00112314145408027	0.0207408	ENST00000438436+ENST00000426725	antisense	4.78645
ENSG00000135083	CCNJL	13.885394741212	0.787787	0.251510862698601	3.13221749996338	0.00173491298670964	0.028018	ENST00000393977+ENST00000377503+ENST00000257536+ENST00000541762+ENST00000519673+ENST00000520748+ENST00000505287+ENST00000518764+ENST00000521643	protein_coding	1.91491
ENSG00000258427	RBM8B	6.46077681853138	0.787692	0.199513026651023	3.94807201884413	7.87831064860536e-05	0.00308171	ENST00000555532	pseduogene	8.14323
ENSG00000182993	C12orf60	6.62932393090013	0.787588	0.267561266248353	2.94357882652874	0.00324441189567478	0.0432178	ENST00000330828+ENST00000533472+ENST00000527783+ENST00000543822	protein_coding	1.09311
ENSG00000236264	RPL26P30	2.75578205710942	0.787104	0.2336320768539	3.36899092543671	0.000754439126393471	0.0158242	ENST00000602923+ENST00000419125+ENST00000453533	uncertain	4.92421
ENSG00000231369	RP1-40G4P.1	1.25657036307192	0.785935	0.224960993714369	3.49364924290854	0.000476466581760833	0.011392	ENST00000422915	pseduogene	1.01687
ENSG00000214125	RP3-412A9.15	4.01515256730345	0.784694	0.196603543797471	3.99125159687149	6.57255071953741e-05	0.00270812	ENST00000397595	pseduogene	2.83651
ENSG00000229598	PRDX3P1	3.52725935662426	0.784446	0.216216495390831	3.62805773118015	0.000285561415658514	0.00807825	ENST00000418695	pseduogene	2.0021
ENSG00000128965	CHAC1	74.1608658152066	0.781443	0.18737049070794	4.17057865281457	3.03827167252178e-05	0.00156794	ENST00000444189+ENST00000446533+ENST00000487220	protein_coding	17.5416
ENSG00000273472	RP11-102N12.3	7.07471870706979	0.7804	0.241028240703508	3.23779499464659	0.00120457333785561	0.0218005	ENST00000609937	lincRNA	1.8511
ENSG00000171314	PGAM1	57.5763227830699	0.777894	0.147412866366955	5.27697298264315	1.3133524050695e-07	2.12264e-05	ENST00000334828+ENST00000473929+ENST00000467867	protein_coding	126.294
ENSG00000268412	AC013449.1	9.75199064048166	0.775134	0.189270967382535	4.09536421139903	4.21505221821509e-05	0.00199781	ENST00000599234	protein_coding	13.259
ENSG00000173545	ZNF622	41.0733553439649	0.773255	0.166051404944823	4.65672242646641	3.21283143761395e-06	0.000267937	ENST00000308683	protein_coding	11.1754
ENSG00000136235	GPNMB	19.6563247890878	0.772525	0.24467986738885	3.15728804878325	0.00159243955898106	0.0263917	ENST00000465673+ENST00000492858+ENST00000258733+ENST00000381990+ENST00000409458+ENST00000459927+ENST00000487890+ENST00000453162+ENST00000492512+ENST00000539136+ENST00000474157+ENST00000479625+ENST00000470994+ENST00000463011+ENST00000478451+ENST00000468723	protein_coding	4.74934
ENSG00000112304	ACOT13	39.3949434455598	0.771164	0.18966887499206	4.06584366293219	4.78590118596154e-05	0.00220246	ENST00000537591+ENST00000230048+ENST00000476436	protein_coding	4.87976
ENSG00000175581	MRPL48	30.0437010675864	0.770652	0.182675588821897	4.21869070273055	2.45725084954589e-05	0.00133415	ENST00000310614+ENST00000535529+ENST00000508278+ENST00000540162+ENST00000544140+ENST00000544819+ENST00000497094+ENST00000411840+ENST00000398483+ENST00000535277+ENST00000542303+ENST00000537007+ENST00000543058+ENST00000543374+ENST00000314282	protein_coding	22.1768
ENSG00000174977	AC026271.5	5.70031065758145	0.769312	0.241084655176842	3.19104375059897	0.00141759812024124	0.0246091	ENST00000447794+ENST00000308863	pseduogene	4.75849
ENSG00000184674	GSTT1	62.13593401686	0.765871	0.256424448910556	2.98673208692387	0.00281976714728012	0.039095	ENST00000248935+ENST00000417831+ENST00000436103+ENST00000417489+ENST00000458231+ENST00000426209+ENST00000439996+ENST00000417870+ENST00000418883+ENST00000480898+ENST00000428175+ENST00000447865+ENST00000486544	protein_coding	47.6557
ENSG00000236764	COX7A2P2	13.5912438828277	0.764938	0.125963670322074	6.0726856819104	1.25788517698391e-09	5.57993e-07	ENST00000505291	pseduogene	25.1644
ENSG00000260747	RP11-421N8.1	3.64011296841467	0.763557	0.229159043909734	3.33199521998685	0.000862257372155442	0.0172526	ENST00000567372	pseduogene	4.95547
ENSG00000261612	SUB1P3	6.99869808889586	0.759623	0.186038147500184	4.08315923212893	4.44275586372498e-05	0.00208151	ENST00000564581	pseduogene	10.4867
ENSG00000224906	RP1-102E24.9	1.28986860387325	0.758233	0.235827176263281	3.21520530092621	0.00130351260192664	0.0229341	ENST00000447193+ENST00000425281	pseduogene	1.93878
ENSG00000256211	RP11-1018J11.1	8.54541631773107	0.756478	0.215102661960768	3.51682340087378	0.000436744255400623	0.0107227	ENST00000444513	pseduogene	7.76562
ENSG00000263781	RP11-321A17.3	28.0567274114689	0.755727	0.153830173696511	4.91273335084581	8.98153889134895e-07	0.000102056	ENST00000602084+ENST00000580924	pseduogene	41.8078
ENSG00000160345	C9orf116	13.2890094300013	0.754502	0.186275335648375	4.05046535167975	5.11158782372488e-05	0.00231449	ENST00000371791+ENST00000371789+ENST00000429260+ENST00000371786+ENST00000419770	protein_coding	8.83453
ENSG00000236814	RP11-446E9.1	6.16134923623105	0.75189	0.253104761815608	2.97066563817871	0.00297155112479585	0.0406255	ENST00000435260	pseduogene	4.27944
ENSG00000259706	HSP90B2P	6.86423802296892	0.749901	0.16373496154302	4.57996931228257	4.65044158794773e-06	0.0003645	ENST00000559111	pseduogene	1.34148
ENSG00000151929	BAG3	81.3841082770581	0.74967	0.198451857006791	3.77759256695	0.000158351656449242	0.00520593	ENST00000369085+ENST00000450186	protein_coding	12.9252
ENSG00000142669	SH3BGRL3	299.99412655569	0.747284	0.132810632006337	5.62669179401556	1.83698518345511e-08	4.5058e-06	ENST00000270792+ENST00000319041	protein_coding	241.347
ENSG00000106686	SPATA6L	6.44094896682217	0.745228	0.254964740993888	2.92286724603929	0.00346824352742464	0.0450245	ENST00000485616+ENST00000486047+ENST00000461761+ENST00000454239+ENST00000381890+ENST00000475086+ENST00000381895+ENST00000406861+ENST00000223517+ENST00000496798+ENST00000498087+ENST00000451763+ENST00000485981+ENST00000471669+ENST00000497383	protein_coding	1.18402
ENSG00000226970	RP11-82H13.2	4.16709279273748	0.744232	0.194915919562926	3.81821952457178	0.000134418290467877	0.00458672	ENST00000441775	pseduogene	12.5909
ENSG00000227082	AL592494.5	10.3464394414231	0.743749	0.229282542512437	3.24381175387827	0.00117941664985518	0.0214757	ENST00000417218	lincRNA	1.38607
ENSG00000232362	ATP5LP2	3.93833173054485	0.742153	0.172908163943153	4.29217877555917	1.76928402860457e-05	0.00103465	ENST00000440646	pseduogene	6.4808
ENSG00000233954	RP11-169K16.7	17.027471266212	0.739956	0.15084385650312	4.90544148488835	9.32174284774435e-07	0.00010393	ENST00000538385+ENST00000483273	pseduogene	66.2355
ENSG00000114942	EEF1B2	16.6026950606932	0.736459	0.14467744689144	5.09034929906797	3.57404524187165e-07	4.7712e-05	ENST00000236957+ENST00000392221+ENST00000392222+ENST00000445505+ENST00000479587+ENST00000429769+ENST00000460760+ENST00000415904+ENST00000455150+ENST00000435123+ENST00000482103	protein_coding	17.9795
ENSG00000134594	RAB33A	11.6761317141983	0.735192	0.23287317407788	3.15704725442234	0.00159375516600448	0.0263925	ENST00000257017	protein_coding	4.0365
ENSG00000104691	UBXN8	31.7566426578225	0.731135	0.163927542805028	4.46010934242225	8.19178490325745e-06	0.00056741	ENST00000522735+ENST00000519246+ENST00000522968+ENST00000517341+ENST00000341403+ENST00000265616+ENST00000523607+ENST00000518059+ENST00000518239+ENST00000380154+ENST00000521598+ENST00000520436	uncertain	11.7248
ENSG00000257231	RP11-438N16.2	1.2926539337523	0.731005	0.224727022181817	3.25285736458123	0.00114250831431308	0.021024	ENST00000549314	pseduogene	2.24686
ENSG00000209082	MT-TL1	1691.2385990851	0.72774	0.182574607786843	3.98598525346753	6.72006856296283e-05	0.00275582	ENST00000386347	Mt_tRNA	13319.7
ENSG00000004779	NDUFAB1	190.405846693058	0.727701	0.124198029778281	5.85920267464953	4.6509479083331e-09	1.61613e-06	ENST00000007516+ENST00000562133+ENST00000484769+ENST00000570319+ENST00000567761	protein_coding	169.36
ENSG00000232060	RP11-255N24.4	2.68468874821281	0.726629	0.245973113850509	2.95409920171326	0.00313583186400938	0.0423439	ENST00000419995	pseduogene	3.7753
ENSG00000258956	COX4I1P1	1.28097965468471	0.726554	0.219334514107788	3.31253666616773	0.000924540061895905	0.0181163	ENST00000554239	pseduogene	1.18222
ENSG00000131174	COX7B	333.248296522213	0.723354	0.1246452376527	5.80330187074495	6.50215750050713e-09	1.98528e-06	ENST00000481445+ENST00000373335+ENST00000475465	protein_coding	102.136
ENSG00000249256	ATP5LP3	10.8286946402319	0.720743	0.161499404588017	4.4628198039033	8.08880737089846e-06	0.000563851	ENST00000514223	pseduogene	19.2352
ENSG00000184599	FAM19A3	28.6368021360991	0.719688	0.217864641874304	3.30337247217653	0.000955294088587287	0.0186016	ENST00000369630+ENST00000361886	protein_coding	12.1201
ENSG00000163155	LYSMD1	43.509616995606	0.718927	0.188285735417716	3.81827454599424	0.000134388320934078	0.00458672	ENST00000368908+ENST00000440902	protein_coding	7.77774
ENSG00000237748	UQCRBP1	4.18500828464196	0.718691	0.198870827606426	3.61385857185614	0.000301673659328526	0.00839732	ENST00000421129	pseduogene	6.5227
ENSG00000145912	NHP2	8.89055782975776	0.718147	0.230782720333092	3.11178849847051	0.00185957674642978	0.0294831	ENST00000274606+ENST00000502263+ENST00000514354+ENST00000511078+ENST00000314397+ENST00000510363	protein_coding	12.6169
ENSG00000136247	ZDHHC4	12.8234687873173	0.717885	0.2212941040348	3.24402941660102	0.00117851574443068	0.0214757	ENST00000396707+ENST00000396713+ENST00000405731+ENST00000335965+ENST00000493944+ENST00000489138+ENST00000396709+ENST00000474097+ENST00000483589+ENST00000496017+ENST00000396706+ENST00000474738	protein_coding	5.84198
ENSG00000162188	GNG3	330.42706256438	0.717342	0.0864545374746602	8.29732705511822	1.06479944748954e-16	5.55e-13	ENST00000294117	protein_coding	355.11
ENSG00000133316	WDR74	8.373008195069	0.716628	0.1965490607507	3.64605122002237	0.000266300918651816	0.00767926	ENST00000536401+ENST00000311713+ENST00000278856+ENST00000525239+ENST00000529106+ENST00000525752+ENST00000544831+ENST00000543688+ENST00000542347+ENST00000541930+ENST00000540620+ENST00000538150+ENST00000545112+ENST00000453708+ENST00000544953+ENST00000538277+ENST00000538098	protein_coding	5.02764
ENSG00000138670	RASGEF1B	152.041203074693	0.716251	0.123265456969859	5.81063965947606	6.22345896151834e-09	1.96595e-06	ENST00000509081+ENST00000264400+ENST00000335927+ENST00000504863+ENST00000436139+ENST00000514889+ENST00000507538+ENST00000512716	protein_coding	24.5624
ENSG00000119938	PPP1R3C	28.7900352258615	0.715835	0.226248348953128	3.16393589670812	0.00155651074324058	0.0261577	ENST00000238994	protein_coding	8.17742
ENSG00000224550	RP11-270C12.3	63.4309362976233	0.714213	0.170997592508964	4.17674477758351	2.9571050076431e-05	0.00153365	ENST00000416095	pseduogene	145.494
ENSG00000124399	RP11-663P9.2	16.7657055868976	0.712824	0.117763850546466	6.0529932850864	1.42178796465524e-09	6.1756e-07	ENST00000244249+ENST00000513465	pseduogene	27.9301
ENSG00000147383	NSDHL	22.238972253256	0.710187	0.190754173897977	3.72305067913366	0.000196829993536279	0.00611581	ENST00000440023+ENST00000370274+ENST00000432467	protein_coding	6.12574
ENSG00000065518	NDUFB4	150.326114775264	0.709111	0.11885026609675	5.96642060368715	2.42514659871825e-09	1.01124e-06	ENST00000184266+ENST00000485064+ENST00000492739+ENST00000461682+ENST00000491335+ENST00000496588	protein_coding	200.805
ENSG00000212829	RPS26P3	0.909638307349821	0.708562	0.209998581590302	3.37412980084894	0.000740494420130273	0.0155945	ENST00000540822+ENST00000470205	pseduogene	3.31534
ENSG00000226652	PSMD10P2	2.41804564065315	0.708466	0.240936126769392	2.94047071022441	0.00327713983058087	0.0435192	ENST00000432890	pseduogene	1.70266
ENSG00000228847	ATP5G2P4	12.8145214987901	0.706869	0.153731632588384	4.5980744430375	4.26413642885065e-06	0.000340624	ENST00000442175	pseduogene	14.6653
ENSG00000185608	MRPL40	28.4847062068853	0.706461	0.197347295970682	3.57978557624741	0.000343876262459079	0.00912147	ENST00000333130+ENST00000443660+ENST00000471259	protein_coding	15.9475
ENSG00000180764	PIPSL	9.5367681859928	0.705288	0.174137166308598	4.05018820409819	5.11764567721947e-05	0.00231449	ENST00000480546+ENST00000489875+ENST00000540371	uncertain	1.77912
ENSG00000005022	SLC25A5	121.949143438653	0.704823	0.131267891368036	5.36934655263085	7.90224403926486e-08	1.40815e-05	ENST00000317881+ENST00000460013+ENST00000475354+ENST00000463551	protein_coding	62.8627
ENSG00000223380	SEC22B	69.9613319755068	0.704475	0.151374157748321	4.65386543421793	3.25769450290475e-06	0.000270082	ENST00000453618+ENST00000500203	processed_transcript	16.2249
ENSG00000152147	GEMIN6	19.7083396650154	0.703581	0.214071487871528	3.28666591415895	0.00101381031863924	0.0193031	ENST00000409011+ENST00000281950+ENST00000409566	protein_coding	3.2145
ENSG00000215414	PSMA6P1	6.66218361189687	0.699655	0.187902370567233	3.7235036112493	0.00019647704934521	0.00611581	ENST00000536206+ENST00000400275	pseduogene	6.21791
ENSG00000154447	SH3RF1	17.0887767232592	0.699062	0.227498330922769	3.07282243600779	0.00212044618373722	0.03192	ENST00000284637+ENST00000508685+ENST00000511421+ENST00000502315+ENST00000510806	protein_coding	1.57242
ENSG00000197358	BNIP3P1	8.62537668932302	0.698294	0.170510918896297	4.0953010295138	4.21620194212333e-05	0.00199781	ENST00000355069+ENST00000550043+ENST00000547295	uncertain	7.11486
ENSG00000227173	MYL6P3	2.8819986048297	0.694717	0.189289764646191	3.67012339776672	0.00024243340694509	0.00720013	ENST00000436904	pseduogene	3.15327
ENSG00000227682	ATP5A1P2	21.1417745945029	0.692552	0.170424683685293	4.06368210530917	4.83046033799776e-05	0.00220856	ENST00000412323	pseduogene	47.0603
ENSG00000082153	BZW1	45.0237711651241	0.692484	0.111666638743452	6.20135419374554	5.5979368501343e-10	2.82917e-07	ENST00000450637+ENST00000409600+ENST00000410110+ENST00000452206+ENST00000464483+ENST00000460660+ENST00000409226+ENST00000452790+ENST00000447069+ENST00000419090+ENST00000463310+ENST00000491576+ENST00000359893	protein_coding	22.4079
ENSG00000248923	MTND5P11	12.9282207736253	0.689889	0.228776076938917	3.01556236529547	0.00256503183127507	0.036504	ENST00000511037	pseduogene	2.86399
ENSG00000105988	NHP2P1	4.08460362695156	0.685582	0.228409842058905	3.00154110834097	0.00268616768005218	0.0377894	ENST00000335274	pseduogene	5.59249
ENSG00000128944	KNSTRN	14.4539979829387	0.685258	0.224200358893169	3.05645316803309	0.00223972465590929	0.0330708	ENST00000249776+ENST00000560981+ENST00000416151+ENST00000559604+ENST00000448395+ENST00000560321+ENST00000608100+ENST00000559591+ENST00000560220+ENST00000561196+ENST00000561169+ENST00000559304+ENST00000557920+ENST00000560673+ENST00000559083+ENST00000561367	protein_coding	4.343
ENSG00000143436	MRPL9	12.138546118673	0.684064	0.22769352019715	3.00432106654648	0.00266174273755443	0.0375471	ENST00000368830+ENST00000467306+ENST00000468006+ENST00000368829+ENST00000495867+ENST00000478926+ENST00000486707+ENST00000492684+ENST00000481777+ENST00000461182+ENST00000462783	protein_coding	16.1914
ENSG00000147123	NDUFB11	107.361196628567	0.68349	0.128108473442355	5.33524156841642	9.54174394539666e-08	1.63062e-05	ENST00000377811+ENST00000276062	protein_coding	61.8823
ENSG00000168653	NDUFS5	307.96409112246	0.681221	0.124358914446754	5.47786175794194	4.30496246333443e-08	8.714e-06	ENST00000372967+ENST00000372969	protein_coding	311.608
ENSG00000112319	EYA4	45.0148021976881	0.674899	0.224402307753338	3.00754098917688	0.00263370604622406	0.0372525	ENST00000452339+ENST00000367895+ENST00000430974+ENST00000355167+ENST00000441015+ENST00000355286+ENST00000531901+ENST00000525849+ENST00000431403+ENST00000531861+ENST00000421413+ENST00000525614+ENST00000497350+ENST00000532518	protein_coding	3.6755
ENSG00000229161	TCP1P1	3.48208769103782	0.674834	0.22103913426044	3.05300591280597	0.00226561474143279	0.0332881	ENST00000412860	pseduogene	1.15306
ENSG00000228089	RP1-197O17.2	3.64859601302203	0.674626	0.209298037752254	3.22327813151718	0.00126732433623854	0.022449	ENST00000435914	pseduogene	4.35773
ENSG00000109971	HSPA8	395.562546092469	0.673913	0.142468733899899	4.73025476374838	2.24238256612633e-06	0.000207784	ENST00000453788+ENST00000534624+ENST00000533540+ENST00000532636+ENST00000532091+ENST00000227378+ENST00000534319+ENST00000526110+ENST00000524552+ENST00000526686+ENST00000533238+ENST00000526862+ENST00000527983+ENST00000528292+ENST00000532780+ENST00000525463+ENST00000532167+ENST00000525624+ENST00000534567+ENST00000527387+ENST00000532182+ENST00000524590+ENST00000530391+ENST00000531063	protein_coding	130.093
ENSG00000270264	NDUFB8P2	9.00958373074332	0.671594	0.115665164759789	5.80636128674735	6.38451193104638e-09	1.98528e-06	ENST00000605113	pseduogene	8.13795
ENSG00000188002	RP11-43F13.1	7.83092554985151	0.671577	0.222815098759658	3.01405475529605	0.0025778127710345	0.0366359	ENST00000507841+ENST00000512335+ENST00000507290+ENST00000507505+ENST00000522848+ENST00000502273+ENST00000343123	uncertain	2.17738
ENSG00000142507	PSMB6	167.730933437017	0.670183	0.126680903075679	5.2903260874754	1.22098473836803e-07	2.00443e-05	ENST00000270586+ENST00000575079+ENST00000571309+ENST00000575643	protein_coding	122.171
ENSG00000120306	CYSTM1	214.436080901034	0.668378	0.102905155602568	6.49509241731665	8.29824542861288e-11	6.17893e-08	ENST00000261811+ENST00000509589+ENST00000509789+ENST00000504227	protein_coding	74.252
ENSG00000196792	STRN3	69.4588974278992	0.668322	0.158687779412726	4.21155336010012	2.53620626708614e-05	0.00136988	ENST00000355683+ENST00000357479+ENST00000555358+ENST00000554124+ENST00000366206+ENST00000556577+ENST00000554991+ENST00000555152	protein_coding	8.40878
ENSG00000269904	MAP2K4P1	18.4684642076426	0.666939	0.187462377475785	3.5577244918279	0.000374081363694771	0.00958135	ENST00000602584+ENST00000438453	uncertain	8.12042
ENSG00000090013	BLVRB	50.8714681671746	0.6661	0.159180513822976	4.18455951542457	2.85719585756189e-05	0.00148924	ENST00000263368+ENST00000595483+ENST00000601346+ENST00000597870	protein_coding	39.8434
ENSG00000234176	HSPA8P1	5.27230296657925	0.66271	0.203362532513044	3.25876046070918	0.00111900106139832	0.020701	ENST00000425843	pseduogene	1.51974
ENSG00000151131	C12orf45	21.8003566959294	0.657444	0.211358316652811	3.11056562312221	0.00186729399612871	0.0295503	ENST00000552951+ENST00000280749+ENST00000548583	protein_coding	19.7084
ENSG00000171155	C1GALT1C1	26.1128170479288	0.656819	0.166695465756047	3.94023047787486	8.14033625638405e-05	0.0031723	ENST00000304661+ENST00000371313	protein_coding	7.82326
ENSG00000226976	COX6A1P2	64.2462640552586	0.65609	0.12183110479886	5.38524179462559	7.2347324508984e-08	1.32313e-05	ENST00000423336	protein_coding	111.93
ENSG00000126432	PRDX5	274.047137855731	0.655528	0.114960434151424	5.70220160152808	1.18269831413311e-08	3.0797e-06	ENST00000265462+ENST00000347941+ENST00000352435	protein_coding	178.165
ENSG00000258645	HSPE1P2	8.24367304168233	0.655391	0.180158283435827	3.6378603428059	0.000274912416352162	0.00783691	ENST00000554777	pseduogene	15.4002
ENSG00000186479	RGS7BP	21.1216850435469	0.654831	0.226828041307637	2.886904955094	0.00389051735504814	0.0490111	ENST00000508162+ENST00000334025+ENST00000505263	protein_coding	2.9648
ENSG00000225176	ATP5LP4	1.65040196189781	0.654123	0.199853808075577	3.2730054765646	0.0010641041576518	0.019951	ENST00000434169	pseduogene	2.95569
ENSG00000197885	NKIRAS1	96.5173779987174	0.650043	0.117468935524449	5.53374724662321	3.13460591598876e-08	6.73746e-06	ENST00000388759+ENST00000443659+ENST00000421515+ENST00000425478+ENST00000437230+ENST00000412028+ENST00000415901+ENST00000416026	protein_coding	25.112
ENSG00000104408	EIF3E	19.7459177789919	0.649908	0.140568271068194	4.62343394368988	3.77438973135318e-06	0.000308597	ENST00000523674+ENST00000220849+ENST00000522352+ENST00000519030+ENST00000521614+ENST00000519517+ENST00000519627+ENST00000519413+ENST00000522445+ENST00000523646+ENST00000521440+ENST00000518442+ENST00000518100+ENST00000522887+ENST00000521297+ENST00000518345+ENST00000518634+ENST00000522088	protein_coding	13.3223
ENSG00000238098	ABCA17P	8.22092864263459	0.649349	0.223679017272658	2.90304033892251	0.00369559032347367	0.047275	ENST00000512848+ENST00000469908+ENST00000482286+ENST00000466730+ENST00000494925+ENST00000505660	uncertain	4.42259
ENSG00000137168	PPIL1	28.4494579545851	0.647133	0.157783941745357	4.10138792153238	4.10679411999247e-05	0.00196382	ENST00000373699+ENST00000483552	protein_coding	10.4439
ENSG00000234782	TPT1P9	2.64017303829572	0.646916	0.187712323772582	3.44631364593021	0.000568290365599772	0.012809	ENST00000398368+ENST00000413759	pseduogene	3.09545
ENSG00000174100	MRPL45	20.0067258408513	0.646694	0.184025014389454	3.5141636549423	0.000441140938896604	0.0107783	ENST00000312513+ENST00000582535+ENST00000580762+ENST00000581817+ENST00000579911	protein_coding	7.13444
ENSG00000154518	ATP5G3	486.73972163199	0.645557	0.0960037982362184	6.72429039586877	1.76450216920328e-11	1.83941e-08	ENST00000284727+ENST00000409194+ENST00000392541+ENST00000497075+ENST00000472782	protein_coding	226.043
ENSG00000143155	TIPRL	34.1226707846142	0.644889	0.152668753857317	4.22410682699323	2.39890248185024e-05	0.00130929	ENST00000367833+ENST00000367830	protein_coding	10.4245
ENSG00000170315	UBB	462.564332739696	0.644339	0.089563235615949	7.19423229337422	6.28131778662911e-13	8.18495e-10	ENST00000577958+ENST00000302182+ENST00000577640+ENST00000535788+ENST00000395839+ENST00000395837+ENST00000578706+ENST00000578649	protein_coding	1053.85
ENSG00000232734	ATP5G1P7	1.38759486206603	0.644325	0.20435325060027	3.15299455973512	0.0016160481855982	0.0266558	ENST00000444398	pseduogene	1.68643
ENSG00000227241	AC011998.4	3.2037294113429	0.64427	0.178333199561417	3.61273272334302	0.000302986966914445	0.00842263	ENST00000433403	pseduogene	15.8039
ENSG00000170946	DNAJC24	12.7196025735053	0.643424	0.214871895995705	2.99445465511539	0.00274935919001297	0.0383934	ENST00000465995+ENST00000529086+ENST00000527601+ENST00000532385+ENST00000525511+ENST00000536040+ENST00000526042+ENST00000526529+ENST00000527731+ENST00000530125+ENST00000524747+ENST00000395949	protein_coding	3.45385
ENSG00000169021	UQCRFS1	102.560722519018	0.642719	0.0963368987027022	6.671573993017	2.53074302142768e-11	2.51255e-08	ENST00000304863	protein_coding	66.084
ENSG00000134294	SLC38A2	279.021278736751	0.642241	0.111219036314709	5.77455727768795	7.71556809496937e-09	2.26566e-06	ENST00000256689+ENST00000549258+ENST00000551374+ENST00000552703+ENST00000546520+ENST00000548785+ENST00000548111+ENST00000548236+ENST00000552414+ENST00000548870+ENST00000547252+ENST00000551405+ENST00000553252	protein_coding	53.4605
ENSG00000013588	GPRC5A	59.8184735468086	0.640114	0.183574898901527	3.48693590662795	0.00048858843448159	0.011602	ENST00000014914+ENST00000537783+ENST00000542056+ENST00000534831+ENST00000540125	protein_coding	4.37856
ENSG00000103642	LACTB	11.8887019724717	0.639145	0.190521039534074	3.3547233620682	0.000794443878172638	0.0162927	ENST00000261893+ENST00000413507+ENST00000557972+ENST00000559782	protein_coding	2.42896
ENSG00000124688	MAD2L1BP	18.026244891422	0.638683	0.177601687904798	3.59615514547866	0.00032295523165437	0.00875217	ENST00000451025+ENST00000372171+ENST00000508232	protein_coding	6.78481
ENSG00000170445	HARS	68.6335684331607	0.638318	0.156310963092129	4.08364378265806	4.43349759777619e-05	0.00208151	ENST00000504156+ENST00000431330+ENST00000457527+ENST00000448240+ENST00000307633+ENST00000504366+ENST00000438307+ENST00000509087+ENST00000415192+ENST00000506579+ENST00000507746+ENST00000512396+ENST00000518126+ENST00000502888	protein_coding	29.2888
ENSG00000227973	PIN4P1	2.67763649892853	0.638238	0.200705293195677	3.17997607288193	0.00147287213252787	0.0252836	ENST00000451079	pseduogene	4.37593
ENSG00000080561	MID2	14.6753042573228	0.637639	0.217404611180106	2.93295952319358	0.00335747660861317	0.0442417	ENST00000451923+ENST00000262843+ENST00000443968+ENST00000474517	protein_coding	3.31506
ENSG00000173598	NUDT4	15.5502241702422	0.637023	0.180157351877422	3.53592696648074	0.000406347014813354	0.0101694	ENST00000337179+ENST00000415493+ENST00000549992+ENST00000550056+ENST00000547014+ENST00000548662+ENST00000546925	protein_coding	4.65586
ENSG00000232829	GSTO3P	4.45690365312642	0.635647	0.179739507103885	3.53649285462103	0.000405477469679061	0.0101608	ENST00000504733	pseduogene	3.2076
ENSG00000213867	RP11-829H16.2	6.12849721275446	0.634124	0.169889372289954	3.73257283693757	0.000189533864925727	0.00599635	ENST00000468034	pseduogene	6.8503
ENSG00000263017	RP11-356I18.1	4.17329123662374	0.630608	0.17083838066571	3.69125549772005	0.000223149841852525	0.00669417	ENST00000570544	pseduogene	6.35375
ENSG00000148926	ADM	47.1934560304176	0.630275	0.172925367640684	3.64478140070172	0.000267619174238257	0.00769599	ENST00000278175+ENST00000534464+ENST00000530439+ENST00000524948+ENST00000528655+ENST00000525063+ENST00000526492+ENST00000528544	protein_coding	13.8125
ENSG00000228834	RP11-249L21.4	12.4668129547583	0.630138	0.14121782556147	4.46217093087152	8.11334649797091e-06	0.000563851	ENST00000447543	pseduogene	30.8861
ENSG00000223886	RP11-251G23.2	3.58104611702093	0.629439	0.194174503196001	3.24161727632745	0.00118853520279604	0.0216228	ENST00000493920	pseduogene	4.35744
ENSG00000236876	TMSB4XP1	1.05554531720929	0.62931	0.21084604980376	2.98469141495111	0.00283864533415234	0.0392029	ENST00000536927+ENST00000424567	pseduogene	3.20675
ENSG00000233328	PFN1P1	11.3355555205323	0.628084	0.157133128887848	3.99714261720792	6.41116783847879e-05	0.00267869	ENST00000442087	pseduogene	19.4649
ENSG00000095059	DHPS	33.6014064890708	0.627145	0.176245649628341	3.5583558836136	0.000373183457414699	0.00958071	ENST00000598246+ENST00000210060+ENST00000600639+ENST00000351660+ENST00000600864+ENST00000601639+ENST00000594424+ENST00000600510+ENST00000601537+ENST00000595844+ENST00000593400+ENST00000596847+ENST00000595912+ENST00000600451+ENST00000597152+ENST00000598850+ENST00000596162+ENST00000593432+ENST00000599481+ENST00000593423+ENST00000595100+ENST00000593473	protein_coding	59.8451
ENSG00000272520	CTD-2044J15.2	23.87328035998	0.626119	0.179723582876859	3.48378636180007	0.000494373937790475	0.0116994	ENST00000606434	lincRNA	3.76054
ENSG00000168234	TTC39C	28.7588227652353	0.625527	0.213071815817195	2.93575555234762	0.00332736413243028	0.0440459	ENST00000304621+ENST00000317571+ENST00000578150+ENST00000540918+ENST00000579214+ENST00000581394+ENST00000584424+ENST00000584095+ENST00000584250+ENST00000577185	protein_coding	5.00395
ENSG00000110218	PANX1	18.4347035273229	0.623381	0.198385801385783	3.1422651822585	0.00167646124444706	0.0272769	ENST00000227638+ENST00000436171	protein_coding	3.08683
ENSG00000230037	UBBP1	1.13055117873425	0.621969	0.213339343924119	2.91539857845006	0.00355234545970455	0.0458398	ENST00000392399	pseduogene	1.04107
ENSG00000196305	IARS	134.855503060934	0.620694	0.124540655640124	4.98386433457381	6.23267873832925e-07	7.38325e-05	ENST00000375643+ENST00000375629+ENST00000443024+ENST00000447699+ENST00000375627+ENST00000474340+ENST00000473915+ENST00000467876+ENST00000472894+ENST00000395554+ENST00000498025+ENST00000490438+ENST00000430417	protein_coding	16.5397
ENSG00000168906	MAT2A	31.5220581386453	0.620444	0.196138218817197	3.16330086879365	0.00155991027301559	0.0261686	ENST00000306434+ENST00000469221+ENST00000465151+ENST00000481412+ENST00000409017+ENST00000490878	protein_coding	7.08578
ENSG00000213619	NDUFS3	113.797713609299	0.619496	0.121606499531627	5.09426979488645	3.50087929294331e-07	4.7396e-05	ENST00000533507+ENST00000263774+ENST00000528192+ENST00000534208+ENST00000530295+ENST00000534716+ENST00000533105+ENST00000524568+ENST00000531351+ENST00000525378+ENST00000525212+ENST00000527178+ENST00000529276	protein_coding	76.1261
ENSG00000182747	SLC35D3	38.7299540575568	0.618805	0.194049113926432	3.18891166457087	0.00142809510062466	0.0247403	ENST00000331858	protein_coding	8.05551
ENSG00000233426	EIF3FP3	11.9812721368498	0.617893	0.196095136308421	3.15098398075892	0.00162721414688572	0.0266922	ENST00000434851+ENST00000537260	pseduogene	16.0278
ENSG00000180964	TCEAL8	51.9489289764365	0.616898	0.17598482690087	3.50540234925207	0.000455917714186644	0.0110786	ENST00000372685+ENST00000360000+ENST00000451678	protein_coding	20.4065
ENSG00000218510	LINC00339	10.0642024936068	0.612356	0.208795271076197	2.93280609886057	0.0033591361069735	0.0442417	ENST00000434233+ENST00000420503+ENST00000404210+ENST00000416769+ENST00000452322	lincRNA	4.30379
ENSG00000171202	TMEM126A	34.2770367944351	0.608206	0.17391062230717	3.49723589288318	0.00047010594063208	0.0113016	ENST00000525353+ENST00000528105+ENST00000531366+ENST00000304511+ENST00000532180+ENST00000528531	protein_coding	30.1853
ENSG00000159685	CHCHD6	52.4560914946442	0.607231	0.146048297639701	4.15773929923119	3.21412518082813e-05	0.00162753	ENST00000290913+ENST00000503119+ENST00000508789+ENST00000514908+ENST00000513253+ENST00000515867+ENST00000504973+ENST00000510044	protein_coding	45.8204
ENSG00000264350	SNRPGP2	6.58884335742772	0.606262	0.178390541448098	3.39851244134944	0.000677533812967174	0.0146686	ENST00000580909	pseduogene	13.5749
ENSG00000106605	BLVRA	44.9867897742929	0.601447	0.16917467631513	3.55518327459417	0.000377715705928478	0.00965073	ENST00000265523+ENST00000402924+ENST00000424330+ENST00000453612+ENST00000486984	protein_coding	21.8628
ENSG00000234536	AC096582.7	27.8847070552246	0.60081	0.196785521339346	3.05311976215078	0.00226475533356721	0.0332881	ENST00000438487	pseduogene	52.046
ENSG00000169740	ZNF32	21.9682580381489	0.600498	0.20498951841198	2.929408904811	0.0033960734037937	0.0445313	ENST00000374433+ENST00000395797+ENST00000485351	protein_coding	13.3572
ENSG00000147684	NDUFB9	232.608480466169	0.599493	0.115569422688519	5.18729526710507	2.13370290043707e-07	3.2004e-05	ENST00000276689+ENST00000518008+ENST00000522532+ENST00000518657+ENST00000517367+ENST00000524241+ENST00000517830	protein_coding	251.673
ENSG00000138698	RAP1GDS1	422.073757182694	0.597419	0.100661196207487	5.93494563606431	2.9394288123889e-09	1.17854e-06	ENST00000509011+ENST00000503667+ENST00000380158+ENST00000508490+ENST00000264572+ENST00000505378+ENST00000508213+ENST00000408927+ENST00000512857+ENST00000511379+ENST00000514122+ENST00000453712+ENST00000515187+ENST00000511212+ENST00000510870+ENST00000507303+ENST00000339360+ENST00000408900+ENST00000503745+ENST00000509501+ENST00000514139	protein_coding	61.6161
ENSG00000126756	UXT	29.3529498469937	0.596871	0.177989581842479	3.35340563533214	0.00079823627572819	0.0163321	ENST00000333119+ENST00000485641+ENST00000460840+ENST00000335890+ENST00000376964	protein_coding	35.8078
ENSG00000109107	ALDOC	162.884930331727	0.595224	0.147803415989538	4.02713267364138	5.6461176594264e-05	0.00249398	ENST00000226253+ENST00000395321+ENST00000395319+ENST00000460201+ENST00000584086+ENST00000581807+ENST00000435638+ENST00000578590+ENST00000582381	protein_coding	60.4914
ENSG00000101247	NDUFAF5	24.648170348873	0.594403	0.174529218181868	3.40575103371894	0.00065982320825897	0.0143415	ENST00000378106+ENST00000378081+ENST00000463598+ENST00000485738+ENST00000477732+ENST00000475968+ENST00000481249+ENST00000476536+ENST00000469177+ENST00000464269+ENST00000479716+ENST00000487478+ENST00000476124+ENST00000476200+ENST00000479682+ENST00000486772	protein_coding	16.306
ENSG00000238082	AC009948.7	3.72507436260059	0.593627	0.182884110853637	3.24591959137504	0.00117071901082833	0.021398	ENST00000437039	pseduogene	2.86952
ENSG00000225616	RP4-604A21.1	2.22725270028602	0.593172	0.175799509422778	3.3741376463925	0.000740473314910223	0.0155945	ENST00000425821	pseduogene	3.58998
ENSG00000111666	CHPT1	32.0526846833752	0.592192	0.203822943015888	2.90542567236583	0.00366753944536943	0.047023	ENST00000550385+ENST00000229266+ENST00000549872+ENST00000552351+ENST00000549128+ENST00000546490+ENST00000552215+ENST00000552329+ENST00000546873+ENST00000552213	protein_coding	6.5944
ENSG00000165629	ATP5C1	151.83646530183	0.592178	0.128583991567703	4.60538082063333	4.11711724315193e-06	0.000330145	ENST00000356708+ENST00000493053+ENST00000462760+ENST00000460362+ENST00000541227+ENST00000335698+ENST00000465936+ENST00000460820+ENST00000472202+ENST00000473809+ENST00000480528	protein_coding	154.983
ENSG00000180879	SSR4	134.575538461135	0.589832	0.130949522364371	4.50426725564494	6.66023464474839e-06	0.000490669	ENST00000320857+ENST00000491833+ENST00000370087+ENST00000482902+ENST00000370086+ENST00000460616+ENST00000370085+ENST00000471724+ENST00000471880+ENST00000486204+ENST00000485612+ENST00000447375	protein_coding	142.408
ENSG00000144867	SRPRB	119.295829237898	0.589724	0.11410404295559	5.16830362440519	2.36228321015341e-07	3.44414e-05	ENST00000466490+ENST00000484684+ENST00000494297+ENST00000481356+ENST00000466636	protein_coding	20.8702
ENSG00000175203	DCTN2	294.073610994128	0.589337	0.0892518195954144	6.60307830016563	4.02706700859793e-11	3.81638e-08	ENST00000548249+ENST00000537439+ENST00000543672+ENST00000434715+ENST00000550201+ENST00000549394+ENST00000546758+ENST00000550988+ENST00000552390+ENST00000550086+ENST00000550954+ENST00000551872+ENST00000548736+ENST00000546670+ENST00000551611+ENST00000546965+ENST00000550750+ENST00000548949+ENST00000551142+ENST00000547345+ENST00000551400+ENST00000550576+ENST00000547480+ENST00000546559+ENST00000549712	protein_coding	72.423
ENSG00000135940	COX5B	528.644186642402	0.587653	0.100549451298337	5.84441698846202	5.0834545535535e-09	1.70943e-06	ENST00000258424+ENST00000464949+ENST00000491989+ENST00000494306	protein_coding	433.53
ENSG00000234925	RP11-254B13.3	11.9671573778126	0.587549	0.161437900529353	3.63947173378353	0.000273197922771593	0.00781331	ENST00000414313	pseduogene	12.6414
ENSG00000122545	2007-09-01	167.526452269774	0.587413	0.105137809000534	5.5870791209435	2.30920533815282e-08	5.3494e-06	ENST00000435235+ENST00000469679+ENST00000350320+ENST00000399034+ENST00000399035+ENST00000475109+ENST00000493626+ENST00000494488+ENST00000425198+ENST00000473201+ENST00000432293+ENST00000492940+ENST00000485569	protein_coding	74.8222
ENSG00000198522	GPN1	26.2041769872104	0.585682	0.171694307169837	3.41118914533937	0.000646802061548699	0.0141058	ENST00000515877+ENST00000481754+ENST00000424214+ENST00000458167+ENST00000503738+ENST00000407583+ENST00000264718+ENST00000436280+ENST00000610189+ENST00000461249+ENST00000478484	protein_coding	9.62051

## Sheet: padj<0.05 RPKMcontrol>1 FC<-1.5
ensemblID.	refseq.Name	baseMean	log2FoldChange	lfcSE	stat	pvalue	padj	txID.	biotype.consensus.	Control_RPKM_AVERAGE
ENSG00000229828	RP11-94I2.1	3.33612639777513	-1.90285	0.255557067820297	-7.44587608943054	9.6303164856311e-14	2.00782e-10	ENST00000420737	pseduogene	12.4537
ENSG00000237973	hsa-mir-6723	1141.78055462199	-1.58032	0.253758743146508	-6.22763878204845	4.73517238337767e-10	2.59799e-07	ENST00000414273	pseduogene	942.843
ENSG00000261069	SNORD116-20	9.87336091890477	-1.50294	0.276083563619981	-5.44379152830259	5.21582592969013e-08	1.0069e-05	ENST00000567527+ENST00000384529+ENST00000384507	lincRNA	15.2207
ENSG00000198134	RP11-267J23.4	1.26575650949002	-1.37846	0.234288156585878	-5.88362325762934	4.01380924098407e-09	1.43866e-06	ENST00000358818+ENST00000539347	pseduogene	6.26572
ENSG00000179242	CDH4	17.2345049834836	-1.34295	0.215375038189405	-6.23542360481567	4.5055719302197e-10	2.53883e-07	ENST00000360469+ENST00000543233	protein_coding	2.30365
ENSG00000143373	ZNF687	8.71841865727699	-1.28458	0.253730259833124	-5.06276664856655	4.13215516688744e-07	5.31798e-05	ENST00000443959+ENST00000336715+ENST00000449313+ENST00000324048+ENST00000368879+ENST00000426871+ENST00000459919+ENST00000436614	protein_coding	2.445
ENSG00000197355	UAP1L1	4.40239069906836	-1.26505	0.271300885903431	-4.66290058103521	3.11783397931473e-06	0.000262112	ENST00000409858+ENST00000476184+ENST00000360271+ENST00000474787	protein_coding	1.09327
ENSG00000145198	VWA5B2	11.8557966940147	-1.26495	0.218037231698677	-5.80155438467676	6.57029793406542e-09	1.98528e-06	ENST00000426955+ENST00000497229+ENST00000273794+ENST00000461141+ENST00000474580+ENST00000493493	protein_coding	3.56181
ENSG00000197530	MIB2	14.7259206281899	-1.23257	0.198197088380563	-6.21889135869565	5.00679807303314e-10	2.67658e-07	ENST00000378710+ENST00000360522+ENST00000357210+ENST00000520777+ENST00000355826+ENST00000518681+ENST00000505820+ENST00000479659+ENST00000489635+ENST00000511502+ENST00000477990+ENST00000514363+ENST00000487053+ENST00000502470+ENST00000378712+ENST00000507082+ENST00000463492+ENST00000510793+ENST00000504599+ENST00000507229+ENST00000512004+ENST00000503789+ENST00000378708+ENST00000506488+ENST00000508455…	protein_coding	20.9181
ENSG00000162542	TMCO4	2.70989305332287	-1.22642	0.27582755116659	-4.44632368632978	8.73522978619446e-06	0.000603049	ENST00000294543+ENST00000375127+ENST00000489814+ENST00000375122+ENST00000494342+ENST00000489135+ENST00000496528+ENST00000462171+ENST00000488449	protein_coding	1.25928
ENSG00000131094	C1QL1	2.0933840767316	-1.22006	0.270329990221389	-4.51324311718831	6.38437661521202e-06	0.000477089	ENST00000253407	protein_coding	1.98261
ENSG00000006128	TAC1	111.257926996159	-1.20108	0.216436736207353	-5.54931646239909	2.86788645543847e-08	6.42931e-06	ENST00000319273+ENST00000346867+ENST00000350485+ENST00000495916+ENST00000491437	protein_coding	92.139
ENSG00000225630	MTND2P28	813.901211797413	-1.17229	0.270381391282206	-4.33567492695116	1.45313560330483e-05	0.0008937	ENST00000457540	pseduogene	1022.43
ENSG00000126391	FRMD8	5.14030849562457	-1.16707	0.267990507680012	-4.35487949576043	1.33140139235622e-05	0.000838622	ENST00000317568+ENST00000531296+ENST00000528854+ENST00000355991+ENST00000533782+ENST00000416776+ENST00000526201+ENST00000525156+ENST00000531151	protein_coding	1.43441
ENSG00000167615	LENG8	27.9913016935736	-1.15843	0.227617710386098	-5.08935278486484	3.59287656538616e-07	4.7712e-05	ENST00000326764+ENST00000439657+ENST00000376514+ENST00000376526+ENST00000436479+ENST00000443957+ENST00000431846+ENST00000462541+ENST00000421200	protein_coding	31.7931
ENSG00000158296	SLC13A3	8.57475605881793	-1.14622	0.26352946426687	-4.34948138076509	1.36459868846064e-05	0.000851812	ENST00000435032+ENST00000396360+ENST00000290317+ENST00000279027+ENST00000472148+ENST00000413164+ENST00000495082+ENST00000468915+ENST00000464518+ENST00000450298+ENST00000420568+ENST00000372121+ENST00000417157+ENST00000339636	protein_coding	1.90107
ENSG00000224201	PNMA6A	1.97700658205108	-1.12058	0.257682155129746	-4.34869419557611	1.36950518686776e-05	0.000852323	ENST00000535416+ENST00000453825	protein_coding	27.1197
ENSG00000136040	PLXNC1	19.3502112787688	-1.119	0.269145336503981	-4.1575928002864	3.2161864122522e-05	0.00162753	ENST00000258526+ENST00000546733+ENST00000551850+ENST00000546659+ENST00000549810+ENST00000549217+ENST00000550080+ENST00000547057+ENST00000551495+ENST00000545312+ENST00000549187	protein_coding	2.52192
ENSG00000170271	FAXDC2	11.7105689492774	-1.11678	0.257956801629361	-4.3293138529837	1.49574639208532e-05	0.000909178	ENST00000326080+ENST00000423554+ENST00000524250+ENST00000517938+ENST00000520581+ENST00000521518+ENST00000524363+ENST00000522825+ENST00000519501+ENST00000519258+ENST00000523997+ENST00000518651+ENST00000517448+ENST00000517874+ENST00000520968+ENST00000520461	protein_coding	2.85513
ENSG00000001617	SEMA3F	7.24471407647009	-1.09984	0.235492248790376	-4.67038220248069	3.0063984441937e-06	0.000255838	ENST00000414301+ENST00000450338+ENST00000413852+ENST00000002829+ENST00000426511+ENST00000434342+ENST00000420831+ENST00000493743+ENST00000470737	protein_coding	2.21153
ENSG00000172137	CALB2	23.9658704980481	-1.09539	0.275958955674879	-3.96940712376348	7.2051683870393e-05	0.0029169	ENST00000349553+ENST00000302628+ENST00000562305+ENST00000490520+ENST00000467817	protein_coding	16.5107
ENSG00000272702	RP11-44N22.3	4.24156156673684	-1.09253	0.255680026587993	-4.27301685821447	1.92845870566914e-05	0.00111685	ENST00000608612+ENST00000610134	uncertain	8.01752
ENSG00000167995	BEST1	8.57678360131846	-1.08499	0.271160882882666	-4.00129363832936	6.29971222594601e-05	0.00265174	ENST00000378043+ENST00000378042+ENST00000301774+ENST00000534553+ENST00000435278+ENST00000529265+ENST00000533521+ENST00000524926+ENST00000524877+ENST00000449131+ENST00000526988	protein_coding	2.27242
ENSG00000259425	RP11-566K19.5	34.9366626837953	-1.07558	0.2253894236842	-4.77211121932384	1.82304780696946e-06	0.000172767	ENST00000559762+ENST00000559740+ENST00000560434+ENST00000558417	uncertain	12.0002
ENSG00000244485	RPL18P13	1.6562829877549	-1.07456	0.211219889696719	-5.08739204556197	3.63020901701011e-07	4.79027e-05	ENST00000478088	pseduogene	2.43745
ENSG00000053438	NNAT	4.19640208265294	-1.07004	0.274194475202303	-3.90250137844876	9.52036958777711e-05	0.00352219	ENST00000062104+ENST00000346199	protein_coding	3.37132
ENSG00000116815	CD58	3.85250979086234	-1.06262	0.276149158473135	-3.84798751910722	0.000119092119018978	0.00421554	ENST00000369489+ENST00000464088+ENST00000457047+ENST00000526981+ENST00000369487	protein_coding	2.62336
ENSG00000136944	LMX1B	20.0236456347657	-1.05673	0.239779832715091	-4.40708116664922	1.04772934260503e-05	0.000709224	ENST00000425646+ENST00000355497+ENST00000373474+ENST00000526117+ENST00000561065	protein_coding	2.93338
ENSG00000162878	PKDCC	4.74802536690953	-1.05207	0.255649216937256	-4.11528479188174	3.86701654366354e-05	0.00189205	ENST00000294964+ENST00000401498+ENST00000485578+ENST00000492861+ENST00000475868+ENST00000475241+ENST00000490302+ENST00000470578+ENST00000480099	protein_coding	2.29403
ENSG00000261113	RP11-141O15.1	8.46634050654232	-1.05121	0.218299850692077	-4.81541822999193	1.46891906624141e-06	0.000146533	ENST00000568125+ENST00000562376+ENST00000563344	antisense	17.7116
ENSG00000262943	ALOX12P2	2.85121299330406	-1.0493	0.275989458533545	-3.80196800504629	0.000143551268598817	0.00481949	ENST00000574727+ENST00000573104+ENST00000576636+ENST00000574271+ENST00000570835+ENST00000571201+ENST00000570890+ENST00000570921+ENST00000572215+ENST00000572357+ENST00000575787+ENST00000574183	uncertain	2.87876
ENSG00000114841	DNAH1	10.397427673837	-1.04909	0.259242333075797	-4.04674334142555	5.19351316270275e-05	0.00233361	ENST00000420323+ENST00000486752+ENST00000497875+ENST00000466628+ENST00000488988+ENST00000490713+ENST00000480649+ENST00000487254	protein_coding	2.51554
ENSG00000241288	RP11-379B18.5	0.852143177511066	-1.03218	0.27450196254775	-3.7601943878166	0.000169781376558415	0.00547105	ENST00000599350+ENST00000601985+ENST00000594843+ENST00000468859+ENST00000599176+ENST00000600280+ENST00000597749+ENST00000600712+ENST00000609312+ENST00000609352+ENST00000608488	lincRNA	1.22043
ENSG00000259943	RP1-39G22.7	10.0379210134385	-1.03162	0.269322721989173	-3.8304158292729	0.000127926888423991	0.00442313	ENST00000567508	antisense	4.91912
ENSG00000187951	ARHGAP11B	3.83496274415949	-1.03033	0.26670188075437	-3.86323302980247	0.000111896171757259	0.00400158	ENST00000567449+ENST00000564902+ENST00000563110+ENST00000428041+ENST00000566362+ENST00000568574+ENST00000566548+ENST00000602616+ENST00000562954	protein_coding	2.10858
ENSG00000224940	PRRT4	5.8103409644768	-1.02739	0.25856665548559	-3.97342313895121	7.08470267912468e-05	0.00287932	ENST00000489835+ENST00000446477+ENST00000480290+ENST00000435512+ENST00000535159+ENST00000489517+ENST00000464607+ENST00000495931	protein_coding	2.22881
ENSG00000130475	FCHO1	4.52364613566096	-1.01217	0.258763789674384	-3.91154324038898	9.17082324116326e-05	0.00342958	ENST00000389133+ENST00000252771+ENST00000594202+ENST00000600676+ENST00000600209+ENST00000596309+ENST00000597474+ENST00000598539+ENST00000593385+ENST00000600201+ENST00000593833+ENST00000599236+ENST00000598067+ENST00000601247+ENST00000595549+ENST00000598086+ENST00000593870+ENST00000595023+ENST00000598960+ENST00000539407+ENST00000596951+ENST00000596536+ENST00000598932+ENST00000594068+ENST00000596507…	protein_coding	1.32684
ENSG00000272720	CTA-228A9.3	11.5782652333947	-1.0035	0.240754348299425	-4.16815496200175	3.0707515207545e-05	0.00158079	ENST00000609162	lincRNA	7.36384
ENSG00000197747	S100A10	14.5740513774346	-0.998511	0.214574952495348	-4.65343823953678	3.26445411976554e-06	0.000270082	ENST00000368811+ENST00000368809+ENST00000478574+ENST00000478348	protein_coding	13.6617
ENSG00000104852	SNRNP70	49.0825096571993	-0.994669	0.147730187820131	-6.73301373933381	1.66184363143948e-11	1.82357e-08	ENST00000601065+ENST00000598441+ENST00000598984+ENST00000401730+ENST00000221448+ENST00000597936+ENST00000595231+ENST00000601411+ENST00000599687+ENST00000544278	protein_coding	21.7425
ENSG00000255928	RP11-456I15.2	1.94029236953856	-0.994621	0.276140045784521	-3.60187280421061	0.000315932945546938	0.00865505	ENST00000538624	antisense	7.02248
ENSG00000103202	NME4	17.8697011494611	-0.990801	0.226072282761056	-4.38267368098898	1.17231640378552e-05	0.000754371	ENST00000397722+ENST00000454619+ENST00000448828+ENST00000444498+ENST00000460297+ENST00000219479+ENST00000382940+ENST00000433358+ENST00000450036+ENST00000468031	protein_coding	11.9014
ENSG00000225968	ELFN1	20.0256211066024	-0.988842	0.21804793277361	-4.5349740152981	5.76105776805124e-06	0.000441589	ENST00000424383+ENST00000561626+ENST00000541472	protein_coding	3.89545
ENSG00000092421	SEMA6A	13.8307190957431	-0.986668	0.239889378935854	-4.11301301460753	3.90528360096555e-05	0.00189352	ENST00000343348+ENST00000257414+ENST00000282394+ENST00000515129+ENST00000513137+ENST00000503865+ENST00000510263+ENST00000506114+ENST00000514316+ENST00000503402+ENST00000510024+ENST00000502996+ENST00000503962+ENST00000515009+ENST00000509665+ENST00000512156	protein_coding	2.26426
ENSG00000132780	NASP	27.0468271901923	-0.984606	0.23252458169957	-4.23441707578015	2.291453192732e-05	0.0012706	ENST00000437901+ENST00000437362+ENST00000464190+ENST00000527359+ENST00000528084+ENST00000402363+ENST00000537798+ENST00000453748+ENST00000525515+ENST00000527470+ENST00000529333+ENST00000531532+ENST00000530840+ENST00000528238+ENST00000350030+ENST00000534101+ENST00000470768+ENST00000372052+ENST00000351223+ENST00000530073+ENST00000481782+ENST00000531612+ENST00000527932+ENST00000534450+ENST00000472408	protein_coding	14.5028
ENSG00000074855	ANO8	14.6315740443082	-0.97953	0.188942273097781	-5.18428100864918	2.16849772454877e-07	3.22936e-05	ENST00000159087+ENST00000597643+ENST00000600711	protein_coding	3.07431
ENSG00000110786	PTPN5	35.6025894378303	-0.973878	0.175793598244345	-5.53989326078171	3.02656061710294e-08	6.64219e-06	ENST00000358540+ENST00000477854+ENST00000396167+ENST00000396171+ENST00000396170+ENST00000396166+ENST00000396168+ENST00000496201	protein_coding	11.0156
ENSG00000185710	RP11-645C24.2	0.303968387446436	-0.973356	0.276135422588838	-3.52492371801973	0.000423604755043995	0.010514	ENST00000523028+ENST00000540706+ENST00000543702+ENST00000380598+ENST00000457001+ENST00000381448+ENST00000517529	uncertain	5.24215
ENSG00000131386	GALNT15	11.3500246648123	-0.972575	0.269442513487826	-3.60958395679937	0.000306688501270764	0.0084803	ENST00000339732+ENST00000437509+ENST00000470031+ENST00000430410+ENST00000489467	protein_coding	1.8035
ENSG00000119147	C2orf40	3.92471048978339	-0.969601	0.273502706501705	-3.54512348641178	0.000392429191369925	0.00990527	ENST00000493478+ENST00000489174+ENST00000409944+ENST00000238044+ENST00000437659+ENST00000479337	protein_coding	4.87764
ENSG00000243071	RP11-613M5.2	0.306942620657577	-0.966058	0.275480535340176	-3.50681053996489	0.000453511921720701	0.0110588	ENST00000485945	pseduogene	2.07051
ENSG00000172086	KRCC1	14.5840484473073	-0.964971	0.250947614572446	-3.84530877213211	0.000120400729943741	0.00422144	ENST00000347055	protein_coding	5.69109
ENSG00000151067	CACNA1C	18.2514303920096	-0.960929	0.21836192567087	-4.40062515213765	1.0793944990391e-05	0.000721292	ENST00000543114+ENST00000399655+ENST00000335762+ENST00000480911+ENST00000406454+ENST00000399617+ENST00000399634+ENST00000399603+ENST00000402845+ENST00000399649+ENST00000327702+ENST00000399629+ENST00000344100+ENST00000399601+ENST00000399606+ENST00000347598+ENST00000399641+ENST00000399591+ENST00000399637+ENST00000399621+ENST00000399597+ENST00000399638+ENST00000399644+ENST00000399595+ENST00000491104…	protein_coding	1.66618
ENSG00000226210	ABC7-42389800N19.1	2.90422428964212	-0.959544	0.259333100488514	-3.70004368498942	0.000215562356910753	0.0065425	ENST00000400706	pseduogene	5.44681
ENSG00000066336	SPI1	2.09979984341996	-0.957477	0.273129197825467	-3.50558137372564	0.0004556112043445	0.0110786	ENST00000378538+ENST00000227163+ENST00000533030+ENST00000533968	protein_coding	1.2013
ENSG00000234630	LL22NC03-2H8.4	2.06416562171438	-0.954968	0.27323743371286	-3.49501229213839	0.000474039923017237	0.0113601	ENST00000412149	lincRNA	5.11092
ENSG00000267523	CTD-2537I9.12	0.951587521480731	-0.95478	0.266180398111226	-3.58696689108602	0.000334546782780376	0.00899996	ENST00000589456+ENST00000585940	antisense	1.9269
ENSG00000168255	POLR2J3	4.57865976954963	-0.953816	0.172958524670543	-5.51471070907569	3.49354127024203e-08	7.35726e-06	ENST00000489144+ENST00000464525+ENST00000379357+ENST00000379340+ENST00000486319+ENST00000503564+ENST00000443430+ENST00000508848+ENST00000506060+ENST00000608621+ENST00000504157+ENST00000508910+ENST00000513506+ENST00000507355+ENST00000511313+ENST00000513438+ENST00000504101+ENST00000511773+ENST00000504677+ENST00000502415	protein_coding	20.5555
ENSG00000181409	AATK	29.7929088443026	-0.952669	0.149959925339742	-6.35282647640901	2.11394136898391e-10	1.3773e-07	ENST00000326724+ENST00000374792+ENST00000570932+ENST00000417379+ENST00000573469+ENST00000573441+ENST00000572339+ENST00000576053+ENST00000575363+ENST00000572798	protein_coding	10.19
ENSG00000144285	SCN1A	13.1736442303692	-0.947392	0.263619420815725	-3.59378649694261	0.000325906923950694	0.0088016	ENST00000423058+ENST00000375405+ENST00000303395+ENST00000409050+ENST00000473295+ENST00000491429+ENST00000507401	protein_coding	2.37179
ENSG00000185033	SEMA4B	12.0911978277865	-0.94469	0.238479675156993	-3.9613002982554	7.45427121302795e-05	0.00296592	ENST00000559322+ENST00000379122+ENST00000332496+ENST00000558895+ENST00000559792+ENST00000411539+ENST00000560089+ENST00000558051+ENST00000559300+ENST00000561085+ENST00000560003+ENST00000558848+ENST00000558065+ENST00000558975+ENST00000559074+ENST00000560993+ENST00000561252+ENST00000559983+ENST00000559247+ENST00000561321+ENST00000560263	protein_coding	4.84808
ENSG00000264513	RP11-556O9.2	2.51236687921357	-0.943759	0.271740530833537	-3.47301368990548	0.000514649103488128	0.0119754	ENST00000582889	antisense	3.4292
ENSG00000236986	RP11-544A12.4	0.943896639868188	-0.94372	0.273863079236471	-3.44595709170847	0.000569040705134278	0.012812	ENST00000587264+ENST00000588378+ENST00000589540+ENST00000589667+ENST00000586290+ENST00000587408+ENST00000415391+ENST00000590461+ENST00000589128+ENST00000417798+ENST00000586662+ENST00000588325+ENST00000592466+ENST00000589095	antisense	1.04138
ENSG00000116704	SLC35D1	9.59837787361021	-0.941763	0.242361133142276	-3.88578219126073	0.000102000929883186	0.00369714	ENST00000235345+ENST00000506472	protein_coding	1.07976
ENSG00000165388	ZNF488	8.17803218357892	-0.941173	0.27577478327521	-3.41283100571271	0.000642917971569479	0.0140358	ENST00000395702+ENST00000433077+ENST00000442001+ENST00000436850+ENST00000586537+ENST00000494156+ENST00000412534+ENST00000444585+ENST00000425196	protein_coding	1.19223
ENSG00000266964	FXYD1	1.35779552877393	-0.940318	0.245597764689313	-3.82869138284007	0.000128826431173558	0.00444686	ENST00000351325+ENST00000455515+ENST00000588715+ENST00000588607+ENST00000588081+ENST00000589121+ENST00000590462+ENST00000587056+ENST00000592818+ENST00000589209	protein_coding	141.03
ENSG00000229043	AC091729.9	4.22689788931774	-0.940193	0.257892001701894	-3.6456860126757	0.000266679431597983	0.00767956	ENST00000423008+ENST00000422230+ENST00000413706	antisense	4.49632
ENSG00000176890	TYMS	1.82033984356567	-0.937251	0.276008210661785	-3.39573696941402	0.00068444098279152	0.0147841	ENST00000323274+ENST00000579128+ENST00000323224+ENST00000323250+ENST00000584122+ENST00000581920	protein_coding	1.70281
ENSG00000254184	TYW1B	2.49586582512316	-0.93133	0.275415067070886	-3.38155138691749	0.000720777501754258	0.0153342	ENST00000438125+ENST00000435769+ENST00000343721+ENST00000437915+ENST00000438904	protein_coding	1.31886
ENSG00000273477	RP11-196O16.1	7.32240935300471	-0.929225	0.245739257655437	-3.78134514635078	0.00015598323720895	0.00517026	ENST00000609163	lincRNA	3.54108
ENSG00000272871	RP11-408A13.4	4.22498591017607	-0.924781	0.275446926677072	-3.35738437950651	0.000786836438233272	0.0162263	ENST00000610061	lincRNA	2.57444
ENSG00000164877	MICALL2	22.3702213195937	-0.922722	0.189163500230773	-4.87790627546276	1.07217846247011e-06	0.000114635	ENST00000493998+ENST00000496184+ENST00000472100+ENST00000405088+ENST00000467394+ENST00000297508+ENST00000413446+ENST00000479007+ENST00000471899+ENST00000470807+ENST00000487187+ENST00000460198+ENST00000487156+ENST00000467783+ENST00000482839+ENST00000490608	protein_coding	24.4092
ENSG00000099958	DERL3	1.57065442698654	-0.916541	0.272802640482655	-3.3597212827661	0.000780211411776789	0.0161375	ENST00000290730+ENST00000404056+ENST00000406855+ENST00000464023+ENST00000493596+ENST00000476077+ENST00000318109+ENST00000488272+ENST00000464034+ENST00000464110	protein_coding	1.71337
ENSG00000065882	TBC1D1	8.52982531384693	-0.915883	0.25100713802559	-3.64883402824747	0.000263433220647142	0.00762822	ENST00000261439+ENST00000508802+ENST00000402522+ENST00000510573+ENST00000446803+ENST00000491553+ENST00000513936+ENST00000509761+ENST00000443855+ENST00000421339+ENST00000469803+ENST00000511238+ENST00000401554+ENST00000407365+ENST00000475531+ENST00000406664+ENST00000405444+ENST00000492180	protein_coding	4.50604
ENSG00000168140	VASN	6.62962971263502	-0.912862	0.246324595078019	-3.7059316475082	0.000210615098946594	0.0064598	ENST00000304735	protein_coding	1.66525
ENSG00000133048	CHI3L1	49.5973329514387	-0.910468	0.270938331277371	-3.36042692091515	0.000778221157425574	0.0161123	ENST00000255409+ENST00000473185+ENST00000404436+ENST00000478742+ENST00000472064	protein_coding	32.4311
ENSG00000116017	ARID3A	7.46015116000205	-0.909854	0.20651089969206	-4.40584202059877	1.05373742648623e-05	0.000710983	ENST00000585895+ENST00000263620+ENST00000592916+ENST00000592216+ENST00000587532+ENST00000585733+ENST00000590251+ENST00000590749	protein_coding	1.06492
ENSG00000255153	TOLLIP-AS1	2.69743646787962	-0.908655	0.275740676783668	-3.29532268380622	0.000983087227779429	0.0188386	ENST00000530897	antisense	2.30932
ENSG00000172828	CES3	4.75200836138343	-0.908295	0.262162388713074	-3.46462614530625	0.000530969053316674	0.0121784	ENST00000303334+ENST00000394037+ENST00000566453+ENST00000566746+ENST00000568118+ENST00000570236+ENST00000564715+ENST00000543856	protein_coding	1.38095
ENSG00000129538	RNASE1	49.7660781039766	-0.903896	0.249972539431432	-3.61598081377614	0.000299212538081493	0.00835111	ENST00000397967+ENST00000340900+ENST00000412779+ENST00000555698+ENST00000397970	protein_coding	42.275
ENSG00000269918	AF131215.9	5.24498714082206	-0.903744	0.269278804613674	-3.35616628201785	0.000790310361072214	0.0162657	ENST00000602575	sense_intronic	2.22532
ENSG00000167680	SEMA6B	37.6653336583935	-0.903134	0.166408204999896	-5.42722280900494	5.72376592461096e-08	1.07509e-05	ENST00000301293+ENST00000586582+ENST00000586965+ENST00000589889	protein_coding	7.85559
ENSG00000118777	ABCG2	11.9502145377734	-0.902856	0.270403096379416	-3.33892577740544	0.000841030327352244	0.0170399	ENST00000515655+ENST00000237612+ENST00000503830+ENST00000505480	protein_coding	2.68592
ENSG00000206417	H1FX-AS1	15.9418075993962	-0.900595	0.209578277212073	-4.29717930316222	1.72985265873494e-05	0.00101913	ENST00000511998+ENST00000383461+ENST00000537780+ENST00000502789+ENST00000433902	antisense	25.0127
ENSG00000207955	MIR219-2	8.33610939659971	-0.900553	0.274531972333372	-3.28032075217688	0.00103689129468258	0.0195987	ENST00000608502+ENST00000385220	lincRNA	3.75583
ENSG00000224660	SH3BP5-AS1	9.16953320673708	-0.898335	0.250601815486446	-3.58471156764983	0.0003374509257957	0.00902167	ENST00000420195+ENST00000413977+ENST00000436602	antisense	1.9029
ENSG00000129534	MIS18BP1	2.31208171304774	-0.892031	0.275725177709955	-3.23521823661126	0.00121549787140584	0.0218561	ENST00000310806+ENST00000470424+ENST00000496413+ENST00000469020+ENST00000554093+ENST00000454990+ENST00000555653+ENST00000453142+ENST00000494512+ENST00000492652+ENST00000451174	protein_coding	1.1456
ENSG00000175787	ZNF169	9.56933850597391	-0.889414	0.235725842007359	-3.77308530821302	0.000161241124003402	0.00525653	ENST00000395395+ENST00000492115+ENST00000340911+ENST00000375354+ENST00000480716+ENST00000481550	protein_coding	2.71399
ENSG00000103168	TAF1C	2.30379456015462	-0.888715	0.276205357963533	-3.21758682872956	0.00129273891756223	0.0228023	ENST00000341690+ENST00000564208+ENST00000564774+ENST00000567759+ENST00000541676+ENST00000378541+ENST00000566903+ENST00000566732+ENST00000544090+ENST00000563428+ENST00000570117+ENST00000568265+ENST00000562445+ENST00000570270+ENST00000537450+ENST00000562330+ENST00000565279+ENST00000561955+ENST00000569505+ENST00000564345+ENST00000569609+ENST00000564454+ENST00000566183+ENST00000565544	protein_coding	1.42508
ENSG00000254690	GS1-393G12.12	1.76210281564048	-0.888314	0.270402999495598	-3.28514788010658	0.00101928858618583	0.0193544	ENST00000525023	antisense	3.9782
ENSG00000168026	TTC21A	5.04626344378781	-0.887158	0.255588274350212	-3.47104402457017	0.000518438994145513	0.0120454	ENST00000301819+ENST00000431162+ENST00000479954+ENST00000430597+ENST00000431559+ENST00000493337+ENST00000490036+ENST00000459702+ENST00000425163+ENST00000440121+ENST00000466875+ENST00000471025+ENST00000473587+ENST00000472866+ENST00000493856+ENST00000481734+ENST00000465962+ENST00000490245+ENST00000460460	protein_coding	5.00745
ENSG00000214888	XXyac-YM21GA2.7	2.51877197644615	-0.885192	0.273601418191312	-3.23533431216308	0.0012150037906715	0.0218561	ENST00000399186	antisense	1.10571
ENSG00000172508	CARNS1	28.2048917158264	-0.884651	0.25283161708007	-3.49897210437141	0.000467055442257076	0.0112574	ENST00000525907+ENST00000529925+ENST00000423745+ENST00000531958+ENST00000531040+ENST00000445895+ENST00000531388+ENST00000307823+ENST00000524740	protein_coding	5.28177
ENSG00000187091	PLCD1	10.3373080852443	-0.883781	0.268756715325521	-3.28840469270217	0.00100756892275803	0.0192315	ENST00000461445+ENST00000417185+ENST00000334661+ENST00000463876+ENST00000495395+ENST00000484829+ENST00000495367+ENST00000479619+ENST00000473834	protein_coding	9.55438
ENSG00000160678	S100A1	5.89958276875446	-0.882883	0.218078692750795	-4.0484586676241	5.15560364079886e-05	0.00232158	ENST00000368698+ENST00000469893+ENST00000292169+ENST00000368696+ENST00000436839	protein_coding	12.2405
ENSG00000113971	NPHP3	17.9964993810719	-0.882298	0.243906538352521	-3.61736104873925	0.00029762201281091	0.00831786	ENST00000471702+ENST00000474871+ENST00000326682+ENST00000493732+ENST00000490993+ENST00000465756+ENST00000337331+ENST00000512094+ENST00000515289+ENST00000469232+ENST00000476742+ENST00000471145+ENST00000343113+ENST00000383282	protein_coding	5.3907
ENSG00000112394	SLC16A10	6.93825078319352	-0.879869	0.261250658669534	-3.36791270096806	0.000757395745129093	0.0158582	ENST00000368851+ENST00000419619+ENST00000465319+ENST00000439288+ENST00000368850	protein_coding	1.30057
ENSG00000230358	RP11-166O4.1	0.566474036965282	-0.877588	0.270310120901062	-3.24659573936197	0.00116794157987838	0.0213788	ENST00000442619+ENST00000413323	pseduogene	1.24877
ENSG00000235459	RPS26P31	0.829411288273362	-0.877047	0.254232657082135	-3.44978030445812	0.000561042938108806	0.0126985	ENST00000539597+ENST00000473326	pseduogene	3.61432
ENSG00000244752	CRYBB2	0.935158543633511	-0.876253	0.267899701858604	-3.27082636036254	0.00107233730479538	0.02	ENST00000398215	protein_coding	1.15405
ENSG00000168758	SEMA4C	6.95593799651576	-0.873938	0.218842406450689	-3.99345898909233	6.51163455416168e-05	0.00269903	ENST00000305476+ENST00000474420+ENST00000482925+ENST00000467747+ENST00000442264+ENST00000449330	protein_coding	2.71914
ENSG00000187790	FANCM	6.87468323212208	-0.873892	0.23958540171836	-3.64751658054401	0.000264787229344073	0.00765134	ENST00000556036+ENST00000267430+ENST00000542564+ENST00000554030+ENST00000556250+ENST00000554809+ENST00000555013+ENST00000557110+ENST00000555484+ENST00000553551	protein_coding	3.04492
ENSG00000214176	PLEKHM1P	1.68827915432058	-0.87227	0.27455441908738	-3.17703831946263	0.00148787375481646	0.0253724	ENST00000578036+ENST00000582986+ENST00000582201+ENST00000440036+ENST00000580919+ENST00000397718+ENST00000584585	uncertain	1.02772
ENSG00000167670	CHAF1A	8.16564124425505	-0.871289	0.221219519654167	-3.93857358001134	8.1967458191905e-05	0.00318832	ENST00000301280+ENST00000587580+ENST00000585854+ENST00000587739+ENST00000585371+ENST00000587368+ENST00000589648	protein_coding	2.87016
ENSG00000162039	MEIOB	1.00000663844887	-0.868817	0.274330568672155	-3.16704523597943	0.00153996361530909	0.0259553	ENST00000452149+ENST00000412554+ENST00000470044+ENST00000397344+ENST00000325962+ENST00000490154+ENST00000496541+ENST00000460494+ENST00000563416	protein_coding	1.33653
ENSG00000131981	LGALS3	10.4944934164737	-0.868098	0.272485497784046	-3.18585205060301	0.00144328384572491	0.024924	ENST00000553493+ENST00000254301+ENST00000554715+ENST00000556438+ENST00000556322+ENST00000553755+ENST00000556263	protein_coding	7.06111
ENSG00000150782	IL18	2.99263709884109	-0.867845	0.271240074863043	-3.19954635751428	0.0013764404939135	0.0239945	ENST00000280357+ENST00000524595+ENST00000525547+ENST00000528832+ENST00000533858+ENST00000534225	protein_coding	2.16303
ENSG00000160446	ZDHHC12	2.69969700527243	-0.86632	0.269496844218152	-3.21458223040436	0.00130634492584058	0.0229646	ENST00000372672+ENST00000372663+ENST00000372667+ENST00000467312+ENST00000452105+ENST00000406904	protein_coding	2.13909
ENSG00000117266	CDK18	17.5839541414214	-0.865615	0.228995060824234	-3.78005804258381	0.000156791803284778	0.00518059	ENST00000429964+ENST00000512922+ENST00000504648+ENST00000506784+ENST00000360066+ENST00000507067+ENST00000462976+ENST00000478560+ENST00000443813+ENST00000506215+ENST00000419301+ENST00000507240+ENST00000515494+ENST00000476153+ENST00000505932+ENST00000509056+ENST00000489617+ENST00000506489+ENST00000468954+ENST00000504162+ENST00000512008+ENST00000484080+ENST00000515514+ENST00000459862	protein_coding	5.58143
ENSG00000124749	COL21A1	3.82809901477082	-0.865223	0.275055793291232	-3.14562760224708	0.00165730881441266	0.027037	ENST00000370819+ENST00000244728+ENST00000488912+ENST00000370808+ENST00000535941+ENST00000467045+ENST00000482933+ENST00000467216+ENST00000461489+ENST00000484987+ENST00000469682+ENST00000456983+ENST00000370817	protein_coding	2.19842
ENSG00000162572	SCNN1D	4.7196091656352	-0.863458	0.258916746566349	-3.33488544857165	0.000853345442331419	0.0171566	ENST00000379116+ENST00000379101+ENST00000338555+ENST00000470022+ENST00000325425+ENST00000400928+ENST00000467651+ENST00000379099	protein_coding	1.36126
ENSG00000115138	POMC	11.5204302173697	-0.862665	0.268220519556476	-3.21625286395384	0.00129876341168437	0.0228892	ENST00000380794+ENST00000405623+ENST00000264708+ENST00000395826+ENST00000449220	protein_coding	9.01926
ENSG00000213139	CRYGS	4.09808923335927	-0.861491	0.275426846575957	-3.12783881280783	0.0017609672592404	0.0283847	ENST00000392499+ENST00000307944+ENST00000460288	protein_coding	4.89396
ENSG00000267885	FKSG48	0.745986612626632	-0.859818	0.265032391190274	-3.24419999952118	0.00117781014666925	0.0214757	ENST00000594612	protein_coding	3.3302
ENSG00000232931	LINC00342	10.8656503208881	-0.858642	0.23840926595541	-3.60154691381605	0.000316329323481719	0.00865505	ENST00000448494+ENST00000412393	lincRNA	6.50283
ENSG00000255014	ARL6IP1P3	4.70995920615323	-0.857961	0.179907229075737	-4.76890762733315	1.85227563025356e-06	0.000174743	ENST00000524544	pseduogene	6.49852
ENSG00000111358	GTF2H3	20.9468607554432	-0.857904	0.166772201013172	-5.1441646983665	2.68713718620984e-07	3.81116e-05	ENST00000542279+ENST00000543341+ENST00000228955+ENST00000538845+ENST00000539994+ENST00000537368+ENST00000543005+ENST00000537695+ENST00000536375+ENST00000543415+ENST00000538533+ENST00000543154+ENST00000539429	protein_coding	5.09613
ENSG00000223722	RP11-467L13.5	1.53493835881604	-0.854941	0.271469746429104	-3.14930660733727	0.00163658389689618	0.0268037	ENST00000393255+ENST00000453713	pseduogene	2.526
ENSG00000154258	ABCA9	19.2544275489233	-0.852719	0.207962363213975	-4.1003508040847	4.12524321347979e-05	0.00196813	ENST00000340001+ENST00000453985+ENST00000370732+ENST00000482072+ENST00000460872+ENST00000492580+ENST00000461623+ENST00000495634+ENST00000585714	protein_coding	3.13033
ENSG00000151208	DLG5	7.3399785461501	-0.852587	0.253325204815129	-3.36558148284783	0.000763825035728707	0.0159409	ENST00000372391+ENST00000475613+ENST00000424842+ENST00000372388+ENST00000463362+ENST00000459739+ENST00000468332+ENST00000489547+ENST00000484525+ENST00000476354+ENST00000466198	protein_coding	2.97521
ENSG00000110697	PITPNM1	41.8964041073096	-0.85082	0.156085502161043	-5.45098596765584	5.00913231790724e-08	9.76032e-06	ENST00000436757+ENST00000534749+ENST00000356404+ENST00000527370+ENST00000526450+ENST00000525568+ENST00000526602+ENST00000525521+ENST00000530381+ENST00000529203+ENST00000533391+ENST00000532703+ENST00000528559+ENST00000527527+ENST00000524901+ENST00000527103	protein_coding	8.92026
ENSG00000106948	AKNA	13.4745393411519	-0.850271	0.218013057270343	-3.90009272827241	9.61558527388877e-05	0.00353892	ENST00000374079+ENST00000307564+ENST00000374088+ENST00000492875+ENST00000374075+ENST00000223791+ENST00000491133+ENST00000490767+ENST00000312033	protein_coding	2.57041
ENSG00000079313	REXO1	10.5789567220001	-0.849177	0.258136589355977	-3.28964317178439	0.00100314507690376	0.0191877	ENST00000170168+ENST00000587404+ENST00000586291+ENST00000590936+ENST00000588743+ENST00000586343+ENST00000587524	protein_coding	11.4799
ENSG00000161021	MAML1	21.7174028270291	-0.848438	0.243759503627777	-3.48063574621485	0.000500225270642515	0.0118111	ENST00000292599+ENST00000503050+ENST00000507385+ENST00000511027	protein_coding	3.61293
ENSG00000099840	IZUMO4	1.2212383522341	-0.847482	0.276209226791786	-3.06825973849712	0.00215309386910338	0.0322485	ENST00000395307+ENST00000481489+ENST00000478879+ENST00000497445+ENST00000395296+ENST00000395301+ENST00000498554+ENST00000590985+ENST00000591894+ENST00000588003+ENST00000593185	protein_coding	2.04771
ENSG00000185615	PDIA2	23.6857445319839	-0.847067	0.210973012253888	-4.01504697588398	5.94339558871323e-05	0.00257083	ENST00000219406+ENST00000467212+ENST00000404312+ENST00000456379+ENST00000482665+ENST00000462950+ENST00000435833	protein_coding	29.4838
ENSG00000168298	HIST1H1E	2.11294976807389	-0.846631	0.273161019457313	-3.09938355351617	0.00193923791525112	0.0303765	ENST00000304218	protein_coding	1.93414
ENSG00000158869	FCER1G	17.3197661524831	-0.846095	0.268485087932665	-3.1513666635925	0.00162508342191923	0.0266922	ENST00000490414+ENST00000367992+ENST00000289902	protein_coding	21.3493
ENSG00000138604	GLCE	18.4594605565754	-0.844378	0.224814016949296	-3.75589351941822	0.000172724124495368	0.00553823	ENST00000559798+ENST00000261858+ENST00000559420+ENST00000559500	protein_coding	2.55977
ENSG00000147488	ST18	17.3234248267994	-0.84404	0.271661645401115	-3.10695420732059	0.00189025677083785	0.0297209	ENST00000276480+ENST00000522251+ENST00000521824+ENST00000521582+ENST00000518053+ENST00000522861+ENST00000518501+ENST00000517580+ENST00000520257+ENST00000521549+ENST00000518037+ENST00000517456+ENST00000519118+ENST00000518545+ENST00000521119+ENST00000518453+ENST00000520279+ENST00000519201+ENST00000524183+ENST00000522102+ENST00000520811+ENST00000524078+ENST00000520716+ENST00000523652	protein_coding	3.79059
ENSG00000130881	LRP3	3.32948926896387	-0.842229	0.235655500933868	-3.57398403380299	0.000351590377964325	0.00923359	ENST00000592484+ENST00000253193+ENST00000590275+ENST00000590278	protein_coding	1.33206
ENSG00000137135	ARHGEF39	1.68556517814669	-0.84185	0.275628538805586	-3.05429253900093	0.00225591983010252	0.03324	ENST00000490638+ENST00000475323+ENST00000343259+ENST00000378395+ENST00000378387+ENST00000490970+ENST00000488918+ENST00000468876	protein_coding	1.31276
ENSG00000107331	ABCA2	111.470813147374	-0.840815	0.142297831147987	-5.90883580315377	3.44533898453922e-09	1.28626e-06	ENST00000371605+ENST00000265662+ENST00000341511+ENST00000479446+ENST00000487109+ENST00000459850+ENST00000464520+ENST00000490486+ENST00000448336+ENST00000464157+ENST00000463603+ENST00000437791+ENST00000431584+ENST00000488535+ENST00000466707+ENST00000492260+ENST00000470535+ENST00000467624+ENST00000464876+ENST00000494046+ENST00000476211+ENST00000398207+ENST00000425423	protein_coding	15.6115
ENSG00000261529	RP13-487P22.1	4.98381942417085	-0.840777	0.249145263223377	-3.37464440957891	0.000739111259131887	0.0155945	ENST00000565581	sense_intronic	2.38142
ENSG00000214006	AL353671.4	0.978031039973681	-0.840565	0.274897050126018	-3.05774592491915	0.00223008570044991	0.0329869	ENST00000397218	pseduogene	2.94044
ENSG00000249780	RP11-352E6.2	2.6005039038518	-0.839933	0.23884987545753	-3.51657338938764	0.000437155787497244	0.0107227	ENST00000509155	pseduogene	7.29863
ENSG00000179168	GGN	0.659607919191182	-0.837438	0.272592343912595	-3.07212434058908	0.00212541170487495	0.0319717	ENST00000334928+ENST00000585737+ENST00000591809+ENST00000586599+ENST00000587676	protein_coding	1.31161
ENSG00000089472	HEPH	19.8173663794576	-0.837312	0.263418902055009	-3.17863274419239	0.00147971445338339	0.0253289	ENST00000519389+ENST00000374727+ENST00000458621+ENST00000429547+ENST00000441993+ENST00000419594+ENST00000343002+ENST00000425114+ENST00000336279+ENST00000471121	protein_coding	3.16263
ENSG00000108239	TBC1D12	19.3731561185771	-0.833956	0.251037188890807	-3.32204346919668	0.000893607712119394	0.0176261	ENST00000225235+ENST00000485048+ENST00000457045	protein_coding	17.7867
ENSG00000169427	KCNK9	4.15003637262056	-0.833939	0.270861735307054	-3.07883614197155	0.00207810945676286	0.0315102	ENST00000522317+ENST00000523477+ENST00000523653+ENST00000519923+ENST00000303015+ENST00000520439	protein_coding	1.27122
ENSG00000139567	ACVRL1	4.18091220965454	-0.833024	0.272395338683189	-3.05814161310794	0.00222714300743473	0.0329869	ENST00000551576+ENST00000388922+ENST00000547400+ENST00000550683+ENST00000419526+ENST00000552678+ENST00000547632+ENST00000550084	protein_coding	3.88835
ENSG00000233723	LINC01122	6.6030729789592	-0.832912	0.234265248533381	-3.55542272680907	0.000377371848156808	0.00965073	ENST00000422723+ENST00000452840+ENST00000429664+ENST00000429095+ENST00000449448+ENST00000455219+ENST00000427421+ENST00000422793	lincRNA	4.04133
ENSG00000224272	AC114730.3	0.849108166399346	-0.831767	0.2690646309656	-3.09132669631237	0.00199264262910902	0.0308872	ENST00000413820+ENST00000439270+ENST00000420272	antisense	1.68326
ENSG00000008394	MGST1	95.6896901606865	-0.830056	0.212732479477955	-3.90187634086735	9.54499187198243e-05	0.00352219	ENST00000010404+ENST00000536371+ENST00000543076+ENST00000396210+ENST00000539036+ENST00000537878+ENST00000539708+ENST00000535309+ENST00000396209+ENST00000540056+ENST00000540126+ENST00000538885+ENST00000396207+ENST00000538857+ENST00000542256+ENST00000535624+ENST00000534835+ENST00000359720	protein_coding	61.2971
ENSG00000234985	RP11-3L10.3	0.871191033707386	-0.828107	0.239948366302836	-3.45119000904382	0.000558120491662306	0.0126516	ENST00000416734	pseduogene	1.53663
ENSG00000011132	APBA3	3.36188116768199	-0.827979	0.263032855368093	-3.14781688379904	0.00164494704376232	0.0268984	ENST00000588984+ENST00000590064+ENST00000316757+ENST00000591678+ENST00000586991+ENST00000592826+ENST00000590238+ENST00000589934	protein_coding	1.69222
ENSG00000120327	PCDHB14	4.95556052661631	-0.827712	0.276128365248481	-2.99756198757299	0.00272148506521564	0.0381832	ENST00000515856+ENST00000239449	protein_coding	6.05107
ENSG00000236624	CCDC163P	6.33571005733709	-0.827453	0.27066049015292	-3.0571605599899	0.00223444553480665	0.0330163	ENST00000415578+ENST00000515561+ENST00000502793+ENST00000490551+ENST00000514299+ENST00000432082+ENST00000486476+ENST00000488405	protein_coding	2.80237
ENSG00000144134	RABL2A	4.74390873634436	-0.826975	0.215044786295753	-3.84559629997704	0.000120259621164378	0.00422144	ENST00000393167+ENST00000409842+ENST00000393165+ENST00000413545+ENST00000450954+ENST00000467600+ENST00000452831+ENST00000465711+ENST00000393166+ENST00000409875+ENST00000376439+ENST00000409121+ENST00000493876+ENST00000476236+ENST00000477218+ENST00000478880+ENST00000494909+ENST00000486403	protein_coding	8.07466
ENSG00000260426	RP5-912I13.1	17.7084113240025	-0.826589	0.250621655989468	-3.29815400081836	0.000973227413305212	0.0188059	ENST00000569431	sense_overlapping	5.70955
ENSG00000146670	CDCA5	3.63829908915788	-0.825267	0.259676200359332	-3.17806004702875	0.00148264041426504	0.0253581	ENST00000529290+ENST00000525464+ENST00000438878+ENST00000533015+ENST00000275517+ENST00000524733+ENST00000404147+ENST00000479032+ENST00000531401+ENST00000527430+ENST00000462902	protein_coding	1.23206
ENSG00000121989	ACVR2A	23.8828199583952	-0.823766	0.210627177097712	-3.91101609643028	9.19086460549423e-05	0.00342958	ENST00000535787+ENST00000241416+ENST00000487959+ENST00000462659+ENST00000404590+ENST00000465329+ENST00000495775	protein_coding	4.63772
ENSG00000119431	HDHD3	14.1483084938013	-0.822109	0.213102003113292	-3.85781705761409	0.000114404224151091	0.00407729	ENST00000374180+ENST00000238379+ENST00000485934	protein_coding	8.03596
ENSG00000054690	PLEKHH1	28.064794447946	-0.821675	0.255872081194105	-3.21127185499535	0.00132148855145606	0.0232112	ENST00000329153+ENST00000558386+ENST00000561456+ENST00000558981+ENST00000557971+ENST00000561135+ENST00000417684+ENST00000561370+ENST00000558296+ENST00000560100+ENST00000558366+ENST00000559981+ENST00000561057+ENST00000559766+ENST00000559832+ENST00000559168+ENST00000558214	protein_coding	8.55264
ENSG00000214300	SPDYE3	4.16883017983309	-0.820327	0.223972494801017	-3.66262489657898	0.000249643966391977	0.00735145	ENST00000437326+ENST00000332397+ENST00000380765	protein_coding	3.61871
ENSG00000134698	AGO4	13.7870986876611	-0.820141	0.236097449211557	-3.47374066436706	0.00051325684709963	0.0119697	ENST00000373210+ENST00000488778+ENST00000496257	protein_coding	1.30862
ENSG00000106009	BRAT1	31.827735055533	-0.817877	0.162171003871731	-5.04329711445289	4.57577902496024e-07	5.83725e-05	ENST00000340611+ENST00000469750+ENST00000467558+ENST00000493232+ENST00000473879+ENST00000421712	protein_coding	10.297
ENSG00000167281	RBFOX3	19.6026090276053	-0.816025	0.199587741299389	-4.08855368496451	4.34071097372183e-05	0.0020475	ENST00000583458+ENST00000415831+ENST00000582043+ENST00000453134+ENST00000580155+ENST00000581393+ENST00000578998+ENST00000582880+ENST00000582894+ENST00000584778+ENST00000580508+ENST00000582139+ENST00000578887+ENST00000582344	protein_coding	7.78343
ENSG00000145934	TENM2	79.9697787747919	-0.815868	0.205801790632777	-3.96433881973525	7.35996553671526e-05	0.00293962	ENST00000518659+ENST00000545108+ENST00000520393+ENST00000519204+ENST00000517586+ENST00000403607+ENST00000520394+ENST00000518693+ENST00000522488+ENST00000521126+ENST00000517941	protein_coding	6.78888
ENSG00000105464	GRIN2D	15.8070618117687	-0.815339	0.203218279019188	-4.01213419318377	6.01722769208168e-05	0.00258134	ENST00000263269	protein_coding	2.33034
ENSG00000167525	PROCA1	2.12891740411458	-0.814231	0.266890412264836	-3.05080819051931	0.00228226321897528	0.0334855	ENST00000301039+ENST00000439862+ENST00000581289+ENST00000415329+ENST00000495203+ENST00000473751+ENST00000579650+ENST00000584073+ENST00000422880+ENST00000578097	protein_coding	1.369
ENSG00000260038	RP11-407G23.4	0.617026697482865	-0.813167	0.274939098088064	-2.95762426394026	0.00310019763269596	0.0419987	ENST00000562409	sense_intronic	1.06706
ENSG00000169562	GJB1	15.3798475879285	-0.812167	0.27199346249071	-2.98597904888621	0.0028267200886366	0.039133	ENST00000374029+ENST00000374022+ENST00000447581+ENST00000361726	protein_coding	5.80677
ENSG00000236467	RP11-443A13.5	1.94051911429032	-0.81032	0.273213437148356	-2.965885525859	0.00301812805885013	0.0411543	ENST00000429850+ENST00000595702+ENST00000609102+ENST00000458661+ENST00000600782+ENST00000426234+ENST00000598613+ENST00000608791	antisense	1.18868
ENSG00000107859	PITX3	26.7006957930649	-0.809906	0.171252386052413	-4.72931355940121	2.25280224151591e-06	0.000207826	ENST00000539804+ENST00000370002	protein_coding	14.9855
ENSG00000111445	RFC5	7.98674451632876	-0.809214	0.260575048639753	-3.10549494454546	0.00189960867985379	0.0298455	ENST00000449641+ENST00000537315+ENST00000229043+ENST00000420967+ENST00000484086+ENST00000454402+ENST00000392542+ENST00000535092+ENST00000472603+ENST00000543153	protein_coding	3.34619
ENSG00000231865	SIK3-IT1	2.87413772008493	-0.808041	0.266350032105997	-3.03375439656158	0.0024153097502953	0.0349215	ENST00000454832	sense_intronic	20.3198
ENSG00000136859	ANGPTL2	4.30347525838697	-0.80634	0.27397746634766	-2.94308879372762	0.00324955200369596	0.0432354	ENST00000373425+ENST00000373417+ENST00000470194+ENST00000491991	protein_coding	1.76162
ENSG00000198089	SFI1	13.6785625771376	-0.804581	0.212917220229602	-3.77884639016444	0.000157556573605057	0.00519762	ENST00000465646+ENST00000540643+ENST00000432498+ENST00000465437+ENST00000411518+ENST00000444859+ENST00000400288+ENST00000382162+ENST00000524296+ENST00000450787+ENST00000486708+ENST00000414585+ENST00000443326+ENST00000443011+ENST00000400289+ENST00000476010+ENST00000484806+ENST00000452250+ENST00000478887+ENST00000467357+ENST00000417682+ENST00000425671+ENST00000488883+ENST00000466991+ENST00000491973…	protein_coding	8.6325
ENSG00000196218	RYR1	13.5630561354795	-0.804129	0.223482386089515	-3.59817727035823	0.000320455177293578	0.00872215	ENST00000355481+ENST00000360985+ENST00000359596+ENST00000594111+ENST00000594335+ENST00000599547+ENST00000600337+ENST00000601514+ENST00000596431+ENST00000593322+ENST00000593677	protein_coding	1.84053
ENSG00000142544	CTU1	3.89284102485287	-0.802806	0.234709417989551	-3.42042313524217	0.000625238018314832	0.0137506	ENST00000421832	protein_coding	1.37155
ENSG00000256185	RP11-612B6.2	1.30279810786214	-0.800957	0.261571276230485	-3.06209991773402	0.00219790072629198	0.0327548	ENST00000537724	lincRNA	4.15093
ENSG00000129646	QRICH2	6.16937565454346	-0.797537	0.246417885989924	-3.2365215846493	0.00120996075464464	0.0218561	ENST00000262765+ENST00000447564+ENST00000524722+ENST00000532549	protein_coding	2.75565
ENSG00000168395	ING5	31.1467574418081	-0.793223	0.180823387154791	-4.3867281289676	1.15068469738189e-05	0.000752395	ENST00000492488+ENST00000313552+ENST00000482774+ENST00000406941+ENST00000493261+ENST00000445620+ENST00000489509+ENST00000484145+ENST00000493578+ENST00000474238+ENST00000486061	protein_coding	4.93197
ENSG00000135315	KIAA1009	7.62165972267642	-0.790472	0.260267715052656	-3.03715046918115	0.00238826205528273	0.0346898	ENST00000403245+ENST00000257766+ENST00000461137+ENST00000487999+ENST00000497936+ENST00000435955	protein_coding	1.36251
ENSG00000162341	TPCN2	8.09557280223167	-0.790337	0.268233081090503	-2.94645551202705	0.00321438653827975	0.0429595	ENST00000294309+ENST00000535009+ENST00000542467+ENST00000534832+ENST00000442692	protein_coding	1.74355
ENSG00000076344	RGS11	45.3838690047659	-0.788465	0.174076169261537	-4.52942338618296	5.91448755282377e-06	0.000448404	ENST00000168869+ENST00000397770+ENST00000316163+ENST00000477143+ENST00000359740+ENST00000481672+ENST00000493449+ENST00000397768+ENST00000431291+ENST00000472466	protein_coding	16.9487
ENSG00000105327	BBC3	5.57886789804895	-0.787619	0.213114638918552	-3.69575502838519	0.000219234286697842	0.00662437	ENST00000341983+ENST00000300880+ENST00000449228+ENST00000601438+ENST00000439096+ENST00000598636	protein_coding	3.59593
ENSG00000271344	RP11-274B21.9	6.71894131752611	-0.78743	0.271470205790415	-2.90061379250344	0.00372432586125464	0.0474624	ENST00000605007	lincRNA	3.97948
ENSG00000135926	TMBIM1	24.4448272153466	-0.787347	0.235890338189089	-3.33776830160722	0.000844541414129267	0.0170619	ENST00000258412+ENST00000396809+ENST00000444881+ENST00000465082+ENST00000445635+ENST00000437694+ENST00000439306+ENST00000492966+ENST00000466012+ENST00000429501+ENST00000425694+ENST00000476429+ENST00000495113+ENST00000418569+ENST00000440422+ENST00000444183+ENST00000453776+ENST00000444000+ENST00000453281+ENST00000451181+ENST00000434015+ENST00000413976+ENST00000420341	protein_coding	7.97886
ENSG00000071967	CYBRD1	24.0101626337765	-0.78731	0.262673222732753	-2.99729796523846	0.00272384338436134	0.0381906	ENST00000409484+ENST00000321348+ENST00000468308+ENST00000474182+ENST00000445146+ENST00000375252+ENST00000494587	protein_coding	3.33812
ENSG00000269928	RP11-849F2.8	1.53649893943001	-0.787202	0.260756393087915	-3.01891545612395	0.00253681312908502	0.0362757	ENST00000602405	lincRNA	1.90565
ENSG00000132470	ITGB4	7.17422953257616	-0.785804	0.266087663093595	-2.95317691322568	0.00314521653959128	0.0423882	ENST00000579662+ENST00000339591+ENST00000200181+ENST00000450894+ENST00000580542+ENST00000449880+ENST00000584558+ENST00000582629+ENST00000584374+ENST00000584025+ENST00000583327+ENST00000579211+ENST00000584939+ENST00000578318	protein_coding	7.08843
ENSG00000272216	LL22NC03-2H8.5	10.1107958910212	-0.78383	0.259253351457826	-3.0234113493794	0.002499422467296	0.0358394	ENST00000606654	lincRNA	3.74119
ENSG00000163885	CCDC37	0.397971034669228	-0.7836	0.25304995880593	-3.09662334710696	0.00195738408362303	0.0304614	ENST00000393425+ENST00000352312+ENST00000508140+ENST00000510833+ENST00000505024+ENST00000533201+ENST00000503905+ENST00000507830+ENST00000506204	protein_coding	1.53391
ENSG00000144583	2004-03-01	16.8160534267917	-0.782766	0.178522165024983	-4.38469822743108	1.16146676652607e-05	0.000752395	ENST00000273067	protein_coding	2.68079
ENSG00000201136	RNU6-353P	2.2925522564557	-0.781978	0.24072210325295	-3.24846905711477	0.00116027827726332	0.0212759	ENST00000364266	snRNA	17.8525
ENSG00000215769	hsa-mir-6080	8.24877793644998	-0.781185	0.234425890217421	-3.33233378956686	0.000861208958542013	0.0172526	ENST00000400873+ENST00000578492+ENST00000579125	processed_transcript	20.277
ENSG00000109099	PMP22	57.7199036720471	-0.78078	0.244985557185443	-3.18704447589726	0.00143734670595647	0.0248691	ENST00000312280+ENST00000395938+ENST00000494511+ENST00000395936+ENST00000580584+ENST00000426385+ENST00000580497+ENST00000471150	protein_coding	19.0319
ENSG00000177125	ZBTB34	13.173693031635	-0.780601	0.247728846562528	-3.15102990708472	0.00162695829977395	0.0266922	ENST00000319119+ENST00000373452	protein_coding	1.29015
ENSG00000170604	IRF2BP1	18.290055519276	-0.779956	0.183611083381256	-4.24787090060492	2.15811689393575e-05	0.00121937	ENST00000302165	protein_coding	5.36951
ENSG00000138193	PLCE1	12.1571114350491	-0.777838	0.249114296598565	-3.12241360456671	0.00179374743880605	0.0287676	ENST00000260766+ENST00000371380+ENST00000371385+ENST00000371375+ENST00000464214	protein_coding	1.0358
ENSG00000196757	ZNF700	4.76742839320517	-0.776559	0.267652372744884	-2.90137230107316	0.00371532173816645	0.0474006	ENST00000254321+ENST00000482090	protein_coding	1.44963
ENSG00000085982	USP40	12.5885644557981	-0.774372	0.241323396906011	-3.2088566193546	0.00133263930235259	0.0233481	ENST00000450966+ENST00000251722+ENST00000483519+ENST00000427112+ENST00000464956+ENST00000450940+ENST00000496298+ENST00000454354+ENST00000473191+ENST00000430158+ENST00000409945+ENST00000483216+ENST00000452724+ENST00000485943+ENST00000427947+ENST00000484528+ENST00000443711	protein_coding	5.48935
ENSG00000167315	ACAA2	13.9325453377006	-0.77263	0.259218621489132	-2.98061052529168	0.00287674406685451	0.0395889	ENST00000285093+ENST00000589432+ENST00000587994+ENST00000591171+ENST00000586485+ENST00000585948+ENST00000586100	protein_coding	9.06637
ENSG00000125846	ZNF133	16.8966685303813	-0.772273	0.24502736730912	-3.15178097847414	0.00162277946923808	0.0266922	ENST00000377671+ENST00000360010+ENST00000396026+ENST00000402618+ENST00000401790+ENST00000538547+ENST00000434018+ENST00000535822+ENST00000316358+ENST00000425686+ENST00000462170	protein_coding	5.86844
ENSG00000068793	CYFIP1	22.1473790336864	-0.772169	0.223885424964693	-3.44894548774262	0.00056278030201442	0.0126985	ENST00000561185+ENST00000313077+ENST00000561274+ENST00000560848+ENST00000558430+ENST00000559393+ENST00000557859+ENST00000558549+ENST00000435939+ENST00000558826+ENST00000561296+ENST00000561020+ENST00000557890+ENST00000561263	protein_coding	5.38992
ENSG00000183549	ACSM5	3.53740721521532	-0.771975	0.265148281092947	-2.91148256250785	0.00359717985190013	0.0463079	ENST00000331849+ENST00000575584+ENST00000575070+ENST00000570305+ENST00000574748+ENST00000573920+ENST00000577024	protein_coding	1.26157
ENSG00000084764	MAPRE3	216.841166953001	-0.771222	0.159228126712678	-4.84350597655312	1.2756788228605e-06	0.000130376	ENST00000233121+ENST00000494788+ENST00000405074+ENST00000475633+ENST00000481222+ENST00000491354+ENST00000474367+ENST00000458529+ENST00000402218	protein_coding	95.1566
ENSG00000180448	HMHA1	3.90780749166344	-0.767457	0.234004886624346	-3.2796630453717	0.00103931136027093	0.0195987	ENST00000539243+ENST00000587186+ENST00000313093+ENST00000590214+ENST00000586866+ENST00000536472+ENST00000587602+ENST00000543365+ENST00000592335+ENST00000586033+ENST00000590577+ENST00000591293+ENST00000586937+ENST00000590512+ENST00000586378+ENST00000592297+ENST00000591169	protein_coding	1.84869
ENSG00000272777	RP11-571L19.8	6.13752687941436	-0.767278	0.264937220929846	-2.89607294606106	0.00377864554042104	0.0479787	ENST00000609071	lincRNA	6.3103
ENSG00000007952	NOX1	6.20445297587101	-0.767175	0.221125392338616	-3.46941214138835	0.000521598634950634	0.0120674	ENST00000372966+ENST00000372964+ENST00000427768+ENST00000217885+ENST00000372960	protein_coding	3.65072
ENSG00000266541	RP11-881L2.1	0.822972405450884	-0.765299	0.265801356037701	-2.8792150635958	0.00398666366639776	0.0498019	ENST00000584109	antisense	1.30752
ENSG00000123119	NECAB1	57.8240169194994	-0.765154	0.185816735914929	-4.11778929538567	3.82524187358249e-05	0.00188486	ENST00000417640+ENST00000522729+ENST00000521954+ENST00000523962+ENST00000522820+ENST00000521366	protein_coding	8.89876
ENSG00000110756	HPS5	10.3050939763502	-0.764947	0.245480471771157	-3.11612294040372	0.00183245858980527	0.0291863	ENST00000396253+ENST00000438420+ENST00000349215+ENST00000537258+ENST00000352460+ENST00000545561+ENST00000544218+ENST00000543728+ENST00000531848+ENST00000399287+ENST00000589545	protein_coding	1.63379
ENSG00000196924	FLNA	7.59288016665336	-0.763997	0.261664887852896	-2.919751981786	0.00350310059874196	0.0453923	ENST00000420627+ENST00000360319+ENST00000498411+ENST00000422373+ENST00000369850+ENST00000490936+ENST00000369856+ENST00000344736+ENST00000498491+ENST00000462590+ENST00000444578+ENST00000474358+ENST00000466325+ENST00000415241+ENST00000438732+ENST00000474072+ENST00000466319+ENST00000465144	protein_coding	3.71104
ENSG00000257307	RP11-317N8.4	1.76502544525257	-0.763613	0.2339489286308	-3.26401493975995	0.00109845373126336	0.0203751	ENST00000550416	pseduogene	1.76692
ENSG00000123104	ITPR2	8.70318329312238	-0.763381	0.262713438299367	-2.90575499243766	0.00366368197651311	0.0470056	ENST00000381340+ENST00000451599+ENST00000538984+ENST00000540429+ENST00000543958+ENST00000545902+ENST00000540791+ENST00000545235+ENST00000242737+ENST00000536627	protein_coding	1.14719
ENSG00000125510	OPRL1	31.2896799143345	-0.763051	0.181670685370608	-4.2001861656122	2.66695602649903e-05	0.00141845	ENST00000336866+ENST00000355631+ENST00000349451	protein_coding	7.28752
ENSG00000171476	HOPX	31.4577093618195	-0.762511	0.24829092977367	-3.071037932073	0.0021331604919077	0.032042	ENST00000554144+ENST00000420433+ENST00000508121+ENST00000337881+ENST00000381260+ENST00000556376+ENST00000556614+ENST00000555760+ENST00000317745+ENST00000381255+ENST00000553379+ENST00000503639+ENST00000503864+ENST00000557328+ENST00000605395+ENST00000506661	protein_coding	17.7204
ENSG00000101346	POFUT1	5.19654830606047	-0.762194	0.256486804908943	-2.97166954071314	0.00296185292023011	0.0405727	ENST00000375749+ENST00000539210+ENST00000375730+ENST00000486717+ENST00000465791+ENST00000434904	protein_coding	1.26058
ENSG00000173868	PHOSPHO1	4.40798989980513	-0.758948	0.249396085884714	-3.0431425853446	0.00234121372221802	0.034206	ENST00000310544+ENST00000413580+ENST00000514112+ENST00000511066+ENST00000512250+ENST00000574638+ENST00000503902	protein_coding	1.82298
ENSG00000158458	NRG2	6.68053462372069	-0.758113	0.211582157882613	-3.58306710145734	0.000339583329212444	0.00902167	ENST00000541337+ENST00000289422+ENST00000394770+ENST00000545385+ENST00000361474+ENST00000358522+ENST00000289409+ENST00000340391+ENST00000378238+ENST00000518130+ENST00000519478	protein_coding	1.53657
ENSG00000007541	PIGQ	98.8236608186876	-0.756711	0.156482935838384	-4.83573827341008	1.32652367763469e-06	0.000134911	ENST00000293874+ENST00000409527+ENST00000409439+ENST00000422307+ENST00000321878+ENST00000439574+ENST00000026218+ENST00000470411+ENST00000443147+ENST00000544860+ENST00000537901+ENST00000420990+ENST00000480424+ENST00000540241+ENST00000476438+ENST00000540548	protein_coding	26.3066
ENSG00000188747	NOXA1	6.13887947764966	-0.754874	0.242531090665483	-3.11248324903304	0.00185520541843463	0.0294362	ENST00000341349+ENST00000392815	protein_coding	3.04649
ENSG00000124574	ABCC10	11.8466143127541	-0.754629	0.239668784602281	-3.14863342248712	0.00164035822618901	0.0268444	ENST00000372515+ENST00000372530+ENST00000443426+ENST00000244533+ENST00000463024+ENST00000469856+ENST00000502549+ENST00000372512+ENST00000437104+ENST00000505344	protein_coding	9.96395
ENSG00000215835	RP11-9L18.2	8.71362955849809	-0.754086	0.177116468718715	-4.25757294906825	2.06658236356002e-05	0.00117401	ENST00000400979	pseduogene	3.49925
ENSG00000073670	ADAM11	21.9624594580426	-0.753658	0.19928419108631	-3.78182767897973	0.000155681120105979	0.00516846	ENST00000200557+ENST00000355638+ENST00000535346+ENST00000587773+ENST00000588363	protein_coding	3.41475
ENSG00000112365	ZBTB24	13.3030555082349	-0.752539	0.23949973805498	-3.14212698244265	0.00167725277335548	0.0272769	ENST00000230122	protein_coding	1.67107
ENSG00000196313	POM121	5.78681806801696	-0.751628	0.244430816538199	-3.07501416590625	0.00210492555699311	0.0317472	ENST00000257622+ENST00000446813+ENST00000395270+ENST00000358357+ENST00000434423	protein_coding	3.50711
ENSG00000235605	RP5-827C21.1	0.577648522388217	-0.749962	0.251362114427592	-2.98359303463381	0.00284885411860705	0.0392829	ENST00000422958	pseduogene	1.50959
ENSG00000136404	TM6SF1	7.2317603975288	-0.749903	0.254128723446389	-2.9508780496157	0.00316871999426501	0.0425949	ENST00000322019+ENST00000379386+ENST00000379390+ENST00000379384+ENST00000258909+ENST00000565774+ENST00000564988+ENST00000565982+ENST00000561551	protein_coding	3.45473
ENSG00000240771	ARHGEF25	6.199705171083	-0.749882	0.20981930813541	-3.57394244414586	0.00035164625809205	0.00923359	ENST00000333972+ENST00000286494+ENST00000471370+ENST00000469072+ENST00000466399+ENST00000484357+ENST00000477314	protein_coding	5.20855
ENSG00000229359	PIN1P1	1.12403274075144	-0.747846	0.22682601969172	-3.29700483243303	0.000977218198502199	0.0188059	ENST00000412108+ENST00000439639	uncertain	1.06849
ENSG00000119714	GPR68	6.80583147968907	-0.74668	0.256529010152443	-2.91070493071721	0.00360614395959687	0.0463816	ENST00000531499+ENST00000535815+ENST00000238699+ENST00000529102+ENST00000529300	protein_coding	1.83718
ENSG00000110080	ST3GAL4	4.78715214998614	-0.742549	0.253718328965374	-2.92666860073631	0.00342613744211979	0.0447006	ENST00000534733+ENST00000531217+ENST00000227495+ENST00000444328+ENST00000356132+ENST00000530591+ENST00000534083+ENST00000528605+ENST00000526311+ENST00000528858+ENST00000534452+ENST00000392669+ENST00000526756+ENST00000526727+ENST00000449406+ENST00000532243+ENST00000534457+ENST00000524834+ENST00000524860+ENST00000533826	protein_coding	2.1859
ENSG00000165478	HEPACAM	11.5934967168775	-0.741518	0.25717865143059	-2.88327961433908	0.00393557927201377	0.0493887	ENST00000298251+ENST00000526273+ENST00000528971	protein_coding	3.84773
ENSG00000061273	HDAC7	9.0340207028367	-0.740451	0.253984460102829	-2.91533863110747	0.0035530279466709	0.0458398	ENST00000354334+ENST00000080059+ENST00000470668+ENST00000548938+ENST00000459625+ENST00000548080+ENST00000549883+ENST00000552960+ENST00000477203+ENST00000380610+ENST00000547259+ENST00000427332+ENST00000471235+ENST00000488927+ENST00000477937+ENST00000491464+ENST00000463732+ENST00000485796+ENST00000425451+ENST00000430670+ENST00000422254+ENST00000440293+ENST00000447463+ENST00000434070+ENST00000421231…	protein_coding	2.0468
ENSG00000108669	CYTH1	46.0949104997756	-0.740095	0.151721397679451	-4.87798759781854	1.07173661841164e-06	0.000114635	ENST00000361101+ENST00000589296+ENST00000446868+ENST00000591455+ENST00000589297+ENST00000585509+ENST00000586299+ENST00000586175+ENST00000591574+ENST00000586430+ENST00000590775+ENST00000589768+ENST00000586043+ENST00000587308+ENST00000590300+ENST00000591095+ENST00000592497	protein_coding	15.1798
ENSG00000126803	HSPA2	27.3010853111457	-0.739527	0.252075379410906	-2.9337515426429	0.0033489216809347	0.0441906	ENST00000394709+ENST00000247207+ENST00000554883	protein_coding	6.71748
ENSG00000146830	GIGYF1	24.8276284262688	-0.739444	0.165520319621038	-4.46739057580135	7.91794889151283e-06	0.000559598	ENST00000275732+ENST00000472105+ENST00000471340+ENST00000464111	protein_coding	2.66298
ENSG00000254879	AC103828.1	0.919076103487573	-0.737971	0.244921818756502	-3.01308952488214	0.00258602617363159	0.0367276	ENST00000533964	antisense	2.03777
ENSG00000250571	GLI4	10.3700977466704	-0.737763	0.223579925858491	-3.29977248483169	0.000967632400205099	0.0187667	ENST00000519876+ENST00000522479+ENST00000340042+ENST00000521682+ENST00000523522+ENST00000517468+ENST00000344692+ENST00000520021+ENST00000517530+ENST00000523812+ENST00000522033	protein_coding	12.5277
ENSG00000105245	NUMBL	54.0159273302235	-0.736532	0.142416698991202	-5.17166741697262	2.32014266419628e-07	3.40652e-05	ENST00000252891+ENST00000598779+ENST00000540131+ENST00000600967+ENST00000593367+ENST00000598773+ENST00000595741+ENST00000599786+ENST00000600636+ENST00000599594+ENST00000598759	protein_coding	16.0323
ENSG00000163376	KBTBD8	13.5917266032506	-0.733072	0.237585982951442	-3.08549981042413	0.00203210353660671	0.0311754	ENST00000295568+ENST00000417314+ENST00000460576+ENST00000469661+ENST00000484414+ENST00000460784	protein_coding	2.31484
ENSG00000181804	SLC9A9	12.6201586925476	-0.732409	0.227391600388783	-3.22091541104317	0.00127781857067648	0.0225965	ENST00000316549+ENST00000483124+ENST00000474727+ENST00000474151+ENST00000498717	protein_coding	3.39219
ENSG00000053900	ANAPC4	29.9398135058743	-0.731866	0.201699647013032	-3.62849338423532	0.000285080054208729	0.00807825	ENST00000315368+ENST00000510092+ENST00000505080+ENST00000505991+ENST00000507809+ENST00000507925+ENST00000503805+ENST00000505842+ENST00000504256+ENST00000515848+ENST00000506973	protein_coding	9.55943
ENSG00000107147	KCNT1	13.837397301355	-0.731331	0.217559680961551	-3.36151927699774	0.000775149457102567	0.0160967	ENST00000298480+ENST00000487664+ENST00000371757+ENST00000460750+ENST00000473941+ENST00000486577+ENST00000491806+ENST00000488444+ENST00000263604+ENST00000490355+ENST00000490363+ENST00000475008	protein_coding	1.86184
ENSG00000160360	GPSM1	26.8180340492741	-0.731159	0.185096682373671	-3.95014457292383	7.81040017589645e-05	0.00306088	ENST00000440944+ENST00000392945+ENST00000354753+ENST00000429455+ENST00000392944+ENST00000291775	protein_coding	9.51648
ENSG00000240204	SMKR1	6.71822073675839	-0.730755	0.237190766074705	-3.08087369767014	0.00206394177932718	0.0314254	ENST00000462322+ENST00000488846	protein_coding	5.27862
ENSG00000075035	WSCD2	21.8105994019963	-0.72968	0.199047691709921	-3.66585683939991	0.000246511808421632	0.00729011	ENST00000547525+ENST00000552195+ENST00000550529+ENST00000551106+ENST00000261400+ENST00000551638+ENST00000546401+ENST00000332082+ENST00000551057+ENST00000551734+ENST00000546811+ENST00000549903+ENST00000547185+ENST00000546629	protein_coding	4.13507
ENSG00000229487	ALG13-AS1	0.346940098879942	-0.728123	0.249210987542041	-2.92171294477288	0.00348112216376442	0.0451636	ENST00000430794	antisense	1.48908
ENSG00000178971	CTC1	14.6422245772264	-0.727483	0.228680606751362	-3.18121862487927	0.00146656909230522	0.0252281	ENST00000449476+ENST00000315684+ENST00000581729+ENST00000580299+ENST00000578441+ENST00000578537+ENST00000578240+ENST00000584439+ENST00000581967+ENST00000583254+ENST00000579066+ENST00000581671+ENST00000584842	protein_coding	6.39816
ENSG00000164124	TMEM144	77.42106485461	-0.727377	0.232535414263916	-3.12802631225064	0.0017598442594646	0.0283847	ENST00000505189+ENST00000505049+ENST00000511038+ENST00000296529+ENST00000512481+ENST00000514558+ENST00000509278+ENST00000513744+ENST00000511532+ENST00000502698+ENST00000514971+ENST00000508243+ENST00000503200+ENST00000514346+ENST00000504569+ENST00000503404+ENST00000512272	protein_coding	17.0855
ENSG00000228857	AC104653.1	2.62399920834293	-0.727066	0.251134798277835	-2.89512176783964	0.00379011477673972	0.048095	ENST00000420579+ENST00000446401	lincRNA	4.62243
ENSG00000102934	PLLP	18.4931469524038	-0.725078	0.240401438311641	-3.01611181827334	0.00256038820649111	0.0364628	ENST00000219207+ENST00000569059+ENST00000564018	protein_coding	7.90338
ENSG00000263327	TAPT1-AS1	6.06853330780838	-0.722722	0.222240114011388	-3.25198763450669	0.00114601007465127	0.0210698	ENST00000598538+ENST00000573308+ENST00000573950+ENST00000570786	antisense	2.39574
ENSG00000167566	NCKAP5L	8.61099393131937	-0.72208	0.249898522984533	-2.88949314782093	0.00385863416419527	0.0487863	ENST00000335999+ENST00000433948+ENST00000477361+ENST00000491441+ENST00000480927	protein_coding	1.79318
ENSG00000147799	ARHGAP39	17.9647155468901	-0.721258	0.200576211357839	-3.595928125936	0.000323237044260818	0.00875217	ENST00000276826+ENST00000377307+ENST00000540274+ENST00000528810	protein_coding	2.6232
ENSG00000075043	KCNQ2	76.5720350094535	-0.720908	0.152814269871778	-4.71754443082978	2.38708280089391e-06	0.000213598	ENST00000359689+ENST00000354587+ENST00000359125+ENST00000357249+ENST00000360480+ENST00000370224+ENST00000344462+ENST00000370221+ENST00000482957+ENST00000344425	protein_coding	32.1902
ENSG00000123191	ATP7B	9.13324287791258	-0.719858	0.231432526755262	-3.11044402982231	0.00186806294590925	0.0295503	ENST00000242839+ENST00000344297+ENST00000400366+ENST00000417240+ENST00000400370+ENST00000448424+ENST00000418097+ENST00000482841+ENST00000466629+ENST00000542656+ENST00000483772	protein_coding	1.11534
ENSG00000164118	CEP44	15.4204065016675	-0.714213	0.245316454273555	-2.91139400295399	0.00359819969364516	0.0463079	ENST00000503780+ENST00000457424+ENST00000396791+ENST00000515299+ENST00000505124+ENST00000514712+ENST00000503053+ENST00000296519+ENST00000426172+ENST00000508483	protein_coding	2.79954
ENSG00000101282	RSPO4	24.2301283180995	-0.712547	0.154020062809613	-4.6263286469862	3.72204530600595e-06	0.000305515	ENST00000217260+ENST00000400634	protein_coding	6.64759
ENSG00000103269	RHBDL1	23.2844218864104	-0.711397	0.193038713814421	-3.68525306599998	0.000228475507437972	0.00681472	ENST00000352681+ENST00000561556+ENST00000450775+ENST00000219551	protein_coding	12.053
ENSG00000157734	SNX22	13.1167683351187	-0.711337	0.220524867549517	-3.22565262813535	0.00125685800971559	0.022384	ENST00000557789+ENST00000325881+ENST00000558466+ENST00000561334+ENST00000560607+ENST00000560945+ENST00000560997	protein_coding	4.07985
ENSG00000130511	SSBP4	15.1182037264625	-0.71064	0.191850454087477	-3.70413691020499	0.000212111682370517	0.00648433	ENST00000597724+ENST00000348495+ENST00000270061+ENST00000601357+ENST00000598159+ENST00000607020+ENST00000601614+ENST00000602088+ENST00000600628+ENST00000600244+ENST00000601919+ENST00000601444+ENST00000593641+ENST00000599699	protein_coding	20.0107
ENSG00000160072	ATAD3B	9.70590097702181	-0.709844	0.223191610574872	-3.18042251766974	0.00147060460355278	0.0252767	ENST00000378741+ENST00000308647+ENST00000472194+ENST00000378736+ENST00000485748+ENST00000474481	protein_coding	4.01253
ENSG00000137218	FRS3	39.3138408371762	-0.709791	0.147383740569085	-4.81593614545217	1.46511373587832e-06	0.000146533	ENST00000259748+ENST00000373018+ENST00000426290+ENST00000422888+ENST00000466420	protein_coding	13.4378
ENSG00000230487	PSMG3-AS1	13.6681415669481	-0.709702	0.243280583562059	-2.91721678433069	0.00353170217751385	0.0456494	ENST00000437621+ENST00000457484+ENST00000437964+ENST00000533935+ENST00000532358+ENST00000524978	lincRNA	3.07905
ENSG00000198799	LRIG2	41.885702425842	-0.709484	0.184561659455047	-3.84415896757709	0.000120966576350529	0.0042316	ENST00000361127+ENST00000466069+ENST00000470000+ENST00000492207+ENST00000466161	protein_coding	2.8498
ENSG00000141569	TRIM65	6.29794303261825	-0.708883	0.219672551926849	-3.22699745634661	0.00125096572230497	0.02233	ENST00000591668+ENST00000592642+ENST00000269383+ENST00000543309+ENST00000540128+ENST00000540812	protein_coding	1.44424
ENSG00000220848	RPS18P9	4.85796488909286	-0.708649	0.239790574474528	-2.95528158466751	0.00312383795939779	0.0422366	ENST00000482817	pseduogene	8.40309
ENSG00000014164	ZC3H3	14.6073155777436	-0.708358	0.222061600050059	-3.18991743568102	0.00142313445326762	0.0246846	ENST00000262577+ENST00000528401	protein_coding	3.39064
ENSG00000178904	DPY19L3	19.726497417841	-0.707924	0.227041448548082	-3.11803654873668	0.0018206022488212	0.0290896	ENST00000587077+ENST00000392250+ENST00000592503+ENST00000586987+ENST00000342179+ENST00000586427+ENST00000585597+ENST00000588648+ENST00000592142+ENST00000592832+ENST00000590651+ENST00000608291	protein_coding	2.56827
ENSG00000237949	LINC00844	69.1475996399685	-0.706912	0.229144035401857	-3.08501290796221	0.00203543319312174	0.0311806	ENST00000432535	lincRNA	88.8826
ENSG00000111271	ACAD10	15.2380801059378	-0.706576	0.2041340242971	-3.46133607720616	0.000537501346506796	0.0122608	ENST00000392636+ENST00000511915+ENST00000514615+ENST00000413681+ENST00000509936+ENST00000549590+ENST00000455480+ENST00000552965+ENST00000507135+ENST00000515283+ENST00000313698+ENST00000502746+ENST00000552706+ENST00000507683+ENST00000514847+ENST00000503490+ENST00000508303+ENST00000552177+ENST00000504803+ENST00000546647+ENST00000550198+ENST00000505487+ENST00000507688+ENST00000547491+ENST00000512792	protein_coding	4.15761
ENSG00000160055	TMEM234	12.0217402120152	-0.705996	0.239904951564271	-2.94281516939964	0.00325242536229225	0.0432461	ENST00000466796+ENST00000489170+ENST00000491434+ENST00000495091+ENST00000461402+ENST00000483001+ENST00000545122+ENST00000373593+ENST00000309777+ENST00000344461+ENST00000484490+ENST00000485689+ENST00000487174	protein_coding	8.02163
ENSG00000149571	KIRREL3	20.8931421136308	-0.704701	0.1913905648903	-3.68200534780132	0.000231406555444134	0.00689228	ENST00000525144+ENST00000529097+ENST00000416561+ENST00000532647+ENST00000526519+ENST00000525704+ENST00000526764+ENST00000533026+ENST00000547738+ENST00000549874	protein_coding	4.47734
ENSG00000164778	EN2	35.3774965572947	-0.704627	0.201037443172988	-3.50495513425219	0.000456684237012824	0.0110843	ENST00000297375	protein_coding	7.66939
ENSG00000159214	CCDC24	26.7333382558444	-0.70349	0.19084922389615	-3.68610235806512	0.000227714793530751	0.00681151	ENST00000486064+ENST00000372318+ENST00000460543+ENST00000463846+ENST00000490563+ENST00000490064+ENST00000486504+ENST00000485811+ENST00000466180+ENST00000479055+ENST00000472562	protein_coding	19.7909
ENSG00000153443	UBALD1	18.3867855259403	-0.703423	0.182885852628607	-3.84624087259982	0.000119943853477301	0.00422144	ENST00000591897+ENST00000283474+ENST00000591401+ENST00000590965+ENST00000590891+ENST00000588691+ENST00000587615+ENST00000587649+ENST00000591113	protein_coding	19.3325
ENSG00000188486	H2AFX	37.9890511230825	-0.703206	0.137956368927911	-5.09731005087838	3.44513817018824e-07	4.69462e-05	ENST00000530167+ENST00000375167	protein_coding	18.1187
ENSG00000138606	SHF	17.9101024041103	-0.702526	0.201985652966862	-3.47809899364736	0.000504983392406645	0.0118297	ENST00000290894+ENST00000560540+ENST00000318390+ENST00000560734+ENST00000458022+ENST00000558294+ENST00000560471+ENST00000559566+ENST00000558685+ENST00000561239+ENST00000561091+ENST00000561278	protein_coding	6.81844
ENSG00000189308	LIN54	26.5107080935752	-0.701954	0.202014076400398	-3.47477997410056	0.000511272522078278	0.0119501	ENST00000505905+ENST00000395282+ENST00000395283+ENST00000340417+ENST00000510877+ENST00000446851+ENST00000442461+ENST00000510557+ENST00000508171+ENST00000506560+ENST00000505397+ENST00000509748	protein_coding	4.07431
ENSG00000189221	MAOA	77.5305850405655	-0.701467	0.193073174602848	-3.6331675371314	0.000279963106824705	0.00795225	ENST00000338702+ENST00000542639+ENST00000497485+ENST00000490604	protein_coding	11.8572
ENSG00000115808	STRN	29.9338733180668	-0.701059	0.197728998618311	-3.54555570993431	0.000391786161966999	0.00990527	ENST00000263918+ENST00000379213+ENST00000495595	protein_coding	2.46981
ENSG00000213918	DNASE1	9.36196390411325	-0.700193	0.209867578826559	-3.33635519482304	0.000848846361391696	0.0171157	ENST00000570769+ENST00000576050+ENST00000407479+ENST00000570761+ENST00000246949+ENST00000571460+ENST00000570520+ENST00000414110+ENST00000570376+ENST00000573804+ENST00000570807+ENST00000572237+ENST00000570664+ENST00000576792+ENST00000575479+ENST00000575152	protein_coding	4.96027
ENSG00000131653	TRAF7	12.2779376325614	-0.699863	0.213793573978266	-3.27354446828058	0.00106207677739861	0.0199309	ENST00000565383+ENST00000326181+ENST00000569686+ENST00000567653+ENST00000564067+ENST00000567645+ENST00000570169	protein_coding	3.95453
ENSG00000132600	PRMT7	27.6721806354165	-0.69906	0.178540391312117	-3.91541870531253	9.02474504853365e-05	0.00339119	ENST00000562381+ENST00000566657+ENST00000565745+ENST00000569571+ENST00000566341+ENST00000564050+ENST00000449359+ENST00000569047+ENST00000564441+ENST00000565356+ENST00000562050+ENST00000563520+ENST00000565983+ENST00000348497+ENST00000441236+ENST00000339507+ENST00000568975+ENST00000563562+ENST00000561806+ENST00000562456+ENST00000566430+ENST00000567542+ENST00000563443+ENST00000565761+ENST00000566687…	protein_coding	12.7099
ENSG00000167555	ZNF528	20.7603010098526	-0.698939	0.203349971933127	-3.43712556350182	0.000587922984497801	0.0130957	ENST00000391788+ENST00000360465+ENST00000391787+ENST00000436397+ENST00000493272+ENST00000494167+ENST00000531472+ENST00000598192+ENST00000594530+ENST00000448954+ENST00000479718+ENST00000598479	protein_coding	5.05126
ENSG00000185189	NRBP2	57.2559866662606	-0.698432	0.157715591946933	-4.42842926275409	9.49218394907151e-06	0.000650995	ENST00000533093+ENST00000529747+ENST00000442628+ENST00000423469+ENST00000327830+ENST00000527545+ENST00000530123+ENST00000533846+ENST00000532940+ENST00000531729+ENST00000530347	protein_coding	11.2735
ENSG00000169432	SCN9A	65.1608143100142	-0.69672	0.172082933662556	-4.04874323392319	5.1493400081032e-05	0.00232158	ENST00000409672+ENST00000303354+ENST00000375387+ENST00000409435+ENST00000452182+ENST00000454569+ENST00000472119	protein_coding	4.96813
ENSG00000198728	LDB1	16.6224420161372	-0.694802	0.231852993494995	-2.99673723885532	0.00272885813929923	0.0382095	ENST00000361198+ENST00000425280+ENST00000461873+ENST00000490751	protein_coding	8.35433
ENSG00000172613	RAD9A	3.44965237996159	-0.694312	0.224739552973786	-3.08940694574306	0.0020055652193442	0.0309275	ENST00000543808+ENST00000307980+ENST00000544620+ENST00000542139+ENST00000541132+ENST00000538013+ENST00000530934+ENST00000529100+ENST00000535644	protein_coding	1.46923
ENSG00000203709	C1orf132	83.233789550112	-0.694093	0.192215595274947	-3.61101176076378	0.000305004829125698	0.00845618	ENST00000608023+ENST00000385231+ENST00000385055+ENST00000487977+ENST00000415882	lincRNA	13.4899
ENSG00000143537	ADAM15	18.2584001596853	-0.693955	0.219383635078298	-3.16320255964628	0.00156043716749768	0.0261686	ENST00000473905+ENST00000533732+ENST00000480331+ENST00000527418+ENST00000368410+ENST00000355956+ENST00000368412+ENST00000360674+ENST00000359280+ENST00000449910+ENST00000356955+ENST00000526491+ENST00000529473+ENST00000531703+ENST00000477533+ENST00000271836+ENST00000461564+ENST00000368413+ENST00000485346+ENST00000487956+ENST00000531455+ENST00000531831+ENST00000447332+ENST00000472434+ENST00000534019…	protein_coding	18.891
ENSG00000197818	SLC9A8	11.6921709776633	-0.693531	0.218851980885574	-3.16894803433308	0.00152991746437307	0.0258068	ENST00000417961+ENST00000361573+ENST00000489787+ENST00000541138+ENST00000539601+ENST00000490250	protein_coding	1.90412
ENSG00000198887	SMC5	14.3501766312807	-0.692558	0.221486772391693	-3.12685769290423	0.00176685428043443	0.0284237	ENST00000361138+ENST00000475540+ENST00000471372	protein_coding	1.9025
ENSG00000197136	PCNXL3	42.4358032705974	-0.692308	0.157903681187808	-4.38436749839908	1.16323258464965e-05	0.000752395	ENST00000355703+ENST00000531045+ENST00000530174+ENST00000439247+ENST00000531280	protein_coding	6.98213
ENSG00000196338	NLGN3	32.137377929512	-0.691453	0.172561619094565	-4.00699213406301	6.14969103460795e-05	0.00261663	ENST00000536169+ENST00000374051+ENST00000395855+ENST00000358741+ENST00000476589	protein_coding	7.06955
ENSG00000172201	ID4	47.7388040468946	-0.689183	0.201547287380239	-3.41946082027868	0.000627453676030224	0.0137703	ENST00000378700	protein_coding	11.6486
ENSG00000198121	LPAR1	40.6586888537086	-0.687852	0.217535193585897	-3.1620250997497	0.0015667605913907	0.0262162	ENST00000374431+ENST00000541779+ENST00000374430+ENST00000358883+ENST00000538760+ENST00000441240	protein_coding	7.7559
ENSG00000105701	FKBP8	116.556642939439	-0.687788	0.165398515531531	-4.15837102701762	3.20525117492563e-05	0.00162753	ENST00000597960+ENST00000610101+ENST00000544835+ENST00000608443+ENST00000222308+ENST00000596558+ENST00000601844+ENST00000453489+ENST00000596015+ENST00000606531+ENST00000596494+ENST00000597611+ENST00000599540+ENST00000594844+ENST00000597547+ENST00000609656	protein_coding	58.3809
ENSG00000090470	PDCD7	22.8457343638877	-0.685475	0.175959469606384	-3.89564121127387	9.79392803286211e-05	0.00357607	ENST00000204549+ENST00000560313+ENST00000559051	protein_coding	5.38892
ENSG00000197119	SLC25A29	8.16087908487946	-0.684992	0.231254024591627	-2.96207663706041	0.00305571716203257	0.041504	ENST00000359232+ENST00000554912+ENST00000539621+ENST00000392908+ENST00000556505+ENST00000555927+ENST00000554224+ENST00000556715+ENST00000554291+ENST00000554060+ENST00000556868+ENST00000553359+ENST00000556873+ENST00000555051+ENST00000555949+ENST00000557438+ENST00000555888+ENST00000556844+ENST00000555475+ENST00000553574+ENST00000556201	protein_coding	3.8894
ENSG00000168890	TMEM150A	12.0595322125664	-0.683848	0.219451797157834	-3.11616376245914	0.00183220492550436	0.0291863	ENST00000306353+ENST00000431593+ENST00000334462+ENST00000444380+ENST00000409668+ENST00000463363+ENST00000422458+ENST00000451147+ENST00000417791+ENST00000425160+ENST00000433956+ENST00000455852	protein_coding	5.37091
ENSG00000105204	DYRK1B	21.661754833532	-0.683708	0.19184140550136	-3.56392137393706	0.000365355434902193	0.00947425	ENST00000323039+ENST00000593685+ENST00000348817+ENST00000430012+ENST00000597639+ENST00000601696+ENST00000600611+ENST00000601972	protein_coding	6.80703
ENSG00000264046	RN7SL312P	2.33760458646055	-0.682527	0.224884570419194	-3.03500856863098	0.00240528853252216	0.0348352	ENST00000582079	misc_RNA	5.89648
ENSG00000072310	SREBF1	30.0637888275587	-0.682348	0.191353398255648	-3.56590486739365	0.000362602898736375	0.00941458	ENST00000485080+ENST00000578469+ENST00000338854+ENST00000261646+ENST00000355815+ENST00000395751+ENST00000395757+ENST00000395756+ENST00000478616+ENST00000486311+ENST00000447641+ENST00000581707+ENST00000490796+ENST00000584760+ENST00000471445+ENST00000469356+ENST00000580540+ENST00000583080+ENST00000487401+ENST00000435530+ENST00000470247+ENST00000423161+ENST00000583732+ENST00000577897+ENST00000476994	protein_coding	7.41909
ENSG00000182185	RAD51B	3.57907021537849	-0.682255	0.23059230408448	-2.95870760145722	0.00308932076796114	0.0419058	ENST00000487861+ENST00000479335+ENST00000487270+ENST00000471583+ENST00000488612+ENST00000485181+ENST00000553334+ENST00000390683+ENST00000553734+ENST00000555907+ENST00000553595+ENST00000474051+ENST00000497460+ENST00000492236+ENST00000554244+ENST00000478014+ENST00000469165+ENST00000460526+ENST00000468382+ENST00000557045+ENST00000554183+ENST00000554575+ENST00000555782+ENST00000556251	protein_coding	2.89554
ENSG00000149177	PTPRJ	41.23155717595	-0.680566	0.217602885165201	-3.12755826426802	0.00176264879305137	0.0283847	ENST00000418331+ENST00000440289+ENST00000527952+ENST00000534219+ENST00000526550+ENST00000527026	protein_coding	5.10442
ENSG00000225840	AC010970.2	42.5159626871436	-0.679383	0.217878343120484	-3.11817597694811	0.0018197411403704	0.0290896	ENST00000445125	pseduogene	41.9761
ENSG00000101353	MROH8	8.73217065627511	-0.679062	0.220422847448578	-3.08072416130082	0.00206497852564614	0.0314254	ENST00000343811+ENST00000417458+ENST00000441008+ENST00000466091+ENST00000217333+ENST00000400441+ENST00000421643+ENST00000400440+ENST00000434295+ENST00000422138	protein_coding	6.24165
ENSG00000181523	SGSH	24.3185505463265	-0.678247	0.195429294429433	-3.47054974045498	0.000519394135192522	0.0120454	ENST00000575484+ENST00000571156+ENST00000572257+ENST00000326317+ENST00000575282+ENST00000534910+ENST00000573150+ENST00000576856+ENST00000570923+ENST00000576941+ENST00000574505+ENST00000572208+ENST00000571051+ENST00000576707+ENST00000570427+ENST00000571675+ENST00000575188+ENST00000571075	protein_coding	6.14393
ENSG00000080603	SRCAP	90.3350882168026	-0.678068	0.138125670922117	-4.90906350967316	9.15123410349753e-07	0.000102577	ENST00000411466+ENST00000344771+ENST00000395059+ENST00000262518+ENST00000380361+ENST00000483083+ENST00000474008	protein_coding	6.69043
ENSG00000149532	CPSF7	43.5991315684092	-0.677682	0.117720775891083	-5.75668750403143	8.57804927077939e-09	2.48394e-06	ENST00000394888+ENST00000340437+ENST00000439958+ENST00000494016+ENST00000448745+ENST00000537641+ENST00000477890+ENST00000544669+ENST00000539952+ENST00000535222+ENST00000544990+ENST00000544585+ENST00000413232+ENST00000537162+ENST00000543545+ENST00000541963+ENST00000536548+ENST00000450000+ENST00000449811+ENST00000413184+ENST00000536145+ENST00000545934+ENST00000463244+ENST00000489728+ENST00000474684	protein_coding	9.05203
ENSG00000183426	NPIPA1	9.41939483324891	-0.676305	0.205172708847224	-3.29627359548687	0.000979765491843531	0.0188059	ENST00000472413+ENST00000541836+ENST00000545831+ENST00000328085+ENST00000424549+ENST00000545479+ENST00000534720+ENST00000537062	protein_coding	96.3616
ENSG00000124302	CHST8	19.3897557912217	-0.675325	0.218863314742083	-3.08560212995135	0.00203140446577369	0.0311754	ENST00000434302+ENST00000591231+ENST00000438847+ENST00000604556+ENST00000262622	protein_coding	7.16272
ENSG00000174460	ZCCHC12	65.4078809880072	-0.675172	0.155692614560627	-4.33657244167883	1.44721744881988e-05	0.0008937	ENST00000310164	protein_coding	21.2805
ENSG00000105642	KCNN1	13.7923730657287	-0.671397	0.230458430517483	-2.91331131728897	0.0035761788049983	0.0460814	ENST00000222249+ENST00000594192+ENST00000609922	protein_coding	2.64409
ENSG00000270189	RP11-258C19.7	19.1288298152376	-0.669589	0.231631209303361	-2.89075458274625	0.00384318111507237	0.04865	ENST00000603385	lincRNA	6.92496
ENSG00000106459	NRF1	20.4100282035159	-0.669076	0.221719222136199	-3.01767097367122	0.00254725305229449	0.0363112	ENST00000353868+ENST00000393232+ENST00000539636+ENST00000477428+ENST00000454688+ENST00000311967+ENST00000223190+ENST00000393230+ENST00000393231	protein_coding	4.42079
ENSG00000142549	IGLON5	9.91169051148613	-0.668708	0.194481244535343	-3.43841811233063	0.000585123477918706	0.0130495	ENST00000270642	protein_coding	3.1039
ENSG00000005700	IBTK	52.1630386213821	-0.667784	0.179821687576739	-3.7135910312413	0.000204338915571311	0.00633026	ENST00000306270+ENST00000505222+ENST00000508381+ENST00000445419+ENST00000503400+ENST00000503631+ENST00000510291+ENST00000471036+ENST00000369751	protein_coding	10.933
ENSG00000232871	SEC1P	1.32145248703316	-0.667569	0.196025023371186	-3.40552875856309	0.000660360579109073	0.0143415	ENST00000483163+ENST00000474419+ENST00000430145+ENST00000521217+ENST00000473944	uncertain	3.95796
ENSG00000167549	CORO6	49.826852913995	-0.664918	0.181922958566078	-3.65494473006273	0.000257237389123909	0.00745917	ENST00000445145+ENST00000388767+ENST00000469090+ENST00000345068+ENST00000459686+ENST00000580212+ENST00000467534+ENST00000579388+ENST00000480954+ENST00000456796+ENST00000584969+ENST00000577909+ENST00000492276+ENST00000584602	protein_coding	15.8115
ENSG00000140859	KIFC3	14.736854848819	-0.662356	0.185718156522381	-3.56645719188384	0.000361839884854205	0.00940648	ENST00000379655+ENST00000465878+ENST00000445690+ENST00000565397+ENST00000421376+ENST00000541240+ENST00000540079+ENST00000543930+ENST00000562903+ENST00000564136+ENST00000539578+ENST00000565753+ENST00000565270+ENST00000563266+ENST00000565481+ENST00000562503+ENST00000569222+ENST00000562311+ENST00000569112+ENST00000562984+ENST00000567204+ENST00000566648+ENST00000561524+ENST00000569619+ENST00000565351…	protein_coding	7.97704
ENSG00000140400	MAN2C1	34.8924663191524	-0.662326	0.166679175524306	-3.97365658994674	7.07775893224132e-05	0.00287932	ENST00000267978+ENST00000563622+ENST00000565683+ENST00000569482+ENST00000564929+ENST00000562067+ENST00000561693+ENST00000566099+ENST00000566569+ENST00000563528+ENST00000567163+ENST00000564570+ENST00000564785+ENST00000567360+ENST00000563441+ENST00000563368+ENST00000569176+ENST00000566013+ENST00000563794+ENST00000565953+ENST00000563596+ENST00000566634+ENST00000562461+ENST00000562228+ENST00000563058…	protein_coding	25.7986
ENSG00000179862	CITED4	7.83001854036525	-0.66223	0.214457126898406	-3.08793502152331	0.00201552535819685	0.0310171	ENST00000372638	protein_coding	4.49326
ENSG00000069535	MAOB	34.2568536377733	-0.661741	0.229130084026999	-2.88805723068625	0.00387629337089862	0.0489502	ENST00000378069+ENST00000536181+ENST00000538942+ENST00000487544+ENST00000468431	protein_coding	9.30008
ENSG00000121310	ECHDC2	32.5560928046747	-0.661104	0.191928061284787	-3.44454146050618	0.000572028898734341	0.0128654	ENST00000371522+ENST00000460612+ENST00000539680+ENST00000371520+ENST00000463923+ENST00000543419+ENST00000479183+ENST00000358358+ENST00000498544+ENST00000536120+ENST00000476477+ENST00000479593+ENST00000467988+ENST00000487866+ENST00000486170+ENST00000487851+ENST00000541281+ENST00000488268+ENST00000544365+ENST00000495920+ENST00000492992+ENST00000544531+ENST00000480312+ENST00000493896+ENST00000487040…	protein_coding	21.0924
ENSG00000142185	TRPM2	76.7053349242321	-0.659146	0.145781718526634	-4.52145762841313	6.1415254361068e-06	0.000462255	ENST00000300482+ENST00000431901+ENST00000397928+ENST00000300481+ENST00000397932+ENST00000498430+ENST00000490982	protein_coding	10.4367
ENSG00000185049	NELFA	26.9364646905771	-0.657975	0.180636187811442	-3.64254142643228	0.000269959515187179	0.0077526	ENST00000382882+ENST00000411638+ENST00000467661+ENST00000542778+ENST00000333877+ENST00000416258+ENST00000463820+ENST00000453740+ENST00000431323+ENST00000455762+ENST00000488452+ENST00000421397+ENST00000484545+ENST00000411649+ENST00000443203+ENST00000458616	protein_coding	10.5448
ENSG00000189058	APOD	128.669922312425	-0.657746	0.18218386207073	-3.61034094283984	0.000305794779434419	0.00846682	ENST00000343267+ENST00000458447+ENST00000421243+ENST00000453131+ENST00000463719	protein_coding	73.8902
ENSG00000171608	PIK3CD	18.8055581241649	-0.656138	0.166827784397685	-3.93302786512877	8.38825094092726e-05	0.00322823	ENST00000536656+ENST00000377346+ENST00000484851+ENST00000361110+ENST00000481137+ENST00000479223+ENST00000543390	protein_coding	2.33648
ENSG00000161544	CYGB	37.0245967717082	-0.655359	0.158030348593116	-4.14704743448824	3.36790307059509e-05	0.00169199	ENST00000293230+ENST00000586160+ENST00000589342+ENST00000590175+ENST00000589145	protein_coding	13.7053
ENSG00000162522	KIAA1522	18.1974488400273	-0.653264	0.20559374053277	-3.17745254116481	0.00148575004219594	0.0253724	ENST00000401073+ENST00000468130+ENST00000373481+ENST00000294521+ENST00000373480	protein_coding	3.9316
ENSG00000123560	PLP1	706.005894068947	-0.652866	0.206727895988419	-3.15809371570766	0.00158804497245689	0.0263398	ENST00000434483+ENST00000429977+ENST00000455268+ENST00000422393+ENST00000433491+ENST00000418604+ENST00000443502+ENST00000361621+ENST00000303958+ENST00000465975+ENST00000494475+ENST00000464776+ENST00000480325+ENST00000485931+ENST00000495678+ENST00000479569+ENST00000485688+ENST00000478642+ENST00000461231+ENST00000476160+ENST00000466486+ENST00000494119+ENST00000496836	protein_coding	146.428
ENSG00000239223	RPL34P31	2.015866416981	-0.651632	0.179264715794437	-3.63502467319211	0.000277954032705932	0.00790595	ENST00000475295+ENST00000419419	pseduogene	4.3367
ENSG00000172943	PHF8	16.2850887148889	-0.651479	0.194798122884109	-3.34437810989043	0.000824672587691161	0.0167906	ENST00000357988+ENST00000338154+ENST00000338946+ENST00000396282+ENST00000470103+ENST00000443302+ENST00000322659+ENST00000494928+ENST00000413386+ENST00000448003+ENST00000490635+ENST00000425862+ENST00000437224+ENST00000415025+ENST00000453905+ENST00000445025+ENST00000433120+ENST00000462182	protein_coding	2.71637
ENSG00000157353	FUK	16.1063228192322	-0.650633	0.218998215314597	-2.97095086903881	0.00296879270846507	0.0406144	ENST00000288078+ENST00000428974+ENST00000464499+ENST00000378912+ENST00000571514+ENST00000571487+ENST00000574784+ENST00000576107+ENST00000572784+ENST00000576453+ENST00000573352+ENST00000498702+ENST00000573832+ENST00000485034	protein_coding	4.79426
ENSG00000143847	PPFIA4	13.3746887266899	-0.649237	0.223687447817596	-2.9024305348964	0.00370279269169053	0.0473036	ENST00000367240+ENST00000295706+ENST00000447715+ENST00000601609+ENST00000414050+ENST00000600426+ENST00000272198+ENST00000599966+ENST00000600447+ENST00000599514+ENST00000594656+ENST00000486360+ENST00000597023+ENST00000594572	protein_coding	2.10687
ENSG00000172824	CES4A	19.0983303266687	-0.646167	0.204314672154903	-3.16260868197353	0.00156362358152978	0.0261847	ENST00000540947+ENST00000338718+ENST00000541479+ENST00000398354+ENST00000326686+ENST00000567587+ENST00000538199+ENST00000535543+ENST00000540579+ENST00000535696+ENST00000543561+ENST00000544986+ENST00000535948+ENST00000397205+ENST00000544478	protein_coding	14.5147
ENSG00000165548	TMEM63C	42.7296849385765	-0.64534	0.152344254036953	-4.23606094127415	2.27475063664688e-05	0.0012706	ENST00000557408+ENST00000555338+ENST00000556514+ENST00000555588+ENST00000554766+ENST00000554346+ENST00000298351+ENST00000557504	protein_coding	6.19589
ENSG00000152377	SPOCK1	74.9380455612772	-0.644382	0.212070491749061	-3.0385257071332	0.00237738820095754	0.0345891	ENST00000394945+ENST00000515091+ENST00000282223+ENST00000509978+ENST00000508642+ENST00000510689+ENST00000510405+ENST00000505690+ENST00000503916+ENST00000509293	protein_coding	9.65479
ENSG00000162512	SDC3	108.205951454192	-0.643113	0.111880569341326	-5.74820896865618	9.01937268174316e-09	2.57596e-06	ENST00000336798+ENST00000339394+ENST00000471567+ENST00000487984	protein_coding	11.5443
ENSG00000182272	B4GALNT4	67.5322982628665	-0.642655	0.12523876603012	-5.13143527544243	2.87541102417883e-07	4.05064e-05	ENST00000530717+ENST00000329962+ENST00000524443+ENST00000526584+ENST00000534778	protein_coding	40.5943
ENSG00000234297	RP11-54D18.4	9.11860778123647	-0.64189	0.182222480919713	-3.52256252895161	0.000427396207247579	0.010556	ENST00000422292	pseduogene	7.96409
ENSG00000072858	SIDT1	18.2086589361691	-0.641823	0.195775706710617	-3.27835717335208	0.00104413188121782	0.0196472	ENST00000264852+ENST00000393830+ENST00000491730+ENST00000483946+ENST00000488390+ENST00000480746+ENST00000468728+ENST00000463226+ENST00000465803+ENST00000492863+ENST00000481891+ENST00000498152	protein_coding	2.54658
ENSG00000154639	CXADR	29.2571756363024	-0.641679	0.191181458303618	-3.35638868636303	0.000789675020129858	0.0162657	ENST00000284878+ENST00000400166+ENST00000306618+ENST00000400169+ENST00000400165+ENST00000356275	protein_coding	3.5886
ENSG00000114423	CBLB	16.4398361913175	-0.639973	0.222315136072383	-2.87867327964394	0.00399351824113358	0.0498162	ENST00000264122+ENST00000394030+ENST00000476370+ENST00000407712+ENST00000394027+ENST00000405772+ENST00000403724+ENST00000545639+ENST00000443752+ENST00000447441+ENST00000438603	protein_coding	2.60127
ENSG00000130702	LAMA5	19.5565450361732	-0.639846	0.192641948305465	-3.32142631638549	0.000895586261853675	0.0176485	ENST00000492698+ENST00000370691+ENST00000252999+ENST00000495695+ENST00000462415+ENST00000491036+ENST00000468786+ENST00000471042+ENST00000481120+ENST00000464134+ENST00000497363+ENST00000474128+ENST00000370692+ENST00000370677+ENST00000497053	protein_coding	7.39401
ENSG00000103056	SMPD3	12.9486923371204	-0.638625	0.206501010336151	-3.09260162606652	0.00198410285632499	0.0308016	ENST00000219334+ENST00000574662+ENST00000568373+ENST00000563226+ENST00000563396+ENST00000567223+ENST00000566009+ENST00000567811+ENST00000563455+ENST00000566466+ENST00000566723+ENST00000561749	protein_coding	2.7858
ENSG00000148356	LRSAM1	64.18155310823	-0.637149	0.13897882189859	-4.58450718830086	4.55058433088789e-06	0.000359376	ENST00000300417+ENST00000373324+ENST00000323301+ENST00000486587+ENST00000485704+ENST00000373322+ENST00000498513+ENST00000483302+ENST00000472068+ENST00000476755	protein_coding	79.1048
ENSG00000128159	TUBGCP6	38.1991339340133	-0.636706	0.189554862269632	-3.35895183828868	0.000782387016444859	0.0161665	ENST00000498611+ENST00000248846+ENST00000491449+ENST00000425018+ENST00000439308+ENST00000489511+ENST00000473946+ENST00000434349	protein_coding	7.58661
ENSG00000078687	TNRC6C	26.5023078495483	-0.634432	0.198472172772375	-3.19657881528789	0.00139067827734494	0.0242224	ENST00000588061+ENST00000588847+ENST00000301624+ENST00000335749+ENST00000585438+ENST00000588549+ENST00000541771+ENST00000544502+ENST00000591851+ENST00000587990+ENST00000592251+ENST00000592566	protein_coding	2.38674
ENSG00000168096	ANKS3	14.4336348640163	-0.633634	0.192501205552838	-3.29158590172263	0.000996241859276325	0.0190731	ENST00000446014+ENST00000592077+ENST00000590193+ENST00000304283+ENST00000591653+ENST00000590803+ENST00000589035+ENST00000591185+ENST00000585773+ENST00000588513+ENST00000588398+ENST00000592840+ENST00000450067+ENST00000590730+ENST00000586605+ENST00000592421+ENST00000592068+ENST00000586166+ENST00000592698+ENST00000586159+ENST00000586632+ENST00000589065+ENST00000593120+ENST00000592711+ENST00000591281…	protein_coding	6.96193
ENSG00000256603	RP11-667M19.2	6.92732938518787	-0.633166	0.185209982606913	-3.41863684825605	0.000629356612227723	0.0137975	ENST00000543486	antisense	8.57229
ENSG00000142459	EVI5L	62.6316457405731	-0.633011	0.141611221181917	-4.4700638242867	7.81962590369123e-06	0.000554529	ENST00000270530+ENST00000538904+ENST00000597440+ENST00000599036+ENST00000601984+ENST00000600802+ENST00000601766	protein_coding	10.9587
ENSG00000178162	FAR2P2	7.70767700045297	-0.632401	0.159466746663834	-3.96572322945679	7.31737323057576e-05	0.0029395	ENST00000424873+ENST00000449066+ENST00000430785+ENST00000423905+ENST00000433703+ENST00000413041+ENST00000438056+ENST00000415406	uncertain	28.0107
ENSG00000205581	HMGN1	21.7415359985966	-0.631725	0.195103198440506	-3.23789928345135	0.00120413310627763	0.0218005	ENST00000492280+ENST00000380749+ENST00000431390+ENST00000486741+ENST00000288344+ENST00000361263+ENST00000436324+ENST00000380748+ENST00000419378+ENST00000489072+ENST00000482192+ENST00000380747+ENST00000485550+ENST00000490032+ENST00000443046+ENST00000464078+ENST00000491183+ENST00000479586+ENST00000471260+ENST00000482733+ENST00000463631	protein_coding	17.3852
ENSG00000151849	CENPJ	33.6701589475804	-0.630529	0.193321039090305	-3.26156183524349	0.00110800263815254	0.020534	ENST00000381884+ENST00000545981+ENST00000471870+ENST00000493190+ENST00000418179	protein_coding	5.18365
ENSG00000125648	SLC25A23	58.3716484718852	-0.629148	0.114363015996825	-5.50132774189236	3.76941774762176e-08	7.70476e-06	ENST00000595810+ENST00000598704+ENST00000264088+ENST00000598908+ENST00000601322+ENST00000601760+ENST00000301454+ENST00000593600+ENST00000414491+ENST00000600682+ENST00000597039+ENST00000334510+ENST00000595267+ENST00000597307	protein_coding	16.6906
ENSG00000088247	KHSRP	40.5714353747839	-0.628632	0.132147347521933	-4.75705089603513	1.9644165456174e-06	0.00018366	ENST00000398148+ENST00000594745+ENST00000597656+ENST00000595223+ENST00000594496+ENST00000600480+ENST00000599642+ENST00000599395+ENST00000595112+ENST00000595548+ENST00000595258+ENST00000597704	protein_coding	22.6676
ENSG00000183092	BEGAIN	29.1116875108741	-0.628198	0.158254609103163	-3.96954018022058	7.20114633658865e-05	0.0029169	ENST00000355173+ENST00000443071+ENST00000556751+ENST00000556188+ENST00000553553+ENST00000554356+ENST00000557378+ENST00000554140+ENST00000554274+ENST00000554747	protein_coding	8.65746
ENSG00000181045	SLC26A11	64.4258275080661	-0.626706	0.13150874937124	-4.76551039323672	1.88376186249946e-06	0.000176912	ENST00000577155+ENST00000361193+ENST00000546047+ENST00000411502+ENST00000576126+ENST00000572652+ENST00000574967+ENST00000571602+ENST00000572725+ENST00000571564+ENST00000572226+ENST00000571176+ENST00000573809+ENST00000571888+ENST00000571072+ENST00000571215+ENST00000575019	protein_coding	16.5097
ENSG00000167978	SRRM2	145.140090212496	-0.625967	0.123087048927141	-5.0855594942725	3.66543905401776e-07	4.80634e-05	ENST00000301740+ENST00000576924+ENST00000575009+ENST00000576894+ENST00000575701+ENST00000576415+ENST00000571378+ENST00000574340+ENST00000570971+ENST00000575870+ENST00000573451+ENST00000571372+ENST00000570655+ENST00000573498+ENST00000572278+ENST00000576076+ENST00000572952+ENST00000576674+ENST00000574593+ENST00000572883+ENST00000572721+ENST00000573311+ENST00000571041+ENST00000570705+ENST00000576878…	protein_coding	123.97
ENSG00000139631	CSAD	21.8631090791249	-0.624449	0.214951966424628	-2.9050619075739	0.00367180467248933	0.047023	ENST00000267085+ENST00000379843+ENST00000475890+ENST00000379850+ENST00000379846+ENST00000444623+ENST00000453446+ENST00000490923+ENST00000490589+ENST00000485004+ENST00000548698+ENST00000483632+ENST00000472908+ENST00000424845+ENST00000454442+ENST00000542115+ENST00000437073+ENST00000491654+ENST00000424990+ENST00000498635+ENST00000461392	protein_coding	9.13529
ENSG00000160392	C19orf47	16.5004122760611	-0.623423	0.212514363189062	-2.93355724164074	0.0033510185663898	0.0441906	ENST00000582783+ENST00000392035+ENST00000577617+ENST00000582734+ENST00000584868+ENST00000357884+ENST00000582006+ENST00000580606+ENST00000580977	protein_coding	10.7147
ENSG00000182752	PAPPA	55.2128822912759	-0.62318	0.174956082427583	-3.5619200979501	0.000368152438675267	0.00949059	ENST00000328252+ENST00000534838+ENST00000460463+ENST00000483254	protein_coding	4.4712
ENSG00000183248	CTD-3193O13.9	47.6624927647437	-0.623006	0.169712213517751	-3.67095621252077	0.00024164473985752	0.00718695	ENST00000539422+ENST00000599142+ENST00000593356	protein_coding	15.6169
ENSG00000185133	INPP5J	13.841533670595	-0.622898	0.200352573010526	-3.10901072159315	0.00187714906352735	0.0296099	ENST00000463528+ENST00000412277+ENST00000331075+ENST00000412985+ENST00000461241+ENST00000420017+ENST00000404390+ENST00000405300+ENST00000400294+ENST00000402238+ENST00000404453+ENST00000401755	protein_coding	3.94577
ENSG00000165566	AMER2	47.1905848523308	-0.622567	0.160661949863465	-3.87501235544561	0.000106619289635812	0.00383408	ENST00000357816+ENST00000381853+ENST00000515384	protein_coding	4.2588
ENSG00000178947	LINC00086	223.110827565424	-0.622374	0.0857716805543674	-7.25617127976384	3.98200798593986e-13	5.93006e-10	ENST00000417443	lincRNA	31.0675
ENSG00000007047	MARK4	60.4861957216184	-0.622193	0.132562566057804	-4.69358205296487	2.6846223829905e-06	0.000234191	ENST00000587566+ENST00000262891+ENST00000300843+ENST00000590909+ENST00000588533+ENST00000588621+ENST00000592762+ENST00000592207+ENST00000590897	protein_coding	9.93094
ENSG00000063761	ADCK1	18.1881323271961	-0.621802	0.209491650181516	-2.96814853512961	0.00299599514035314	0.0409328	ENST00000238561+ENST00000556048+ENST00000393639+ENST00000557501+ENST00000341211+ENST00000555333+ENST00000556560+ENST00000555217	protein_coding	6.56969
ENSG00000157741	UBN2	55.1260935975927	-0.620315	0.183395147830443	-3.38239336151698	0.000718571701803432	0.0153141	ENST00000486663+ENST00000288561+ENST00000473989+ENST00000483726+ENST00000609762	protein_coding	2.79194
ENSG00000185236	RAB11B	169.59042766944	-0.620309	0.12914196904197	-4.80331426319365	1.56060653158738e-06	0.000153477	ENST00000600719+ENST00000328024+ENST00000598706+ENST00000594216+ENST00000601897	protein_coding	83.3431
ENSG00000149311	ATM	52.1931377382566	-0.619031	0.166251870951809	-3.72345031324271	0.000196518550552342	0.00611581	ENST00000527805+ENST00000278616+ENST00000527891+ENST00000532931+ENST00000530958+ENST00000452508+ENST00000526567+ENST00000601453+ENST00000533526+ENST00000525012+ENST00000419286+ENST00000533733+ENST00000524792+ENST00000531525+ENST00000531957+ENST00000533690+ENST00000534625+ENST00000529588+ENST00000532765+ENST00000525537+ENST00000527389+ENST00000533979+ENST00000525056+ENST00000525178+ENST00000527181	protein_coding	5.5999
ENSG00000070047	PHRF1	16.6605778182333	-0.618166	0.175858532693767	-3.51513084738808	0.000439537366435177	0.0107614	ENST00000264555+ENST00000534320+ENST00000416188+ENST00000413872+ENST00000533464+ENST00000532550	protein_coding	2.27311
ENSG00000160318	CLDND2	6.69158722383475	-0.617614	0.209465781020156	-2.94851943572626	0.00319300061390766	0.0428108	ENST00000291715+ENST00000601435+ENST00000593841	protein_coding	11.941
ENSG00000099365	STX1B	315.857089117065	-0.615688	0.128840327146458	-4.7786894747692	1.76441444434319e-06	0.000169522	ENST00000215095+ENST00000569638+ENST00000565419+ENST00000566211+ENST00000561836	protein_coding	50.3917
ENSG00000234456	MAGI2-AS3	30.5042288194446	-0.614641	0.188651210010924	-3.25808130727283	0.00112168263176226	0.0207322	ENST00000429408+ENST00000426835+ENST00000446159+ENST00000414797+ENST00000422093+ENST00000451809+ENST00000448195+ENST00000424477+ENST00000435749+ENST00000448636+ENST00000452320+ENST00000442765	uncertain	13.8212
ENSG00000204175	GPRIN2	21.8610512706687	-0.613348	0.199182856657313	-3.07932337236663	0.00207471351962564	0.031504	ENST00000374317+ENST00000374314	protein_coding	1.93911
ENSG00000065029	ZNF76	19.1300097793366	-0.610311	0.208961428458257	-2.92068912682629	0.00349258139049917	0.0452841	ENST00000491400+ENST00000229405+ENST00000469195+ENST00000486891+ENST00000484932+ENST00000460229+ENST00000373953+ENST00000440666+ENST00000339411+ENST00000482946+ENST00000479226+ENST00000498555	protein_coding	4.94715
ENSG00000080189	SLC35C2	27.3823166931741	-0.608532	0.171473820576357	-3.54883374785279	0.000386941299115664	0.00981428	ENST00000317734+ENST00000243896+ENST00000372230+ENST00000372229+ENST00000372227+ENST00000493599+ENST00000543605+ENST00000480329+ENST00000487729+ENST00000484318+ENST00000481809+ENST00000420518+ENST00000424568+ENST00000484188	protein_coding	11.8986
ENSG00000235034	C19orf81	5.23974193307922	-0.607859	0.181891265698034	-3.34188251648845	0.00083212272869603	0.0168764	ENST00000425202+ENST00000458538+ENST00000490451	protein_coding	8.93983
ENSG00000132321	IQCA1	30.80579986492	-0.606172	0.19824711225456	-3.05765631601987	0.00223075260737623	0.0329869	ENST00000409907+ENST00000254653+ENST00000309507+ENST00000431676+ENST00000409100+ENST00000479783+ENST00000479471+ENST00000418802+ENST00000467572+ENST00000465621	protein_coding	7.00871
ENSG00000102109	PCSK1N	372.606769226487	-0.60605	0.135122601958415	-4.48518797635841	7.28496814434242e-06	0.000520152	ENST00000218230+ENST00000478242	protein_coding	267.819
ENSG00000155592	ZKSCAN2	15.6049221577543	-0.603829	0.201617762032294	-2.9949217484998	0.00274515257112275	0.0383861	ENST00000328086+ENST00000569150+ENST00000565590	protein_coding	1.56718
ENSG00000173517	PEAK1	55.39213282032	-0.602798	0.181143797350874	-3.3277316346915	0.000875561665217698	0.0174185	ENST00000312493+ENST00000560626+ENST00000560854+ENST00000558305+ENST00000559791+ENST00000564328+ENST00000565820+ENST00000567808+ENST00000567337+ENST00000569819+ENST00000569159+ENST00000569692	protein_coding	3.31776
ENSG00000143258	USP21	42.8446415168276	-0.601481	0.20763752002071	-2.89678180374553	0.00377011870914728	0.0478996	ENST00000492950+ENST00000368002+ENST00000289865+ENST00000479344+ENST00000368001+ENST00000486299+ENST00000487163+ENST00000482385+ENST00000493054+ENST00000485277	protein_coding	22.2798
ENSG00000228594	C1orf233	83.3006430643574	-0.600654	0.141833381473602	-4.23492968386547	2.28623233717223e-05	0.0012706	ENST00000422725	protein_coding	27.7324
ENSG00000114646	CSPG5	25.4385101144568	-0.599769	0.142594135393956	-4.20612732574193	2.59783909484017e-05	0.00139594	ENST00000264723+ENST00000383738+ENST00000456150+ENST00000465441	protein_coding	7.88415
ENSG00000223551	TMSB4XP4	1.9250836708066	-0.599137	0.182665681146799	-3.27996731711538	0.00103819112797684	0.0195987	ENST00000323496	pseduogene	2.18253
ENSG00000130643	CALY	245.231909602143	-0.598109	0.129802888306597	-4.60782605716404	4.0690082811406e-06	0.000328817	ENST00000252939+ENST00000467611+ENST00000467433+ENST00000368558+ENST00000368556+ENST00000368555	protein_coding	295.331
ENSG00000261675	RP5-1119A7.17	32.3393842160795	-0.597001	0.149319633590352	-3.99813927024498	6.38423852002747e-05	0.00267817	ENST00000562756	sense_overlapping	10.4888
ENSG00000100241	SBF1	54.0587439145736	-0.59685	0.149377770986707	-3.99557339940207	6.45378573475624e-05	0.00268573	ENST00000380817+ENST00000348911+ENST00000418590+ENST00000470434+ENST00000473724+ENST00000390679+ENST00000476293+ENST00000477234+ENST00000399627	protein_coding	20.809
ENSG00000110400	PVRL1	57.9173497538695	-0.595494	0.167611054217921	-3.55283386684327	0.000381105066956957	0.00968983	ENST00000531468+ENST00000341398+ENST00000264025+ENST00000524429+ENST00000340882+ENST00000532197+ENST00000524510	protein_coding	7.51452
ENSG00000102858	MGRN1	37.8545158481629	-0.595442	0.163689176712669	-3.63763696765306	0.000275150878114101	0.00783691	ENST00000591895+ENST00000262370+ENST00000415496+ENST00000536343+ENST00000587747+ENST00000399577+ENST00000586183+ENST00000588994+ENST00000590790+ENST00000593224+ENST00000587145+ENST00000590457+ENST00000588015+ENST00000591673+ENST00000592256+ENST00000588111+ENST00000585676	protein_coding	5.62331
ENSG00000111676	ATN1	149.101030009403	-0.595041	0.149288358665507	-3.98584809978983	6.72395197827171e-05	0.00275582	ENST00000356654+ENST00000396684+ENST00000541029+ENST00000537488	protein_coding	24.3237
ENSG00000175785	PRIMA1	28.9258782029118	-0.594625	0.199028742365002	-2.98763264760585	0.00281147260935562	0.0390516	ENST00000393143+ENST00000393140+ENST00000316227+ENST00000477603	protein_coding	5.43744
ENSG00000266753	RP11-690G19.3	41.6417440308216	-0.592633	0.139092061092257	-4.26072499498189	2.03764834651133e-05	0.00116392	ENST00000585086	lincRNA	16.7751
ENSG00000113504	SLC12A7	108.841060211759	-0.590068	0.173789960701796	-3.39529189211699	0.000685554693675054	0.0147841	ENST00000264930+ENST00000514994+ENST00000513223+ENST00000504576+ENST00000510943	protein_coding	15.2133
ENSG00000063244	U2AF2	26.6341241107428	-0.588311	0.143419069506272	-4.10204202044585	4.09519876196857e-05	0.00196278	ENST00000450554+ENST00000308924+ENST00000588850+ENST00000587196+ENST00000592867+ENST00000592874+ENST00000590551+ENST00000587275	protein_coding	6.29304
ENSG00000167291	TBC1D16	31.1358857188768	-0.588042	0.177295556918096	-3.31673374686213	0.000910763659032164	0.0178968	ENST00000310924+ENST00000576768+ENST00000340848+ENST00000572862+ENST00000570373+ENST00000574241+ENST00000573782+ENST00000574427+ENST00000571872	protein_coding	2.05403
ENSG00000255198	SNHG9	20.3378105810427	-0.586596	0.154955582630283	-3.78557702562896	0.000153352323680112	0.00509927	ENST00000531523+ENST00000564014+ENST00000459373	lincRNA	47.1471

## Sheet: padj<0.05 RPKMcontrol>1 
ensemblID.	refseq.Name	baseMean	log2FoldChange	lfcSE	stat	pvalue	padj	txID.	biotype.consensus.	Control_RPKM_AVERAGE
ENSG00000209082	MT-TL1	1691.2385990851	0.72774	0.182574607786843	3.98598525346753	6.72006856296283e-05	0.00275582	ENST00000386347	Mt_tRNA	13319.7
ENSG00000154277	UCHL1	4765.99286566312	0.280942	0.0734031015810525	3.82738295007323	0.000129512937860111	0.00446317	ENST00000514924+ENST00000503431+ENST00000284440+ENST00000381760+ENST00000512419+ENST00000505232+ENST00000504818+ENST00000508768+ENST00000512788+ENST00000472501+ENST00000514764+ENST00000510566	protein_coding	3125.74
ENSG00000149925	ALDOA	1998.90954402078	0.418001	0.0929359121046918	4.49773686594473	6.8680625317831e-06	0.000497195	ENST00000338110+ENST00000395248+ENST00000566897+ENST00000575627+ENST00000568435+ENST00000562240+ENST00000566280+ENST00000567249+ENST00000562302+ENST00000562168+ENST00000569545+ENST00000563060+ENST00000564521+ENST00000412304+ENST00000563987+ENST00000564546+ENST00000564595+ENST00000567555+ENST00000569798+ENST00000395240+ENST00000566012+ENST00000566846+ENST00000562679+ENST00000564688+ENST00000566146…	protein_coding	1589.82
ENSG00000110955	ATP5B	1356.08320394114	0.402813	0.0816238876485174	4.93499450963504	8.01530145441852e-07	9.23265e-05	ENST00000262030+ENST00000548474+ENST00000552919+ENST00000551182+ENST00000552104+ENST00000547808+ENST00000547250+ENST00000551020+ENST00000550162+ENST00000552959+ENST00000551570+ENST00000553007+ENST00000548647	protein_coding	1404.99
ENSG00000014641	MDH1	1072.44713973539	0.569612	0.101908705414093	5.58943308913635	2.27812126037385e-08	5.33669e-06	ENST00000233114+ENST00000485781+ENST00000409908+ENST00000442225+ENST00000409476+ENST00000485155+ENST00000436321+ENST00000462944+ENST00000454035+ENST00000472098+ENST00000432309+ENST00000539945+ENST00000544381+ENST00000421012+ENST00000394423+ENST00000484538+ENST00000495083	protein_coding	1075.21
ENSG00000170315	UBB	462.564332739696	0.644339	0.089563235615949	7.19423229337422	6.28131778662911e-13	8.18495e-10	ENST00000577958+ENST00000302182+ENST00000577640+ENST00000535788+ENST00000395839+ENST00000395837+ENST00000578706+ENST00000578649	protein_coding	1053.85
ENSG00000225630	MTND2P28	813.901211797413	-1.17229	0.270381391282206	-4.33567492695116	1.45313560330483e-05	0.0008937	ENST00000457540	pseduogene	1022.43
ENSG00000167552	TUBA1A	1646.4641149892	0.386387	0.0589079937453619	6.55915446939049	5.41137257444494e-11	4.51287e-08	ENST00000301071+ENST00000295766+ENST00000550767+ENST00000547939+ENST00000546918+ENST00000552924+ENST00000548363+ENST00000550254+ENST00000550811	protein_coding	983.866
ENSG00000111716	LDHB	963.544605139842	0.274039	0.0761099810460645	3.600571319054	0.000317518716417914	0.00867621	ENST00000350669+ENST00000396076+ENST00000470985+ENST00000542765+ENST00000396075+ENST00000470280+ENST00000450584+ENST00000539782+ENST00000544151+ENST00000535112	protein_coding	942.967
ENSG00000237973	hsa-mir-6723	1141.78055462199	-1.58032	0.253758743146508	-6.22763878204845	4.73517238337767e-10	2.59799e-07	ENST00000414273	pseduogene	942.843
ENSG00000165092	ALDH1A1	3352.45054096244	0.400693	0.122163616126462	3.27997252676319	0.0010381719574347	0.0195987	ENST00000297785+ENST00000376939+ENST00000482210+ENST00000419959+ENST00000446946+ENST00000493113+ENST00000493311	protein_coding	873.356
ENSG00000127184	COX7C	484.98743905298	0.352337	0.0851187066722155	4.13935949280824	3.48276830186957e-05	0.00173713	ENST00000247655+ENST00000511472+ENST00000505430+ENST00000509578+ENST00000515763+ENST00000513124+ENST00000510447	protein_coding	869.898
ENSG00000164405	UQCRQ	382.781058169905	0.454518	0.114697499392429	3.96275284982797	7.40904712648993e-05	0.00295356	ENST00000378670+ENST00000378667+ENST00000498309+ENST00000378665+ENST00000480372+ENST00000496429	protein_coding	854.94
ENSG00000142168	SOD1	1304.53323843718	0.433531	0.0980112562002188	4.42327454123542	9.72160761181693e-06	0.000664544	ENST00000270142+ENST00000389995+ENST00000476106+ENST00000470944	protein_coding	842.038
ENSG00000096384	HSP90AB1	2698.31194785416	0.263219	0.0539046671727844	4.88303778552981	1.04463843206101e-06	0.000113697	ENST00000353801+ENST00000371646+ENST00000371554	protein_coding	790.031
ENSG00000176340	COX8A	424.167477846574	0.296845	0.0710253339306471	4.17943011267943	2.92240509288734e-05	0.00151943	ENST00000314133	protein_coding	722.199
ENSG00000104904	OAZ1	953.131496917627	0.152166	0.050828644189285	2.99370078211868	0.00275616095447232	0.0384511	ENST00000582888+ENST00000592787+ENST00000602676+ENST00000322297+ENST00000583542+ENST00000581150+ENST00000593012+ENST00000588673+ENST00000586054+ENST00000589361+ENST00000592727+ENST00000590943+ENST00000589739	protein_coding	699.648
ENSG00000111775	COX6A1	275.484217164356	0.321419	0.0653763495183379	4.91644743035503	8.81288491766838e-07	0.000100956	ENST00000229379+ENST00000550009+ENST00000549525	protein_coding	693.717
ENSG00000126267	COX6B1	478.04748847375	0.542019	0.105008795295262	5.16164869024073	2.44784346705504e-07	3.49761e-05	ENST00000246554+ENST00000592141+ENST00000392201+ENST00000590618	protein_coding	651.227
ENSG00000103363	TCEB2	487.398555115189	0.429908	0.120390977343592	3.57093144335925	0.000355713999959682	0.00930525	ENST00000409906+ENST00000262306+ENST00000409477+ENST00000494946+ENST00000572954	protein_coding	644.561
ENSG00000111669	TPI1	837.247933762744	0.527389	0.0506805859412759	10.4061288240753	2.32484153692436e-25	2.42353e-21	ENST00000229270+ENST00000396705+ENST00000488464+ENST00000535434+ENST00000493987+ENST00000462761+ENST00000495834+ENST00000482209+ENST00000474253	protein_coding	618.689
ENSG00000164919	COX6C	550.63164561054	0.580372	0.120558601330427	4.81402354840821	1.47921365626113e-06	0.000146858	ENST00000522934+ENST00000520517+ENST00000520468+ENST00000297564+ENST00000517682+ENST00000520271+ENST00000606245+ENST00000524245+ENST00000522940+ENST00000518171+ENST00000523016	protein_coding	602.662
ENSG00000131143	COX4I1	663.342146078381	0.465037	0.0955054445643695	4.86921706474624	1.12041280227088e-06	0.000118576	ENST00000565078+ENST00000570123+ENST00000568339+ENST00000566115+ENST00000567241+ENST00000568794+ENST00000253452+ENST00000562336+ENST00000563774+ENST00000561569+ENST00000566405+ENST00000564544+ENST00000566617+ENST00000564903+ENST00000564648+ENST00000567266+ENST00000569997+ENST00000562929	protein_coding	599.564
ENSG00000166681	NGFRAP1	678.087906973462	0.485246	0.0997975541213932	4.86230760670936	1.16025130939035e-06	0.00012095	ENST00000361298+ENST00000372645+ENST00000372635+ENST00000372634+ENST00000299872	protein_coding	593.216
ENSG00000115310	RTN4	3341.78695304625	0.366119	0.0619205997567254	5.9127130864825	3.36518070223721e-09	1.28626e-06	ENST00000404909+ENST00000394611+ENST00000357732+ENST00000317610+ENST00000337526+ENST00000357376+ENST00000405240+ENST00000394609+ENST00000486085+ENST00000491592+ENST00000485749+ENST00000354474+ENST00000402434+ENST00000438462+ENST00000427710+ENST00000461004	protein_coding	555.478
ENSG00000133169	BEX1	810.720238674163	0.391898	0.0932276537415896	4.20366403751906	2.62628663276446e-05	0.00140399	ENST00000372728	protein_coding	538.273
ENSG00000112695	COX7A2	401.201750303002	0.569727	0.103133192008649	5.5241907871886	3.31007625479472e-08	7.04202e-06	ENST00000370081+ENST00000230459+ENST00000370089+ENST00000509698+ENST00000459637+ENST00000460985+ENST00000472311+ENST00000377978+ENST00000481061	protein_coding	533.141
ENSG00000117410	ATP6V0B	1234.12540514414	0.200025	0.0567643319760212	3.5237770860193	0.000425442006395378	0.010522	ENST00000472505+ENST00000472174+ENST00000532642+ENST00000236067+ENST00000471859+ENST00000472277+ENST00000461670+ENST00000468183+ENST00000473485+ENST00000496131+ENST00000498208+ENST00000532072+ENST00000498664	protein_coding	499.464
ENSG00000227097	RP11-742N3.1	78.9582749607478	-0.434161	0.13241488500825	-3.27879551566718	0.0010425114740619	0.0196344	ENST00000536099+ENST00000473748	pseduogene	497.129
ENSG00000142319	SLC6A3	2883.96184007666	-0.451424	0.0709487451014088	-6.36267999040375	1.98263489293725e-10	1.33342e-07	ENST00000270349+ENST00000453492+ENST00000512002+ENST00000511750+ENST00000513308	protein_coding	485.787
ENSG00000151552	QDPR	1166.71249448581	0.229488	0.069573446370766	3.29849592036532	0.000972042925571123	0.0188059	ENST00000513615+ENST00000281243+ENST00000507439+ENST00000428702+ENST00000501943+ENST00000508623+ENST00000514300+ENST00000505710+ENST00000511609	protein_coding	472.574
ENSG00000156411	C14orf2	385.514042133059	0.571208	0.0869695227161106	6.56791090469604	5.10260545631516e-11	4.43268e-08	ENST00000286953+ENST00000554880+ENST00000555030+ENST00000414262+ENST00000553430+ENST00000557040+ENST00000554287+ENST00000553449+ENST00000554089+ENST00000554713+ENST00000557260+ENST00000554528	protein_coding	472.154
ENSG00000133318	RTN3	1650.47754542136	0.230586	0.0499625657689013	4.61517549280402	3.92763289823138e-06	0.000318627	ENST00000341307+ENST00000356000+ENST00000542238+ENST00000538995+ENST00000339997+ENST00000377819+ENST00000540798+ENST00000537981+ENST00000536011+ENST00000543123+ENST00000543552+ENST00000545432+ENST00000338850+ENST00000354497	protein_coding	467.426
ENSG00000129559	NEDD8	228.807457355018	0.374977	0.080122537232875	4.68004259546782	2.86815321251076e-06	0.000246083	ENST00000250495+ENST00000396828+ENST00000527046+ENST00000531430+ENST00000560427+ENST00000526430+ENST00000524927+ENST00000533242	protein_coding	466.339
ENSG00000117632	STMN1	1093.88816739585	0.356105	0.0856401117952112	4.15816082014647	3.2082014053116e-05	0.00162753	ENST00000513116+ENST00000426559+ENST00000455785+ENST00000399728+ENST00000465604+ENST00000357865+ENST00000374291+ENST00000485226+ENST00000446334	protein_coding	465.44
ENSG00000105404	RABAC1	358.838783391544	0.250592	0.0722587986945384	3.46797671557704	0.000524392723329972	0.0120674	ENST00000222008+ENST00000601891+ENST00000600292+ENST00000598057+ENST00000601028+ENST00000595226+ENST00000601078+ENST00000596171+ENST00000601476+ENST00000599219	protein_coding	453.653
ENSG00000184009	ACTG1	1484.273895606	0.376838	0.0709479373751978	5.31146954648037	1.08744744713566e-07	1.81378e-05	ENST00000331925+ENST00000573283+ENST00000575842+ENST00000576917+ENST00000574671+ENST00000576209+ENST00000575087+ENST00000576544+ENST00000572105+ENST00000576214+ENST00000571691+ENST00000575994+ENST00000575659+ENST00000571721+ENST00000570382	protein_coding	453.092
ENSG00000135940	COX5B	528.644186642402	0.587653	0.100549451298337	5.84441698846202	5.0834545535535e-09	1.70943e-06	ENST00000258424+ENST00000464949+ENST00000491989+ENST00000494306	protein_coding	433.53
ENSG00000130770	ATPIF1	422.931040943205	0.439323	0.112650694205481	3.89987361573691	9.6242914262996e-05	0.00353892	ENST00000497986+ENST00000335514+ENST00000468425+ENST00000465645	protein_coding	432.327
ENSG00000140319	SRP14	629.081795317199	0.516124	0.0832655286014324	6.19852916864607	5.69932445576291e-10	2.82917e-07	ENST00000267884+ENST00000558527+ENST00000558720+ENST00000560773+ENST00000559439+ENST00000559475+ENST00000559081+ENST00000558243	protein_coding	431.59
ENSG00000097021	ACOT7	1029.01024675437	0.299626	0.0682270903074382	4.39159240033771	1.12523496724358e-05	0.000747135	ENST00000608083+ENST00000545482+ENST00000361521+ENST00000418124+ENST00000377860+ENST00000377855+ENST00000377845+ENST00000377842+ENST00000473466+ENST00000481175+ENST00000541130	protein_coding	431.343
ENSG00000092841	MYL6	457.301788541128	0.388057	0.0897954795654161	4.32156899759213	1.54923589424857e-05	0.000930836	ENST00000550697+ENST00000548580+ENST00000550184+ENST00000348108+ENST00000293422+ENST00000552297+ENST00000549017+ENST00000549566+ENST00000547703+ENST00000547649+ENST00000536128+ENST00000548725+ENST00000547408+ENST00000551589+ENST00000550639+ENST00000546630+ENST00000548400+ENST00000549392+ENST00000548293+ENST00000546845+ENST00000551954	protein_coding	430.442
ENSG00000111674	ENO2	1422.10128737142	0.292057	0.0777137513719228	3.75810656179456	0.000171203972753877	0.00550838	ENST00000537688+ENST00000541477+ENST00000229277+ENST00000537838+ENST00000536199+ENST00000544774+ENST00000538763+ENST00000539713+ENST00000542509+ENST00000545045+ENST00000535366+ENST00000441285+ENST00000535275+ENST00000543975+ENST00000534977	protein_coding	424.533
ENSG00000128524	ATP6V1F	381.6191916934	0.364498	0.0896723683273169	4.06477041531512	4.8079765757583e-05	0.00220311	ENST00000249289+ENST00000492758	protein_coding	413.743
ENSG00000100097	LGALS1	379.73724771179	0.570192	0.123807831215912	4.60545805076216	4.1155894726373e-06	0.000330145	ENST00000215909+ENST00000464120+ENST00000425542+ENST00000480207+ENST00000454173+ENST00000489315+ENST00000472321	protein_coding	392.481
ENSG00000067225	PKM	1351.04401737628	0.29998	0.0827821815734424	3.62373207529135	0.000290382410239963	0.00814829	ENST00000319622+ENST00000564440+ENST00000389093+ENST00000568883+ENST00000335181+ENST00000565184+ENST00000565143+ENST00000449901+ENST00000567118+ENST00000565154+ENST00000568459+ENST00000561609+ENST00000570166+ENST00000563986+ENST00000569857+ENST00000564993+ENST00000563275+ENST00000568743+ENST00000562784+ENST00000564178+ENST00000562997+ENST00000567087+ENST00000564276+ENST00000566809+ENST00000569050	protein_coding	381.658
ENSG00000173915	USMG5	192.089091837615	0.333848	0.108471562656178	3.07774624699995	0.00208572436047746	0.0316027	ENST00000369825+ENST00000337003+ENST00000309579+ENST00000369815+ENST00000369811	protein_coding	368.678
ENSG00000196405	EVL	526.010697738494	-0.284785	0.070949422181193	-4.01391594762388	5.97196199432045e-05	0.00257251	ENST00000402714+ENST00000544450+ENST00000554460+ENST00000392920+ENST00000557023+ENST00000555706+ENST00000553771+ENST00000555048+ENST00000553875+ENST00000554045+ENST00000557637+ENST00000557153+ENST00000556921+ENST00000557384+ENST00000553910+ENST00000554695+ENST00000554031+ENST00000553799+ENST00000554518+ENST00000553694+ENST00000555999+ENST00000555606+ENST00000555848+ENST00000556258	protein_coding	359.892
ENSG00000162188	GNG3	330.42706256438	0.717342	0.0864545374746602	8.29732705511822	1.06479944748954e-16	5.55e-13	ENST00000294117	protein_coding	355.11
ENSG00000167283	ATP5L	248.738157258169	0.337376	0.094160363884375	3.5829919804504	0.000339681040181224	0.00902167	ENST00000300688+ENST00000529790+ENST00000529770+ENST00000533172+ENST00000524422+ENST00000529460+ENST00000534385+ENST00000527186	protein_coding	354.452
ENSG00000107317	PTGDS	192.667979491866	-0.491087	0.159173311019688	-3.08523181636239	0.00203393558080966	0.0311805	ENST00000224167+ENST00000371625+ENST00000457950+ENST00000371623+ENST00000471521+ENST00000446677+ENST00000460340+ENST00000492068+ENST00000462514+ENST00000444903+ENST00000467871	protein_coding	337.108
ENSG00000127561	SYNGR3	1098.13311656278	-0.211245	0.0691888580799498	-3.05316390509449	0.00226442219467801	0.0332881	ENST00000563869+ENST00000248121+ENST00000568896+ENST00000562045+ENST00000564642	protein_coding	330.766
ENSG00000143153	ATP1B1	1566.30739234928	0.574496	0.112574266162688	5.10325980215823	3.33852175988667e-07	4.60959e-05	ENST00000367816+ENST00000367815+ENST00000494797+ENST00000499679+ENST00000367813	protein_coding	328.52
ENSG00000135404	CD63	241.611776163865	0.336782	0.0867350671331085	3.8828864502941	0.000103223778802287	0.00372983	ENST00000548898+ENST00000552067+ENST00000548117+ENST00000420846+ENST00000552692+ENST00000546939+ENST00000548160+ENST00000549117+ENST00000257857+ENST00000550050+ENST00000552754+ENST00000550776+ENST00000555199+ENST00000552164+ENST00000551173+ENST00000546457	protein_coding	326.197
ENSG00000203879	GDI1	1063.58571916809	-0.336275	0.0870909896467286	-3.8611920569601	0.000112835162230342	0.00402825	ENST00000447750+ENST00000445564+ENST00000475976+ENST00000434049+ENST00000415109+ENST00000481304+ENST00000485143+ENST00000491154+ENST00000489589+ENST00000471972+ENST00000468483+ENST00000476540+ENST00000465640+ENST00000460984	protein_coding	318.902
ENSG00000168653	NDUFS5	307.96409112246	0.681221	0.124358914446754	5.47786175794194	4.30496246333443e-08	8.714e-06	ENST00000372967+ENST00000372969	protein_coding	311.608
ENSG00000171951	SCG2	1498.77027746974	0.421274	0.0899388729875271	4.6840037598196	2.8132484345163e-06	0.000243375	ENST00000305409+ENST00000421386+ENST00000433889	protein_coding	310.801
ENSG00000090266	NDUFB2	217.373700883753	0.495768	0.130339368753382	3.80367316891261	0.000142566250669673	0.00480188	ENST00000482954+ENST00000472695+ENST00000476470+ENST00000462847+ENST00000464564+ENST00000476279+ENST00000247866+ENST00000465506+ENST00000204307+ENST00000476181+ENST00000464566+ENST00000460088+ENST00000471136+ENST00000475276+ENST00000479181+ENST00000461457	protein_coding	310.056
ENSG00000166922	SCG5	444.617622680034	0.467358	0.104077356542976	4.49048303368884	7.10618356527847e-06	0.000510886	ENST00000413748+ENST00000300175+ENST00000494364+ENST00000497208+ENST00000471027+ENST00000470349+ENST00000498069+ENST00000498607+ENST00000475752	protein_coding	309.936
ENSG00000184076	UQCR10	395.089708150672	0.332597	0.0913793670047676	3.63973498530263	0.000272918781619361	0.00781331	ENST00000330029+ENST00000401406	protein_coding	308.584
ENSG00000136888	ATP6V1G1	559.624694634603	0.201856	0.0668932560515911	3.01758151768919	0.00254800500733315	0.0363112	ENST00000374050+ENST00000473413	protein_coding	298.05
ENSG00000130643	CALY	245.231909602143	-0.598109	0.129802888306597	-4.60782605716404	4.0690082811406e-06	0.000328817	ENST00000252939+ENST00000467611+ENST00000467433+ENST00000368558+ENST00000368556+ENST00000368555	protein_coding	295.331
ENSG00000010256	UQCRC1	450.862129547558	0.278833	0.0780557970566231	3.57223033833399	0.000353953877112063	0.00927083	ENST00000471189+ENST00000203407+ENST00000480561+ENST00000415995+ENST00000460105+ENST00000472438+ENST00000412343+ENST00000467690+ENST00000463708+ENST00000493806	protein_coding	293.706
ENSG00000125743	SNRPD2	254.095682061943	0.362519	0.0979557129525458	3.7008438024626	0.00021488372364449	0.00654123	ENST00000342669+ENST00000585392+ENST00000587367+ENST00000588301+ENST00000391932+ENST00000588599+ENST00000590212+ENST00000587579	protein_coding	293.358
ENSG00000156467	UQCRB	285.785808764754	0.430696	0.098978536458975	4.35140974325604	1.35265002069235e-05	0.000846889	ENST00000287022+ENST00000517603+ENST00000521036+ENST00000518876+ENST00000517523+ENST00000518406+ENST00000521948+ENST00000523920+ENST00000519322	protein_coding	290.834
ENSG00000104725	NEFL	1859.27435701338	0.258302	0.0603003997888016	4.28358172839611	1.83908499925808e-05	0.00107104	ENST00000221169	processed_transcript	290.459
ENSG00000070087	PFN2	544.714836924929	0.250935	0.0731705679662117	3.42944635244127	0.000604813985798449	0.0133862	ENST00000239940+ENST00000452853+ENST00000423691+ENST00000481767+ENST00000460404+ENST00000468323+ENST00000494827+ENST00000497060+ENST00000490975+ENST00000497148+ENST00000498169+ENST00000475518+ENST00000481275+ENST00000498307+ENST00000489155+ENST00000461930+ENST00000461868	protein_coding	278.765
ENSG00000099795	NDUFB7	265.124372027523	0.342546	0.096146777432368	3.56273995578423	0.000367004184917503	0.00949059	ENST00000215565+ENST00000593353	protein_coding	271.479
ENSG00000102109	PCSK1N	372.606769226487	-0.60605	0.135122601958415	-4.48518797635841	7.28496814434242e-06	0.000520152	ENST00000218230+ENST00000478242	protein_coding	267.819
ENSG00000124172	ATP5E	229.482356796852	0.293338	0.0982830828337234	2.9846218144233	0.00283929123662739	0.0392029	ENST00000243997+ENST00000395659+ENST00000395663	protein_coding	265.407
ENSG00000159199	ATP5G1	214.380230277998	0.577963	0.108865823092131	5.30894881068022	1.10259291872274e-07	1.82444e-05	ENST00000355938+ENST00000513347+ENST00000503641+ENST00000514808+ENST00000506855+ENST00000393366+ENST00000504591+ENST00000513781+ENST00000502964+ENST00000515060	protein_coding	263.666
ENSG00000104722	NEFM	1026.37558186236	0.335451	0.0827782570083495	4.05240474249899	5.06938667377484e-05	0.00230265	ENST00000221166+ENST00000523467+ENST00000518131+ENST00000437366+ENST00000521540+ENST00000433454	protein_coding	261.667
ENSG00000159377	PSMB4	297.55992071254	0.410881	0.093696672991278	4.38522016000514	1.15868528450707e-05	0.000752395	ENST00000290541+ENST00000495288+ENST00000495805+ENST00000476467+ENST00000493673+ENST00000474100+ENST00000466425	protein_coding	259.123
ENSG00000163618	CADPS	1136.40809883921	0.236504	0.0602342073373675	3.92641240806123	8.62222708537979e-05	0.00328638	ENST00000383710+ENST00000473635+ENST00000486172+ENST00000357948+ENST00000474560+ENST00000283269+ENST00000466621+ENST00000462768+ENST00000469292+ENST00000478408+ENST00000478570+ENST00000463002+ENST00000491424+ENST00000468271+ENST00000478434+ENST00000542833+ENST00000490424+ENST00000490353	protein_coding	256.919
ENSG00000128245	YWHAH	813.505915295876	0.488233	0.064256369518461	7.59819717356096	3.00284570464615e-14	7.82579e-11	ENST00000248975+ENST00000397492+ENST00000443669+ENST00000479649+ENST00000471374+ENST00000420430	protein_coding	254.631
ENSG00000169567	HINT1	403.073175032744	0.559413	0.0961203671818469	5.81992057075968	5.88755993649969e-09	1.92175e-06	ENST00000304043+ENST00000511475+ENST00000508495+ENST00000513345+ENST00000506207+ENST00000504202+ENST00000508488+ENST00000506908+ENST00000513012+ENST00000520028	protein_coding	252.109
ENSG00000147684	NDUFB9	232.608480466169	0.599493	0.115569422688519	5.18729526710507	2.13370290043707e-07	3.2004e-05	ENST00000276689+ENST00000518008+ENST00000522532+ENST00000518657+ENST00000517367+ENST00000524241+ENST00000517830	protein_coding	251.673
ENSG00000102144	PGK1	514.483107344443	0.369844	0.0677735101260735	5.45705197409681	4.84104687010004e-08	9.61247e-06	ENST00000477335+ENST00000491291+ENST00000373316+ENST00000442431+ENST00000537456+ENST00000474281+ENST00000476531	protein_coding	243.904
ENSG00000135441	BLOC1S1	71.3973646477367	-0.319173	0.105166803879755	-3.03491971853876	0.00240599721731321	0.0348352	ENST00000257899+ENST00000548925+ENST00000549147+ENST00000553100+ENST00000547076+ENST00000548556+ENST00000551926	protein_coding	243.838
ENSG00000074800	ENO1	755.161375153517	0.334657	0.0607968482037521	5.50451659608099	3.70182590781123e-08	7.64152e-06	ENST00000234590+ENST00000464920+ENST00000497492+ENST00000486051+ENST00000492343+ENST00000489867	protein_coding	242.808
ENSG00000123349	PFDN5	200.760019985665	0.382923	0.116452816358256	3.28822822563524	0.00100820073081494	0.0192315	ENST00000551018+ENST00000351500+ENST00000550880+ENST00000550069+ENST00000550846+ENST00000243040+ENST00000547130+ENST00000552341+ENST00000551223+ENST00000549995+ENST00000334478+ENST00000552742+ENST00000550513+ENST00000547228+ENST00000549759+ENST00000552548+ENST00000550964+ENST00000548984+ENST00000553171	protein_coding	242.449
ENSG00000142669	SH3BGRL3	299.99412655569	0.747284	0.132810632006337	5.62669179401556	1.83698518345511e-08	4.5058e-06	ENST00000270792+ENST00000319041	protein_coding	241.347
ENSG00000154723	ATP5J	217.155044186414	0.303105	0.0930802090045722	3.25638334567504	0.00112841288208413	0.0208197	ENST00000400099+ENST00000400093+ENST00000400087+ENST00000400090+ENST00000457143+ENST00000284971+ENST00000400094+ENST00000486002	protein_coding	241.242
ENSG00000110717	NDUFS8	189.912325113935	0.467226	0.106415117011452	4.39059968915787	1.1303847632964e-05	0.000748171	ENST00000432321+ENST00000313468+ENST00000531796+ENST00000453471+ENST00000526446+ENST00000528492+ENST00000532399+ENST00000526339+ENST00000531228+ENST00000525628+ENST00000529645+ENST00000525419+ENST00000524810+ENST00000526542+ENST00000531282	protein_coding	237.565
ENSG00000057757	PITHD1	514.154339535697	0.240298	0.0744442207414673	3.22789014825601	0.00124706854030993	0.0222795	ENST00000246151+ENST00000415372+ENST00000374524	protein_coding	235.608
ENSG00000134248	LAMTOR5	236.736932844437	0.35466	0.0897511831200515	3.95159403332824	7.76323562272613e-05	0.00305388	ENST00000464240+ENST00000474861+ENST00000483260+ENST00000256644+ENST00000602318+ENST00000602858+ENST00000531779	protein_coding	234.414
ENSG00000150459	SAP18	406.784334608164	0.261169	0.0836749943693917	3.12123375277751	0.0018009501803351	0.0288609	ENST00000382533+ENST00000607003+ENST00000485646+ENST00000492245+ENST00000450573+ENST00000467636+ENST00000471009	protein_coding	232.971
ENSG00000165678	GHITM	837.186833712265	0.384658	0.0712075274915665	5.40192968706691	6.59277938191317e-08	1.2164e-05	ENST00000372134	protein_coding	229.251
ENSG00000154518	ATP5G3	486.73972163199	0.645557	0.0960037982362184	6.72429039586877	1.76450216920328e-11	1.83941e-08	ENST00000284727+ENST00000409194+ENST00000392541+ENST00000497075+ENST00000472782	protein_coding	226.043
ENSG00000100804	PSMB5	298.912627298909	0.368114	0.0870368406491378	4.22940495388873	2.34310244658667e-05	0.00128895	ENST00000555895+ENST00000361611+ENST00000493471+ENST00000425762+ENST00000334454+ENST00000460922	protein_coding	222.008
ENSG00000131100	ATP6V1E1	427.285568493373	0.228716	0.0761647877365259	3.00290379705224	0.00267416950618758	0.0376969	ENST00000253413+ENST00000399796+ENST00000399798+ENST00000473248+ENST00000413576+ENST00000481365+ENST00000484653+ENST00000478963+ENST00000460085	protein_coding	221.448
ENSG00000173064	HECTD4	367.777512241162	-0.257426	0.0761737858189832	-3.37946030193038	0.000726282954492012	0.0154198	ENST00000430131+ENST00000377560+ENST00000550722+ENST00000549306+ENST00000549141+ENST00000547085+ENST00000548140+ENST00000548588+ENST00000548896+ENST00000550968+ENST00000552437+ENST00000547519+ENST00000311694+ENST00000547352+ENST00000550724	protein_coding	220.978
ENSG00000075415	SLC25A3	411.644243425162	0.382461	0.0818177307774582	4.6745514301025	2.94596806081156e-06	0.000251723	ENST00000401722+ENST00000228318+ENST00000188376+ENST00000551917+ENST00000546766+ENST00000548046+ENST00000552981+ENST00000547534+ENST00000550695+ENST00000551265+ENST00000551123+ENST00000549338+ENST00000548847+ENST00000547908+ENST00000547444+ENST00000548480+ENST00000547869	protein_coding	220.657
ENSG00000131495	NDUFA2	200.535324708439	0.302828	0.0828008614613137	3.65730429771282	0.00025488172670949	0.00742299	ENST00000510680+ENST00000252102+ENST00000512088+ENST00000502960	protein_coding	220.597
ENSG00000105290	APLP1	300.483710108083	-0.349707	0.0807230349436495	-4.33217765795268	1.47641728826839e-05	0.000902693	ENST00000537454+ENST00000221891+ENST00000586861+ENST00000590561+ENST00000589743+ENST00000592316+ENST00000588808+ENST00000589298+ENST00000587274+ENST00000590926+ENST00000591165	protein_coding	215.017
ENSG00000163032	VSNL1	679.238309147451	0.330054	0.0936542387257916	3.5241750302898	0.000424803537892709	0.010522	ENST00000404666+ENST00000457525+ENST00000295156+ENST00000451533+ENST00000406397+ENST00000483921	protein_coding	213.199
ENSG00000138297	TIMM23	193.171415989069	0.434477	0.100209119739733	4.33570389831914	1.45294420802781e-05	0.0008937	ENST00000260867+ENST00000444743+ENST00000374064+ENST00000485812+ENST00000374065+ENST00000476778+ENST00000469116+ENST00000480051	protein_coding	211.418
ENSG00000179010	MRFAP1	547.344215816906	0.249197	0.0801546766724648	3.10895367608097	0.00187751152862225	0.0296099	ENST00000320912+ENST00000507420+ENST00000382581+ENST00000512914	protein_coding	210.477
ENSG00000140941	MAP1LC3B	701.6959992478	0.216291	0.0737637220685733	2.93221240259803	0.00336556480062007	0.0442601	ENST00000561823+ENST00000562778+ENST00000563720+ENST00000599768+ENST00000268607+ENST00000570189+ENST00000565788+ENST00000564844+ENST00000564638+ENST00000534986	protein_coding	210.38
ENSG00000197457	STMN3	546.166916702958	-0.325355	0.0744613938127344	-4.36943914738958	1.24566044701611e-05	0.000789385	ENST00000370053+ENST00000540534	protein_coding	206.739
ENSG00000078668	VDAC3	485.175013550573	0.407464	0.103705254314115	3.92905955417955	8.52787197077675e-05	0.00326834	ENST00000518563+ENST00000392935+ENST00000520115+ENST00000522069+ENST00000522572+ENST00000519072+ENST00000521348+ENST00000518495+ENST00000022615+ENST00000521158+ENST00000522010+ENST00000522178+ENST00000524291	protein_coding	204.616
ENSG00000164924	YWHAZ	575.143677387202	0.426294	0.087965235822683	4.84616666967524	1.25869785810894e-06	0.000129274	ENST00000395957+ENST00000395958+ENST00000457309+ENST00000395956+ENST00000353245+ENST00000523848+ENST00000521309+ENST00000522542+ENST00000522819+ENST00000395953+ENST00000395948+ENST00000395951+ENST00000419477+ENST00000521607+ENST00000480304+ENST00000518736+ENST00000517727+ENST00000521328+ENST00000418997+ENST00000437293+ENST00000523131+ENST00000523938+ENST00000492736	protein_coding	203.015
ENSG00000065518	NDUFB4	150.326114775264	0.709111	0.11885026609675	5.96642060368715	2.42514659871825e-09	1.01124e-06	ENST00000184266+ENST00000485064+ENST00000492739+ENST00000461682+ENST00000491335+ENST00000496588	protein_coding	200.805
ENSG00000101182	PSMA7	240.90772167411	0.366267	0.0848814328069486	4.31504750602179	1.59568584591561e-05	0.000953251	ENST00000370873+ENST00000442551+ENST00000484488+ENST00000370861+ENST00000486193+ENST00000370858	protein_coding	200.153
ENSG00000159720	ATP6V0D1	559.093997851721	0.411806	0.072621780181344	5.67055432159297	1.4233622900516e-08	3.59458e-06	ENST00000568620+ENST00000290949+ENST00000563305+ENST00000565835+ENST00000602876+ENST00000426604+ENST00000540149+ENST00000567694+ENST00000561852+ENST00000563064+ENST00000564615+ENST00000567170+ENST00000566322+ENST00000564191+ENST00000564788+ENST00000568101+ENST00000561658+ENST00000568298	protein_coding	199.904
ENSG00000136003	ISCU	372.362694339588	0.378585	0.112864066539518	3.35434636830495	0.000795527149285124	0.0162927	ENST00000545932+ENST00000311893+ENST00000547005+ENST00000431221+ENST00000535729+ENST00000552072+ENST00000338291+ENST00000392807+ENST00000539580+ENST00000539593+ENST00000535405+ENST00000544493+ENST00000540154+ENST00000538193	protein_coding	198.022
ENSG00000107281	NPDC1	362.012920153325	-0.39693	0.0981184100833368	-4.04542065388471	5.22292540962056e-05	0.00234178	ENST00000371601+ENST00000371600+ENST00000496498+ENST00000472668+ENST00000488145+ENST00000485589	protein_coding	186.902
ENSG00000080822	CLDND1	239.064155773923	-0.474202	0.131606126866357	-3.60319268596038	0.000314332333868556	0.00863441	ENST00000502288+ENST00000507874+ENST00000341181+ENST00000437922+ENST00000394180+ENST00000394181+ENST00000394185+ENST00000503004+ENST00000506885+ENST00000513873+ENST00000510545+ENST00000511081+ENST00000513287+ENST00000506927+ENST00000511667+ENST00000513452+ENST00000502299+ENST00000508902+ENST00000512147+ENST00000510541+ENST00000514537+ENST00000507411+ENST00000515620+ENST00000507944+ENST00000508659…	protein_coding	186.155
ENSG00000087191	PSMC5	189.107128911045	0.381335	0.122109019510983	3.12290979336379	0.0017907262294882	0.0287412	ENST00000579708+ENST00000310144+ENST00000581842+ENST00000584320+ENST00000580864+ENST00000579147+ENST00000585123+ENST00000581764+ENST00000585242+ENST00000578570+ENST00000375812+ENST00000581882+ENST00000579031+ENST00000582130+ENST00000584536+ENST00000584880+ENST00000580063+ENST00000583283+ENST00000580265+ENST00000584657+ENST00000582420	protein_coding	185.801
ENSG00000134333	LDHA	520.869082664069	0.450147	0.106741766041181	4.2171629780419	2.47395173646095e-05	0.00133973	ENST00000422447+ENST00000543445+ENST00000469976+ENST00000396222+ENST00000430553+ENST00000545467+ENST00000545215+ENST00000541097+ENST00000536528+ENST00000543695+ENST00000539814+ENST00000494573+ENST00000535451+ENST00000227157+ENST00000478970+ENST00000495052+ENST00000540430+ENST00000379412+ENST00000542179+ENST00000486690+ENST00000537296+ENST00000460405+ENST00000375710+ENST00000538451	protein_coding	184.504
ENSG00000180817	PPA1	326.573938478354	0.309795	0.0765952798237149	4.04456594809941	5.24201515304552e-05	0.0023453	ENST00000373232+ENST00000610026+ENST00000373230+ENST00000608321+ENST00000460755+ENST00000495346	protein_coding	183.911
ENSG00000176978	DPP7	146.818306224611	-0.384393	0.108674979062963	-3.53708902349044	0.000404563275509399	0.0101576	ENST00000371579+ENST00000473532+ENST00000470766+ENST00000463619+ENST00000483783+ENST00000472306+ENST00000485456+ENST00000460830+ENST00000482088+ENST00000478597+ENST00000497375+ENST00000473703+ENST00000491807	protein_coding	182.975
ENSG00000126432	PRDX5	274.047137855731	0.655528	0.114960434151424	5.70220160152808	1.18269831413311e-08	3.0797e-06	ENST00000265462+ENST00000347941+ENST00000352435	protein_coding	178.165
ENSG00000177556	ATOX1	154.930499156087	0.385093	0.104255954407715	3.69372574210261	0.000220992146392036	0.00665819	ENST00000521264+ENST00000524142+ENST00000520382+ENST00000522314+ENST00000522145+ENST00000313115+ENST00000522710	protein_coding	178.07
ENSG00000118680	MYL12B	282.623404276655	0.359952	0.0974855209736631	3.69236741772607	0.000222176172090826	0.00667457	ENST00000237500+ENST00000581193+ENST00000400175+ENST00000584539	protein_coding	177.254
ENSG00000128463	EMC4	232.333367744687	0.347029	0.0842959609453166	4.11679235550803	3.84181907077911e-05	0.00188486	ENST00000267750+ENST00000249209+ENST00000560911+ENST00000557941+ENST00000561372+ENST00000559078+ENST00000558205+ENST00000557879+ENST00000558102+ENST00000559421+ENST00000558810+ENST00000561246+ENST00000560947	protein_coding	175.428
ENSG00000109390	NDUFC1	143.111905360863	0.447981	0.0998018379123958	4.48870853437117	7.16562579282656e-06	0.000513389	ENST00000503997+ENST00000539002+ENST00000544855+ENST00000539387+ENST00000394228+ENST00000265500+ENST00000505036+ENST00000394225+ENST00000503453+ENST00000394223+ENST00000513022+ENST00000507764	protein_coding	175.126
ENSG00000100138	NHP2L1	461.126722005052	0.291988	0.0675175295671422	4.32462579652227	1.52790996401327e-05	0.000920676	ENST00000355257+ENST00000215956+ENST00000401959+ENST00000463675+ENST00000402458+ENST00000488571+ENST00000469028+ENST00000469522	protein_coding	174.017
ENSG00000159352	PSMD4	178.089109023128	0.27663	0.0842213549044537	3.2845555514556	0.00102143359793037	0.0193599	ENST00000368884+ENST00000368881+ENST00000461434+ENST00000462970+ENST00000476855+ENST00000437736+ENST00000469786+ENST00000445776+ENST00000491857+ENST00000427779+ENST00000470396+ENST00000453615	protein_coding	173.419
ENSG00000125814	NAPB	1172.76691142079	0.235635	0.0566369291732587	4.16044909019932	3.17622414899178e-05	0.00162753	ENST00000377026+ENST00000398425+ENST00000432543+ENST00000472855+ENST00000468128+ENST00000487502	protein_coding	171.227
ENSG00000004779	NDUFAB1	190.405846693058	0.727701	0.124198029778281	5.85920267464953	4.6509479083331e-09	1.61613e-06	ENST00000007516+ENST00000562133+ENST00000484769+ENST00000570319+ENST00000567761	protein_coding	169.36
ENSG00000116288	PARK7	218.179614030964	0.526913	0.117590361532741	4.48092092756455	7.4321645110888e-06	0.000528851	ENST00000493373+ENST00000338639+ENST00000460192+ENST00000493678+ENST00000377493+ENST00000465354+ENST00000377491+ENST00000377488+ENST00000497113+ENST00000469225	protein_coding	166.147
ENSG00000120265	PCMT1	531.358433649077	0.446294	0.0873517557168944	5.10915764051781	3.23598280343823e-07	4.52799e-05	ENST00000367384+ENST00000464889+ENST00000367378+ENST00000484601+ENST00000367380+ENST00000494411+ENST00000460828+ENST00000544496+ENST00000486585+ENST00000495487+ENST00000480010	protein_coding	163.046
ENSG00000135390	ATP5G2	196.742879814373	0.256716	0.0890396508731503	2.88315988182741	0.00393707556510827	0.0493887	ENST00000550241+ENST00000394349+ENST00000602871+ENST00000552242+ENST00000495596+ENST00000549164+ENST00000338662+ENST00000549748+ENST00000552120	protein_coding	161.699
ENSG00000136810	TXN	156.107810783694	0.308834	0.100864148208505	3.06188463133038	0.00219948207733238	0.032755	ENST00000374517+ENST00000374515+ENST00000487892	protein_coding	159.205
ENSG00000140990	NDUFB10	202.970322550218	0.544829	0.101850774954758	5.3492822117419	8.83037531569747e-08	1.5342e-05	ENST00000268668+ENST00000543683+ENST00000565031+ENST00000569148+ENST00000570172	protein_coding	159.189
ENSG00000183978	COA3	241.451492982444	0.479859	0.0980002198741649	4.89651023354717	9.75535701884355e-07	0.000107613	ENST00000586680+ENST00000328434	protein_coding	159.164
ENSG00000110107	PRPF19	173.006290762196	-0.341137	0.086704553449489	-3.93447353940836	8.33792533955691e-05	0.00322518	ENST00000227524+ENST00000540473+ENST00000535326+ENST00000539960+ENST00000539180+ENST00000541371+ENST00000546152	protein_coding	158.921
ENSG00000167815	PRDX2	289.744445235668	1.34292	0.150130530382929	8.94498790834785	3.71990476542414e-19	2.58521e-15	ENST00000301522+ENST00000334482+ENST00000466174+ENST00000498785+ENST00000478908+ENST00000477555+ENST00000435703	protein_coding	157.356
ENSG00000165629	ATP5C1	151.83646530183	0.592178	0.128583991567703	4.60538082063333	4.11711724315193e-06	0.000330145	ENST00000356708+ENST00000493053+ENST00000462760+ENST00000460362+ENST00000541227+ENST00000335698+ENST00000465936+ENST00000460820+ENST00000472202+ENST00000473809+ENST00000480528	protein_coding	154.983
ENSG00000174748	RPL15	420.148457953393	0.336809	0.0840113460453222	4.00908690884861	6.09539818633644e-05	0.00260951	ENST00000307839+ENST00000422218+ENST00000434031+ENST00000413699+ENST00000456530+ENST00000412097+ENST00000435882+ENST00000465786+ENST00000490223+ENST00000415719+ENST00000354811+ENST00000436146	protein_coding	152.946
ENSG00000111640	GAPDH	291.612186641184	1.14547	0.176238078866554	6.49954242634975	8.05646790896646e-11	6.17893e-08	ENST00000229239+ENST00000496049+ENST00000396856+ENST00000492719+ENST00000396861+ENST00000474249+ENST00000396859+ENST00000466588+ENST00000466525+ENST00000396858	protein_coding	152.312
ENSG00000166562	SEC11C	131.639496520737	0.460181	0.1163464707495	3.9552668313903	7.64492778407425e-05	0.00301481	ENST00000587834+ENST00000509791+ENST00000299714+ENST00000585864+ENST00000593132+ENST00000592774+ENST00000588875+ENST00000591406	protein_coding	147.878
ENSG00000123560	PLP1	706.005894068947	-0.652866	0.206727895988419	-3.15809371570766	0.00158804497245689	0.0263398	ENST00000434483+ENST00000429977+ENST00000455268+ENST00000422393+ENST00000433491+ENST00000418604+ENST00000443502+ENST00000361621+ENST00000303958+ENST00000465975+ENST00000494475+ENST00000464776+ENST00000480325+ENST00000485931+ENST00000495678+ENST00000479569+ENST00000485688+ENST00000478642+ENST00000461231+ENST00000476160+ENST00000466486+ENST00000494119+ENST00000496836	protein_coding	146.428
ENSG00000224550	RP11-270C12.3	63.4309362976233	0.714213	0.170997592508964	4.17674477758351	2.9571050076431e-05	0.00153365	ENST00000416095	pseduogene	145.494
ENSG00000092964	DPYSL2	1178.09597442066	0.246165	0.0613445311039485	4.01282244748382	5.99970412986678e-05	0.00257913	ENST00000521913+ENST00000493789+ENST00000311151+ENST00000523027+ENST00000523690+ENST00000523093+ENST00000521983+ENST00000474808	protein_coding	145.229
ENSG00000154153	FAM134B	336.286268479482	0.24184	0.0834674667880498	2.89741634171836	0.00376250070520924	0.0478319	ENST00000510362+ENST00000399793+ENST00000306320+ENST00000509977+ENST00000506441+ENST00000509048	protein_coding	143.125
ENSG00000104763	ASAH1	409.06636440868	0.27796	0.069186157963666	4.01757367725947	5.88004536326922e-05	0.00255402	ENST00000262097+ENST00000381733+ENST00000417108+ENST00000520781+ENST00000314146+ENST00000519468+ENST00000521542+ENST00000518746+ENST00000523593+ENST00000519545+ENST00000517409+ENST00000523744+ENST00000518087+ENST00000520051	protein_coding	142.848
ENSG00000110958	PTGES3	374.486427024147	0.245398	0.0764886195393542	3.20829776877036	0.00133523176203519	0.0233738	ENST00000262033+ENST00000537473+ENST00000414274+ENST00000436399+ENST00000448157+ENST00000456859	protein_coding	142.791
ENSG00000213585	VDAC1	264.999457901474	0.272215	0.0937024186817975	2.90510618579127	0.00367128525907956	0.047023	ENST00000265333+ENST00000395044+ENST00000395047+ENST00000492324+ENST00000489906+ENST00000425992+ENST00000466080	protein_coding	142.741
ENSG00000180879	SSR4	134.575538461135	0.589832	0.130949522364371	4.50426725564494	6.66023464474839e-06	0.000490669	ENST00000320857+ENST00000491833+ENST00000370087+ENST00000482902+ENST00000370086+ENST00000460616+ENST00000370085+ENST00000471724+ENST00000471880+ENST00000486204+ENST00000485612+ENST00000447375	protein_coding	142.408
ENSG00000266964	FXYD1	1.35779552877393	-0.940318	0.245597764689313	-3.82869138284007	0.000128826431173558	0.00444686	ENST00000351325+ENST00000455515+ENST00000588715+ENST00000588607+ENST00000588081+ENST00000589121+ENST00000590462+ENST00000587056+ENST00000592818+ENST00000589209	protein_coding	141.03
ENSG00000137100	DCTN3	165.120791967269	0.537489	0.118248498823117	4.54542270396782	5.48251145620644e-06	0.000424925	ENST00000259632+ENST00000341694+ENST00000421919+ENST00000479399+ENST00000472418+ENST00000447983+ENST00000378916+ENST00000477738+ENST00000481438+ENST00000472074+ENST00000378913+ENST00000378911	protein_coding	138.801
ENSG00000177432	NAP1L5	569.810390249241	0.258083	0.0812922299072306	3.17475945833584	0.00149960756963296	0.0254811	ENST00000323061	protein_coding	138.678
ENSG00000108294	PSMB3	136.953090921865	0.417932	0.105303739609444	3.96882513668096	7.22278576618813e-05	0.00291837	ENST00000225426+ENST00000579088+ENST00000584662+ENST00000579729+ENST00000581388+ENST00000583873	protein_coding	138.442
ENSG00000130294	KIF1A	1278.05663158185	-0.368569	0.0730905787245895	-5.04263560159871	4.59163147453914e-07	5.83725e-05	ENST00000320389+ENST00000460788+ENST00000498729+ENST00000492812+ENST00000488776+ENST00000465813+ENST00000431776+ENST00000404283+ENST00000494452+ENST00000415042+ENST00000463388+ENST00000428768+ENST00000448728	protein_coding	138.235
ENSG00000165672	PRDX3	395.938689328719	0.344377	0.108317898371455	3.17931375297112	0.00147624204447605	0.0252973	ENST00000356951+ENST00000298510+ENST00000494433+ENST00000463322	protein_coding	137.691
ENSG00000104979	C19orf53	119.324002753904	0.309035	0.100886074778562	3.06321198651934	0.00218974878846793	0.0326801	ENST00000588234+ENST00000221576+ENST00000588858+ENST00000588841+ENST00000592760+ENST00000593274	protein_coding	136.656
ENSG00000125868	DSTN	808.477350204979	0.488147	0.0809946520534417	6.02690069551891	1.67133621496372e-09	7.11137e-07	ENST00000246069+ENST00000474024+ENST00000449141	protein_coding	134.873
ENSG00000100285	NEFH	883.190252283553	0.424344	0.0784822611236706	5.40688038876415	6.41319402621933e-08	1.19383e-05	ENST00000310624	protein_coding	134.556
ENSG00000068615	REEP1	947.010539127147	0.300544	0.0715680374317579	4.19941654460847	2.67603636728603e-05	0.00141966	ENST00000165698+ENST00000535845+ENST00000538924+ENST00000541910+ENST00000540790+ENST00000437769+ENST00000453231+ENST00000490915+ENST00000428491+ENST00000473407+ENST00000489855+ENST00000475475	protein_coding	133.883
ENSG00000119013	NDUFB3	126.704636486249	0.494499	0.129958786460789	3.80504821962764	0.000141776568352202	0.00478301	ENST00000450023+ENST00000237889+ENST00000433898+ENST00000454214	protein_coding	131.764
ENSG00000184752	NDUFA12	114.695195299417	0.532278	0.151202733458718	3.52029365387975	0.000431069258114919	0.0106	ENST00000552205+ENST00000547447+ENST00000327772+ENST00000551991+ENST00000547986+ENST00000546788+ENST00000547157+ENST00000550187+ENST00000538372	protein_coding	131.347
ENSG00000164054	SHISA5	168.568423350229	-0.299022	0.0952759459143018	-3.13848143413131	0.00169825693004232	0.027597	ENST00000296444+ENST00000444115+ENST00000465449+ENST00000426002+ENST00000494854+ENST00000466424+ENST00000442747+ENST00000417962+ENST00000443308+ENST00000460758+ENST00000497863+ENST00000486344+ENST00000424965+ENST00000417841+ENST00000415268+ENST00000441507+ENST00000490864+ENST00000496408	protein_coding	130.169
ENSG00000109971	HSPA8	395.562546092469	0.673913	0.142468733899899	4.73025476374838	2.24238256612633e-06	0.000207784	ENST00000453788+ENST00000534624+ENST00000533540+ENST00000532636+ENST00000532091+ENST00000227378+ENST00000534319+ENST00000526110+ENST00000524552+ENST00000526686+ENST00000533238+ENST00000526862+ENST00000527983+ENST00000528292+ENST00000532780+ENST00000525463+ENST00000532167+ENST00000525624+ENST00000534567+ENST00000527387+ENST00000532182+ENST00000524590+ENST00000530391+ENST00000531063	protein_coding	130.093
ENSG00000065559	MAP2K4	502.556483749655	0.309206	0.0931433910103109	3.31967361290834	0.000901227472047004	0.0177429	ENST00000353533+ENST00000582183+ENST00000415385+ENST00000602305+ENST00000602375+ENST00000602811+ENST00000602537+ENST00000602686+ENST00000538465+ENST00000582897+ENST00000581941+ENST00000579089+ENST00000582377+ENST00000585076+ENST00000536413	protein_coding	127.239
ENSG00000165023	DIRAS2	168.210917648436	0.307277	0.10207662956283	3.01026214402628	0.00261022300619984	0.0369956	ENST00000375765	protein_coding	127.186
ENSG00000178741	COX5A	182.563287391235	0.82002	0.125991565433483	6.50852860668208	7.58904589839718e-11	6.08554e-08	ENST00000322347+ENST00000567270+ENST00000562233+ENST00000568783+ENST00000568517+ENST00000564811	protein_coding	126.886
ENSG00000167863	ATP5H	135.831827140547	0.464304	0.138380091935394	3.35528251582355	0.000792839701079697	0.0162856	ENST00000344546+ENST00000301587+ENST00000580649+ENST00000538432+ENST00000582341	protein_coding	126.858
ENSG00000171314	PGAM1	57.5763227830699	0.777894	0.147412866366955	5.27697298264315	1.3133524050695e-07	2.12264e-05	ENST00000334828+ENST00000473929+ENST00000467867	protein_coding	126.294
ENSG00000144746	ARL6IP5	375.508937512629	0.365226	0.077339010069245	4.72239749235789	2.33080574630702e-06	0.000211282	ENST00000273258+ENST00000484921+ENST00000478935+ENST00000470936+ENST00000485444	protein_coding	125.694
ENSG00000167978	SRRM2	145.140090212496	-0.625967	0.123087048927141	-5.0855594942725	3.66543905401776e-07	4.80634e-05	ENST00000301740+ENST00000576924+ENST00000575009+ENST00000576894+ENST00000575701+ENST00000576415+ENST00000571378+ENST00000574340+ENST00000570971+ENST00000575870+ENST00000573451+ENST00000571372+ENST00000570655+ENST00000573498+ENST00000572278+ENST00000576076+ENST00000572952+ENST00000576674+ENST00000574593+ENST00000572883+ENST00000572721+ENST00000573311+ENST00000571041+ENST00000570705+ENST00000576878…	protein_coding	123.97
ENSG00000178449	COX14	105.370634992007	0.445247	0.133901880634063	3.32517568121712	0.000883628369686724	0.0175455	ENST00000550487+ENST00000317943+ENST00000550654+ENST00000548985	protein_coding	123.294
ENSG00000111275	ALDH2	311.920612013565	0.326225	0.0787390188033288	4.1431143290868	3.42621029925148e-05	0.00171302	ENST00000416293+ENST00000261733+ENST00000548536+ENST00000549106	protein_coding	122.849
ENSG00000165637	VDAC2	135.141325640012	0.24837	0.0860631051861622	2.88590568890072	0.003902890919698	0.0491053	ENST00000543351+ENST00000298468+ENST00000344036+ENST00000332211+ENST00000472137+ENST00000470745+ENST00000475142+ENST00000481876+ENST00000535553+ENST00000313132+ENST00000498394+ENST00000468285+ENST00000447677+ENST00000413289+ENST00000460044	protein_coding	122.591
ENSG00000142507	PSMB6	167.730933437017	0.670183	0.126680903075679	5.2903260874754	1.22098473836803e-07	2.00443e-05	ENST00000270586+ENST00000575079+ENST00000571309+ENST00000575643	protein_coding	122.171
ENSG00000130414	NDUFA10	303.615032569353	0.269921	0.087609442942877	3.08095817185464	0.00206335632486204	0.0314254	ENST00000419408+ENST00000252711+ENST00000476216+ENST00000404554+ENST00000485344+ENST00000443626+ENST00000444548+ENST00000448880+ENST00000307300+ENST00000471378+ENST00000414580+ENST00000407129+ENST00000497536	protein_coding	120.988
ENSG00000185946	RNPC3	161.809660292447	-0.48692	0.151436450986776	-3.21534253629674	0.00130288952609434	0.0229341	ENST00000524631+ENST00000531883+ENST00000533099+ENST00000527062+ENST00000423855+ENST00000533834+ENST00000524641+ENST00000525323+ENST00000532117	protein_coding	120.928
ENSG00000130540	SULT4A1	474.627557223315	0.167176	0.0571156693516923	2.92696913773586	0.00342282844485548	0.0447006	ENST00000330884+ENST00000422525+ENST00000432404+ENST00000540422+ENST00000249130+ENST00000475131	protein_coding	119.629
ENSG00000162910	MRPL55	136.160178234993	0.442469	0.116174302738953	3.80866384351396	0.000139719752104814	0.00473661	ENST00000336300+ENST00000336520+ENST00000295008+ENST00000465397+ENST00000366746+ENST00000366747+ENST00000348259+ENST00000366744+ENST00000366742+ENST00000366739+ENST00000366740+ENST00000366741+ENST00000366738+ENST00000366736+ENST00000366735+ENST00000366734+ENST00000366733+ENST00000366732+ENST00000459783+ENST00000465268+ENST00000391867+ENST00000430433+ENST00000411464+ENST00000366731+ENST00000457264…	protein_coding	119.346
ENSG00000162706	CADM3	435.149386272973	-0.37066	0.10303349826889	-3.59747232333687	0.000321324674561989	0.00873442	ENST00000368125+ENST00000368124+ENST00000416746+ENST00000497636	protein_coding	119.164
ENSG00000196683	TOMM7	116.897669881737	0.393461	0.118425401062254	3.32244103766031	0.000892335281336935	0.0176261	ENST00000358435+ENST00000463284+ENST00000405021+ENST00000483581+ENST00000372879+ENST00000496129	protein_coding	119.005
ENSG00000121769	FABP3	184.083769819498	0.815913	0.10895488437903	7.48854422581876	6.96417211897554e-14	1.61329e-10	ENST00000373713+ENST00000497275+ENST00000498148+ENST00000482018	protein_coding	118.964
ENSG00000197971	MBP	267.525876898461	-0.442174	0.132256029708884	-3.34331799389722	0.000827829779093683	0.016822	ENST00000382582+ENST00000355994+ENST00000490319+ENST00000585201+ENST00000397866+ENST00000397875+ENST00000397865+ENST00000527041+ENST00000359645+ENST00000528160+ENST00000577755+ENST00000527975+ENST00000578715+ENST00000397869+ENST00000354542+ENST00000531144+ENST00000583474+ENST00000533278+ENST00000526111+ENST00000579129+ENST00000580402+ENST00000578193+ENST00000397868+ENST00000447114+ENST00000580473…	protein_coding	118.195
ENSG00000180389	ATP5EP2	66.384179581338	0.318323	0.107616866810889	2.95792906473383	0.00309713386415767	0.0419845	ENST00000381026	protein_coding	116.487
ENSG00000127824	TUBA4A	283.019665097403	0.458218	0.128647269119013	3.56181450009735	0.000368300577915096	0.00949059	ENST00000392088+ENST00000248437+ENST00000498660+ENST00000398989+ENST00000427737+ENST00000456818+ENST00000462806+ENST00000447205+ENST00000475683+ENST00000425551	protein_coding	115.387
ENSG00000100554	ATP6V1D	225.616428559156	0.553921	0.122272874004099	4.53020364290652	5.89268597855196e-06	0.000448382	ENST00000554087+ENST00000553974+ENST00000553408+ENST00000555625+ENST00000216442+ENST00000555474+ENST00000555431+ENST00000554236+ENST00000555723+ENST00000556058+ENST00000555335+ENST00000553687+ENST00000555012+ENST00000557244	protein_coding	115.317
ENSG00000175701	LINC00116	100.203788550254	0.50891	0.120413181522757	4.22636279743819	2.37498969549565e-05	0.00130306	ENST00000414416+ENST00000426713	lincRNA	114.478
ENSG00000142192	APP	546.1749710592	-0.174983	0.0582948931816031	-3.00168055212044	0.00268493765274358	0.0377894	ENST00000357903+ENST00000348990+ENST00000354192+ENST00000346798+ENST00000359726+ENST00000358918+ENST00000448388+ENST00000440126+ENST00000439274+ENST00000464867+ENST00000456209+ENST00000448850+ENST00000415997+ENST00000491395+ENST00000474136+ENST00000463070+ENST00000548570+ENST00000462267+ENST00000466453	protein_coding	113.873
ENSG00000182117	NOP10	111.960259897958	0.523318	0.137633692207325	3.80225542498116	0.00014338478753702	0.00481949	ENST00000328848+ENST00000557912	protein_coding	113.829
ENSG00000083845	RPS5	143.216224210986	0.328075	0.09886732739437	3.31833621450199	0.000905554124351802	0.0178112	ENST00000601521+ENST00000596314+ENST00000598098+ENST00000196551+ENST00000598495+ENST00000599909+ENST00000598807+ENST00000596046+ENST00000599232	protein_coding	112.767
ENSG00000088367	EPB41L1	740.849061211122	-0.225326	0.0637028661022603	-3.53714181977366	0.000404482408012909	0.0101576	ENST00000202028+ENST00000432589+ENST00000373950+ENST00000447825+ENST00000441639+ENST00000406771+ENST00000430276+ENST00000452261+ENST00000373946+ENST00000373945+ENST00000338074+ENST00000373941+ENST00000451082+ENST00000454226+ENST00000479336+ENST00000432603+ENST00000427533	protein_coding	112.715
ENSG00000226976	COX6A1P2	64.2462640552586	0.65609	0.12183110479886	5.38524179462559	7.2347324508984e-08	1.32313e-05	ENST00000423336	protein_coding	111.93
ENSG00000149295	DRD2	428.456982162136	-0.481936	0.0902953075884447	-5.33732843031599	9.43260879413858e-08	1.62529e-05	ENST00000355319+ENST00000362072+ENST00000346454+ENST00000544518+ENST00000542968+ENST00000538967+ENST00000540600+ENST00000535984+ENST00000539420+ENST00000543292+ENST00000542616	protein_coding	111.787
ENSG00000165264	NDUFB6	128.950548943217	0.435872	0.14792992454169	2.94647898778234	0.00321414255553663	0.0429595	ENST00000379847+ENST00000350021	protein_coding	111.782
ENSG00000189043	NDUFA4	470.615515564791	0.549395	0.116447322847725	4.71796829286121	2.3821160814759e-06	0.000213598	ENST00000339600+ENST00000482299+ENST00000470761+ENST00000486007+ENST00000463308+ENST00000492822	protein_coding	111.73
ENSG00000258199	RP11-977G19.5	71.9091389281089	-0.364853	0.101556712039676	-3.59260320281324	0.000327390925503048	0.00883024	ENST00000553176	sense_overlapping	110.301
ENSG00000136930	PSMB7	187.426281527356	0.407786	0.122258587924638	3.33543547738134	0.000851659150768849	0.0171392	ENST00000259457+ENST00000498485+ENST00000536392+ENST00000474081+ENST00000478817+ENST00000441097+ENST00000466951	protein_coding	110.251
ENSG00000165943	MOAP1	470.587336677976	0.306054	0.0836097751944476	3.66050293110141	0.000251720674246865	0.00739172	ENST00000298894+ENST00000556883	protein_coding	109.808
ENSG00000118816	CCNI	443.321250924403	0.291243	0.070789585081974	4.11420934280219	3.88508741798589e-05	0.00189205	ENST00000237654+ENST00000515468+ENST00000537948+ENST00000506614+ENST00000511943+ENST00000505609+ENST00000504697+ENST00000513774+ENST00000507788+ENST00000515790	protein_coding	108.476
ENSG00000160221	C21orf33	246.097098530857	0.341162	0.0845704561900269	4.03405947105325	5.48214334202566e-05	0.00243186	ENST00000291577+ENST00000495007+ENST00000427803+ENST00000493883+ENST00000480786+ENST00000348499+ENST00000389690+ENST00000449622+ENST00000488392+ENST00000419699+ENST00000470545	protein_coding	108.448
ENSG00000105518	TMEM205	102.941958934263	0.466235	0.0972259899141702	4.79537590937762	1.62370057438462e-06	0.000158189	ENST00000447337+ENST00000593256+ENST00000586218+ENST00000586956+ENST00000586590+ENST00000585722+ENST00000354882+ENST00000587948+ENST00000589555+ENST00000588560+ENST00000588321+ENST00000586701+ENST00000592952+ENST00000590482+ENST00000591677+ENST00000590788	protein_coding	107.681
ENSG00000169180	XPO6	170.996534136942	-0.355971	0.101923619531563	-3.49252915298986	0.000478469364145563	0.0114007	ENST00000565698+ENST00000304658+ENST00000568065+ENST00000569315+ENST00000567038+ENST00000570007+ENST00000573275+ENST00000569216+ENST00000564905+ENST00000562408+ENST00000563138+ENST00000565284+ENST00000567842+ENST00000564337+ENST00000570294+ENST00000566175+ENST00000574435+ENST00000561488+ENST00000569973+ENST00000573645+ENST00000570033+ENST00000569951+ENST00000566073	protein_coding	105.769
ENSG00000179218	CALR	62.177005115125	0.474205	0.105048635576305	4.51414431515006	6.35729177831811e-06	0.000476774	ENST00000587486+ENST00000316448+ENST00000590325+ENST00000588454+ENST00000586760+ENST00000586803+ENST00000586967	protein_coding	105.26
ENSG00000168701	TMEM208	112.319340112108	0.420819	0.135833638528581	3.09805021192664	0.00194798420575866	0.0304614	ENST00000567193+ENST00000304800+ENST00000563168+ENST00000566486+ENST00000563953+ENST00000561586+ENST00000562235+ENST00000565201+ENST00000564087+ENST00000563426+ENST00000563271+ENST00000564649	protein_coding	105.015
ENSG00000145337	PYURF	10.1471649654399	-0.337737	0.102982161405655	-3.27956478472773	0.00103967336373997	0.0195987	ENST00000273968	protein_coding	104.617
ENSG00000132507	EIF5A	124.526505539693	0.500012	0.0808917999553246	6.18124461423048	6.35981807037628e-10	3.08362e-07	ENST00000336452+ENST00000355068+ENST00000336458+ENST00000576930+ENST00000572815+ENST00000573542+ENST00000575001+ENST00000571955+ENST00000419711+ENST00000573714+ENST00000416016	protein_coding	104.254
ENSG00000132341	RAN	210.708522993488	0.520947	0.108956771080425	4.78122709948197	1.74228402849236e-06	0.000168171	ENST00000543796+ENST00000448750+ENST00000536606+ENST00000541630+ENST00000537745+ENST00000392369+ENST00000477395+ENST00000254675+ENST00000535090+ENST00000541679+ENST00000392367+ENST00000464211+ENST00000539498	protein_coding	102.567
ENSG00000168743	NPNT	267.440100647713	0.3896	0.132066724794015	2.95002481905606	0.00317748403308783	0.0426577	ENST00000504304+ENST00000379987+ENST00000453617+ENST00000514622+ENST00000427316+ENST00000305572+ENST00000506666+ENST00000503451+ENST00000514837+ENST00000513430+ENST00000506056+ENST00000511518+ENST00000505821+ENST00000514632+ENST00000504787+ENST00000505917	protein_coding	102.355
ENSG00000131174	COX7B	333.248296522213	0.723354	0.1246452376527	5.80330187074495	6.50215750050713e-09	1.98528e-06	ENST00000481445+ENST00000373335+ENST00000475465	protein_coding	102.136
ENSG00000129625	REEP5	549.900611295256	0.495088	0.0777324398050998	6.36912821950745	1.90105636812172e-10	1.33342e-07	ENST00000379638+ENST00000513339+ENST00000497856+ENST00000545426+ENST00000511865+ENST00000261482+ENST00000504247+ENST00000474542	protein_coding	101.73
ENSG00000101210	EEF1A2	262.106279353648	-0.374764	0.113700329195691	-3.29606827364264	0.00098048184354432	0.0188059	ENST00000217182+ENST00000298049	protein_coding	101.512
ENSG00000185825	BCAP31	232.362916712143	0.314078	0.0888320909190062	3.53563558740845	0.000406795427696064	0.0101694	ENST00000441714+ENST00000345046+ENST00000458587+ENST00000442093+ENST00000429550+ENST00000416815+ENST00000423827+ENST00000430088+ENST00000468947	protein_coding	101.004
ENSG00000132963	POMP	261.586208634621	0.414055	0.0987760799204653	4.19185921328078	2.76677680940017e-05	0.00144573	ENST00000460403+ENST00000380842	protein_coding	100.993
ENSG00000123240	OPTN	645.003477911088	0.506447	0.0861117498896715	5.8812731216154	4.07122719662077e-09	1.43866e-06	ENST00000263036+ENST00000378764+ENST00000378748+ENST00000378752+ENST00000378747+ENST00000487935+ENST00000482140+ENST00000378757+ENST00000430081+ENST00000486862+ENST00000424614+ENST00000469025	protein_coding	100.478
ENSG00000120645	IQSEC3	96.9434219783142	-0.453028	0.114889301670277	-3.94316623562753	8.0412875252259e-05	0.00313957	ENST00000538872+ENST00000326261+ENST00000382841+ENST00000540907+ENST00000537151+ENST00000544511	protein_coding	99.9871
ENSG00000112096	SOD2	326.418216998832	0.363631	0.103704109835664	3.50643215029989	0.000454157206597722	0.0110616	ENST00000538183+ENST00000546260+ENST00000367055+ENST00000367054+ENST00000546087+ENST00000444946+ENST00000337404+ENST00000535459+ENST00000541573+ENST00000540491+ENST00000545162+ENST00000535561+ENST00000537657+ENST00000401980+ENST00000452684+ENST00000535372	protein_coding	99.9205
ENSG00000112146	FBXO9	137.669417077819	-0.267677	0.0860838771322015	-3.10948983738952	0.00187410731539322	0.0296047	ENST00000459845+ENST00000498744+ENST00000461222+ENST00000370939+ENST00000323557+ENST00000473337+ENST00000244426+ENST00000468481+ENST00000480463+ENST00000484812+ENST00000474457+ENST00000484436+ENST00000473318	protein_coding	99.2883
ENSG00000136193	SCRN1	942.361904558534	0.313846	0.0665659370478805	4.71482001310519	2.41924504192686e-06	0.000215551	ENST00000242059+ENST00000426154+ENST00000425819+ENST00000409497+ENST00000416113+ENST00000434476+ENST00000421434+ENST00000494620+ENST00000438497+ENST00000409570	protein_coding	99.1856
ENSG00000184983	NDUFA6	145.700058846914	0.493601	0.11054799770198	4.46503585269165	8.00553448181596e-06	0.000560092	ENST00000498737+ENST00000602404+ENST00000470753	protein_coding	98.4016
ENSG00000100664	EIF5	392.623213592067	0.249064	0.072372263971177	3.44142662993403	0.000578655377164012	0.0129725	ENST00000560877+ENST00000216554+ENST00000559249+ENST00000560763+ENST00000558316+ENST00000560200+ENST00000558265+ENST00000560338+ENST00000561325+ENST00000392715+ENST00000559130+ENST00000559532+ENST00000558506+ENST00000558551+ENST00000561439+ENST00000561023+ENST00000559923+ENST00000559011+ENST00000561380+ENST00000558800+ENST00000561406	protein_coding	97.9531
ENSG00000128272	ATF4	177.812202524404	0.560707	0.0910764082218804	6.15644736714017	7.43948833002317e-10	3.4468e-07	ENST00000404241+ENST00000396680+ENST00000337304	protein_coding	97.6176
ENSG00000122873	CISD1	364.064191681442	0.203733	0.0650435619727115	3.13225389894154	0.00173469789717315	0.028018	ENST00000333926+ENST00000464703+ENST00000489785+ENST00000488388	protein_coding	97.4608
ENSG00000183426	NPIPA1	9.41939483324891	-0.676305	0.205172708847224	-3.29627359548687	0.000979765491843531	0.0188059	ENST00000472413+ENST00000541836+ENST00000545831+ENST00000328085+ENST00000424549+ENST00000545479+ENST00000534720+ENST00000537062	protein_coding	96.3616
ENSG00000084764	MAPRE3	216.841166953001	-0.771222	0.159228126712678	-4.84350597655312	1.2756788228605e-06	0.000130376	ENST00000233121+ENST00000494788+ENST00000405074+ENST00000475633+ENST00000481222+ENST00000491354+ENST00000474367+ENST00000458529+ENST00000402218	protein_coding	95.1566
ENSG00000141741	MIEN1	111.284912717516	0.43106	0.124102874598576	3.47340591179803	0.000513897507771165	0.0119712	ENST00000582963+ENST00000394231+ENST00000474210+ENST00000469568+ENST00000577810+ENST00000498164	protein_coding	93.668
ENSG00000168772	CXXC4	189.839030303411	-0.296811	0.0801079788529111	-3.70513881298173	0.000211274995523174	0.00646824	ENST00000394767+ENST00000466963+ENST00000515509+ENST00000426831	protein_coding	92.8354
ENSG00000006128	TAC1	111.257926996159	-1.20108	0.216436736207353	-5.54931646239909	2.86788645543847e-08	6.42931e-06	ENST00000319273+ENST00000346867+ENST00000350485+ENST00000495916+ENST00000491437	protein_coding	92.139
ENSG00000129562	DAD1	86.0469617594376	0.369935	0.123861579484862	2.98668232741849	0.00282022610379401	0.039095	ENST00000250498+ENST00000535847+ENST00000489532+ENST00000538631+ENST00000543337	protein_coding	92.1032
ENSG00000114573	ATP6V1A	604.20344096721	0.277251	0.0905194657739682	3.06288639146939	0.0021921326649781	0.0326923	ENST00000273398+ENST00000462855+ENST00000538620+ENST00000470455+ENST00000475322+ENST00000496747+ENST00000461496	protein_coding	92.0067
ENSG00000165169	DYNLT3	345.558547015008	0.27231	0.0838951705314306	3.24583990840968	0.00117104672836936	0.021398	ENST00000378581+ENST00000378578+ENST00000432389	protein_coding	91.8795
ENSG00000179262	RAD23A	154.541308669963	-0.296867	0.090377765643788	-3.28473423467642	0.00102078608910424	0.0193599	ENST00000541222+ENST00000591499+ENST00000588329+ENST00000316856+ENST00000586534+ENST00000592268+ENST00000593114+ENST00000588826+ENST00000586375+ENST00000590881+ENST00000591467	protein_coding	91.8248
ENSG00000075785	RAB7A	370.001620897714	0.349904	0.0772031415832262	4.53225568895153	5.83571517855964e-06	0.000445673	ENST00000265062+ENST00000482525+ENST00000491681+ENST00000464496+ENST00000485280+ENST00000483906+ENST00000493186+ENST00000490093	protein_coding	91.0761
ENSG00000179091	CYC1	222.148522135787	0.379721	0.113795076553079	3.33688021737413	0.00084724454036852	0.0170999	ENST00000318911+ENST00000533444+ENST00000528618+ENST00000525122	protein_coding	90.2882
ENSG00000119185	ITGB1BP1	148.408195844122	0.540907	0.101554644389114	5.32626580182021	1.00252396077002e-07	1.69932e-05	ENST00000360635+ENST00000355346+ENST00000238091+ENST00000483795+ENST00000490426+ENST00000497031+ENST00000464228+ENST00000359712+ENST00000465527+ENST00000460720+ENST00000488451+ENST00000470507+ENST00000456913+ENST00000482798+ENST00000492079+ENST00000463190+ENST00000494563+ENST00000467606+ENST00000484735+ENST00000460001+ENST00000497105	protein_coding	90.2301
ENSG00000119421	NDUFA8	147.629272150024	0.52367	0.0960526446320642	5.45191096034566	4.98314065594325e-08	9.76032e-06	ENST00000537618+ENST00000373768	protein_coding	89.9338
ENSG00000205629	LCMT1	84.8597572939552	0.490935	0.112171736350318	4.37663541895686	1.20525321690688e-05	0.000770807	ENST00000399069+ENST00000380962+ENST00000564011+ENST00000380966+ENST00000577157+ENST00000570981+ENST00000576382+ENST00000576625+ENST00000573435+ENST00000572869+ENST00000572761+ENST00000575396+ENST00000574450	protein_coding	89.7208
ENSG00000108518	PFN1	159.607772590324	0.288171	0.0830866466013636	3.46831471493697	0.000523733547290875	0.0120674	ENST00000225655+ENST00000574872+ENST00000572383	protein_coding	89.4763
ENSG00000101365	IDH3B	153.666580085748	0.437735	0.11933113458664	3.66823690378599	0.000244228836598788	0.00723639	ENST00000380843+ENST00000380851+ENST00000474315+ENST00000488299+ENST00000492240+ENST00000466494+ENST00000477689+ENST00000466999+ENST00000479376+ENST00000462967+ENST00000491065	protein_coding	89.4275
ENSG00000237949	LINC00844	69.1475996399685	-0.706912	0.229144035401857	-3.08501290796221	0.00203543319312174	0.0311806	ENST00000432535	lincRNA	88.8826
ENSG00000218283	MORF4L1P1	45.6328518256252	0.393775	0.105585803618297	3.72943464859091	0.000191909869763523	0.00605134	ENST00000404582	pseduogene	88.5772
ENSG00000151729	SLC25A4	428.988742512602	0.303077	0.0777716391662122	3.89701277158648	9.73864852825499e-05	0.00356838	ENST00000281456+ENST00000491736	protein_coding	88.3432
ENSG00000126777	KTN1	115.62377365438	-0.345613	0.103351386099342	-3.34406219639839	0.000825612257145457	0.0167934	ENST00000557267+ENST00000395309+ENST00000413890+ENST00000555498+ENST00000438792+ENST00000395314+ENST00000459737+ENST00000395308+ENST00000395311+ENST00000416613+ENST00000554567+ENST00000553360+ENST00000554507+ENST00000554890+ENST00000555164+ENST00000554306+ENST00000554570+ENST00000553624+ENST00000555573+ENST00000555172+ENST00000334975+ENST00000556631+ENST00000555506+ENST00000554294+ENST00000554831…	protein_coding	88.2955
ENSG00000163382	APOA1BP	154.687939347375	0.327217	0.0836680406837871	3.91089871611608	9.19533288812842e-05	0.00342958	ENST00000368235+ENST00000368234+ENST00000368233+ENST00000467374+ENST00000488840	protein_coding	87.243
ENSG00000198618	PPIAP22	12.8434903579495	1.10702	0.205960716977301	5.37490778277755	7.66218870113747e-08	1.37899e-05	ENST00000394336+ENST00000358455	pseduogene	87.181
ENSG00000178982	EIF3K	130.504656515693	0.521655	0.115629925631662	4.51141825319709	6.43956007376127e-06	0.000479494	ENST00000593149+ENST00000248342+ENST00000588934+ENST00000538434+ENST00000593062+ENST00000586932+ENST00000545173+ENST00000589307+ENST00000591409+ENST00000586513+ENST00000588422+ENST00000592558+ENST00000588299+ENST00000590134	protein_coding	86.8685
ENSG00000167515	TRAPPC2L	109.414347641017	0.428362	0.127402616963546	3.36226655525661	0.000773054601733159	0.0160692	ENST00000564365+ENST00000301021+ENST00000564547+ENST00000565504+ENST00000565205+ENST00000567312+ENST00000568583+ENST00000564404+ENST00000565309+ENST00000567895+ENST00000562792+ENST00000561840+ENST00000562125+ENST00000563514	protein_coding	86.2289
ENSG00000069849	ATP1B3	181.393904440174	0.459116	0.0903957851969834	5.07895262085374	3.79521333923489e-07	4.9454e-05	ENST00000475483+ENST00000286371+ENST00000465172+ENST00000539728+ENST00000466678+ENST00000462082+ENST00000495216+ENST00000482635+ENST00000487199+ENST00000484727+ENST00000486782	protein_coding	85.8015
ENSG00000116459	ATP5F1	122.432689962869	0.349851	0.0972270615611134	3.5982834183625	0.000320324442928984	0.00872215	ENST00000493119+ENST00000369722+ENST00000369721+ENST00000483994+ENST00000468818+ENST00000464154	protein_coding	85.4393
ENSG00000174903	RAB1B	112.370102355141	-0.53243	0.133039129046009	-4.00205483868053	6.27947391404169e-05	0.00265174	ENST00000311481+ENST00000527397	protein_coding	85.3158
ENSG00000159348	CYB5R1	213.476171454009	0.321538	0.101241058832558	3.17596908230623	0.00149336866330846	0.0254373	ENST00000367249+ENST00000497655+ENST00000482572+ENST00000483915+ENST00000446185+ENST00000473599+ENST00000478009	protein_coding	84.9943
ENSG00000184207	PGP	114.455526236831	0.401862	0.112272279284385	3.57935453238392	0.000344443916975133	0.00912492	ENST00000333503+ENST00000562001	protein_coding	84.9897
ENSG00000187147	RNF220	295.515824968837	-0.364714	0.0967696505341486	-3.76888913623554	0.000163975693412489	0.00531684	ENST00000355387+ENST00000361799+ENST00000487332+ENST00000372247+ENST00000470498+ENST00000443020+ENST00000496262+ENST00000453863+ENST00000440132+ENST00000335497+ENST00000474064+ENST00000471494+ENST00000488865+ENST00000497469+ENST00000475378+ENST00000484745+ENST00000474394+ENST00000480686+ENST00000474956	protein_coding	84.5173
ENSG00000121022	COPS5	107.203768753939	0.46238	0.114569481433091	4.0358072928299	5.44148668152217e-05	0.00242414	ENST00000517736+ENST00000521509+ENST00000357849+ENST00000523086+ENST00000518374+ENST00000521386+ENST00000523890+ENST00000518747+ENST00000517793+ENST00000517406+ENST00000519963+ENST00000519057+ENST00000518768	protein_coding	84.2008
ENSG00000108826	MRPL27	108.65414733026	0.441485	0.134686091856952	3.2778831099303	0.00104588696048267	0.0196625	ENST00000507088+ENST00000508200+ENST00000225969+ENST00000442592+ENST00000503633+ENST00000511860+ENST00000514928	protein_coding	84.1408
ENSG00000138069	RAB1A	280.334920176063	0.436865	0.104183333242699	4.19323235479881	2.75007500882194e-05	0.00144061	ENST00000494188+ENST00000409784+ENST00000409892+ENST00000409751+ENST00000398529+ENST00000260638+ENST00000356214	protein_coding	83.5868
ENSG00000185236	RAB11B	169.59042766944	-0.620309	0.12914196904197	-4.80331426319365	1.56060653158738e-06	0.000153477	ENST00000600719+ENST00000328024+ENST00000598706+ENST00000594216+ENST00000601897	protein_coding	83.3431
ENSG00000146701	MDH2	305.946792746082	0.325036	0.0785713103799139	4.13683385932318	3.5213087489747e-05	0.00175217	ENST00000461263+ENST00000315758+ENST00000443006+ENST00000461665+ENST00000432020+ENST00000490105+ENST00000492663+ENST00000424167	protein_coding	82.9546
ENSG00000138629	UBL7	94.2199169784492	0.575161	0.135077491991121	4.25800836594558	2.06256232201179e-05	0.00117401	ENST00000361351+ENST00000395081+ENST00000565335+ENST00000567435+ENST00000566365+ENST00000565494+ENST00000564488+ENST00000565130+ENST00000563081	protein_coding	82.9341
ENSG00000148834	GSTO1	115.214329986432	0.486779	0.119444003337033	4.07537257400225	4.59407335843639e-05	0.00213323	ENST00000470554+ENST00000493946+ENST00000539281+ENST00000369710+ENST00000369713+ENST00000445155+ENST00000432659	protein_coding	82.762
ENSG00000085662	AKR1B1	227.27313329155	0.564531	0.0919737069086421	6.13795765938403	8.35891327389312e-10	3.78859e-07	ENST00000285930+ENST00000434222+ENST00000465351+ENST00000467251+ENST00000498771+ENST00000498373+ENST00000487438+ENST00000489022+ENST00000491741+ENST00000497983+ENST00000484592+ENST00000467829+ENST00000426422+ENST00000462784	protein_coding	82.5586
ENSG00000107959	PITRM1	157.03579547119	0.311836	0.104214535290827	2.99225237500356	0.00276927225682627	0.038594	ENST00000464395+ENST00000490510+ENST00000380989+ENST00000224949+ENST00000380994+ENST00000451104+ENST00000455371+ENST00000451454+ENST00000424714+ENST00000430362+ENST00000488065	protein_coding	82.2239
ENSG00000143333	RGS16	394.047504040588	0.577628	0.126322254609114	4.57265593444704	4.81580578329851e-06	0.000376048	ENST00000367558	protein_coding	82.0847
ENSG00000178952	TUFM	212.702532305146	0.291564	0.0883562607312384	3.29986242489085	0.00096732235759155	0.0187667	ENST00000313511+ENST00000569217+ENST00000565012+ENST00000561644	protein_coding	81.7918
ENSG00000107742	SPOCK2	606.077392152596	-0.365559	0.0735134925918717	-4.97268204014518	6.60329156265352e-07	7.73438e-05	ENST00000536168+ENST00000317376+ENST00000373109+ENST00000463279+ENST00000469121+ENST00000460053+ENST00000412663+ENST00000495888+ENST00000483699	protein_coding	81.1935
ENSG00000008056	SYN1	371.579261698057	-0.374536	0.0976736507506146	-3.8345606960383	0.000125788908916862	0.00436433	ENST00000340666+ENST00000295987	protein_coding	80.126
ENSG00000148356	LRSAM1	64.18155310823	-0.637149	0.13897882189859	-4.58450718830086	4.55058433088789e-06	0.000359376	ENST00000300417+ENST00000373324+ENST00000323301+ENST00000486587+ENST00000485704+ENST00000373322+ENST00000498513+ENST00000483302+ENST00000472068+ENST00000476755	protein_coding	79.1048
ENSG00000242372	EIF6	88.497838038441	0.338689	0.0975886617012724	3.47058002231405	0.000519335572230375	0.0120454	ENST00000374450+ENST00000447927+ENST00000374443+ENST00000374436+ENST00000440766+ENST00000415116+ENST00000462894+ENST00000456600	protein_coding	79.0126
ENSG00000022267	FHL1	309.206532762433	0.258781	0.0839321112626043	3.08322129256116	0.00204772820439116	0.031277	ENST00000394155+ENST00000370690+ENST00000420362+ENST00000458357+ENST00000535737+ENST00000452016+ENST00000434885+ENST00000543669+ENST00000394153+ENST00000456445+ENST00000449474+ENST00000345434+ENST00000539015+ENST00000370683+ENST00000370676+ENST00000477204+ENST00000370674+ENST00000477080	protein_coding	78.5846
ENSG00000113575	PPP2CA	556.574738512647	0.212036	0.0674676221429701	3.14277877307101	0.00167352270280355	0.0272588	ENST00000481195+ENST00000472253+ENST00000495833+ENST00000522385+ENST00000523082+ENST00000231504	protein_coding	78.3154
ENSG00000196972	LINC00087	297.379247504443	-0.320249	0.0851157339253886	-3.76250865733919	0.000168217483412227	0.00542905	ENST00000433425+ENST00000535837	lincRNA	77.9302
ENSG00000103528	SYT17	351.965226638898	-0.332505	0.0865983396287316	-3.83962412453842	0.000123222818949657	0.00429611	ENST00000570264+ENST00000566261+ENST00000355377+ENST00000568115+ENST00000562034+ENST00000562711+ENST00000562274+ENST00000565183+ENST00000568433	protein_coding	77.6816
ENSG00000099341	PSMD8	196.472712827783	0.360994	0.0876291051244494	4.11956700601357	3.79585030847088e-05	0.00187535	ENST00000215071+ENST00000585598+ENST00000602911+ENST00000591216+ENST00000592561+ENST00000592001+ENST00000592035+ENST00000591250+ENST00000590331	protein_coding	77.4722
ENSG00000158864	NDUFS2	169.447593406476	0.453374	0.0998602284672101	4.54008247246352	5.62322285904336e-06	0.000434217	ENST00000479948+ENST00000496133+ENST00000367993+ENST00000496553+ENST00000392179+ENST00000467295+ENST00000476409+ENST00000475570+ENST00000478866+ENST00000473321+ENST00000483804+ENST00000480762+ENST00000465923+ENST00000493849+ENST00000468828+ENST00000492153	protein_coding	76.4648
ENSG00000181991	MRPS11	102.521768015659	0.386585	0.122358640204785	3.15944322932637	0.00158070892854156	0.0262809	ENST00000325844+ENST00000560708+ENST00000559125+ENST00000557974+ENST00000559323+ENST00000560850+ENST00000353598+ENST00000558406+ENST00000559557+ENST00000558548+ENST00000561262	protein_coding	76.4548
ENSG00000213619	NDUFS3	113.797713609299	0.619496	0.121606499531627	5.09426979488645	3.50087929294331e-07	4.7396e-05	ENST00000533507+ENST00000263774+ENST00000528192+ENST00000534208+ENST00000530295+ENST00000534716+ENST00000533105+ENST00000524568+ENST00000531351+ENST00000525378+ENST00000525212+ENST00000527178+ENST00000529276	protein_coding	76.1261
ENSG00000113811	SELK	148.155234239753	0.308372	0.105424268984305	2.92506010289371	0.00344389700927252	0.0448556	ENST00000495461+ENST00000541726+ENST00000488746+ENST00000487571+ENST00000485414	protein_coding	75.9903
ENSG00000242485	MRPL20	78.8597655576761	0.560589	0.146254965787331	3.83295951316973	0.000126610797668869	0.0043849	ENST00000344843+ENST00000487659+ENST00000493287+ENST00000492508+ENST00000482352+ENST00000477686	protein_coding	75.7366
ENSG00000141367	CLTC	726.744636108941	0.374619	0.0717092839777622	5.22413058436849	1.74975270120338e-07	2.6824e-05	ENST00000269122+ENST00000393043+ENST00000580081+ENST00000579456+ENST00000584313+ENST00000585198+ENST00000472129+ENST00000483176+ENST00000466513+ENST00000579815+ENST00000496076+ENST00000472651+ENST00000475458+ENST00000498711	protein_coding	75.4375
ENSG00000155506	LARP1	782.826940404721	-0.183146	0.0614604394005851	-2.9799071257752	0.00288335789419384	0.0396538	ENST00000336314+ENST00000518297+ENST00000517616+ENST00000521577+ENST00000519931+ENST00000524248+ENST00000523163+ENST00000518194+ENST00000518595+ENST00000518742+ENST00000518677+ENST00000522272+ENST00000519194+ENST00000524187+ENST00000518892	protein_coding	75.0272
ENSG00000122545	2007-09-01	167.526452269774	0.587413	0.105137809000534	5.5870791209435	2.30920533815282e-08	5.3494e-06	ENST00000435235+ENST00000469679+ENST00000350320+ENST00000399034+ENST00000399035+ENST00000475109+ENST00000493626+ENST00000494488+ENST00000425198+ENST00000473201+ENST00000432293+ENST00000492940+ENST00000485569	protein_coding	74.8222
ENSG00000140740	UQCRC2	174.738234966594	0.307658	0.0869562469775446	3.5380768994764	0.000403052656237702	0.0101488	ENST00000268379+ENST00000565464+ENST00000561553+ENST00000567757+ENST00000563898+ENST00000565331+ENST00000564095+ENST00000567597+ENST00000563711+ENST00000567810+ENST00000561798	protein_coding	74.7314
ENSG00000172889	EGFL7	135.048137651021	-0.508069	0.143263974408355	-3.54638052354313	0.000390561798040985	0.00989407	ENST00000371699+ENST00000406555+ENST00000490469+ENST00000308874+ENST00000492862+ENST00000371698+ENST00000492002	protein_coding	74.6032
ENSG00000188229	TUBB4B	182.06406191833	0.38689	0.109484630684208	3.53373903505996	0.000409725409284831	0.0102181	ENST00000340384+ENST00000604929	protein_coding	74.3942
ENSG00000120306	CYSTM1	214.436080901034	0.668378	0.102905155602568	6.49509241731665	8.29824542861288e-11	6.17893e-08	ENST00000261811+ENST00000509589+ENST00000509789+ENST00000504227	protein_coding	74.252
ENSG00000179115	FARSA	182.651732571469	0.353721	0.117547597694143	3.00917407756961	0.00261958974509324	0.0371031	ENST00000588025+ENST00000314606+ENST00000423140+ENST00000586146+ENST00000588965+ENST00000587488+ENST00000593021+ENST00000592662+ENST00000586280+ENST00000587981	protein_coding	74.0461
ENSG00000189058	APOD	128.669922312425	-0.657746	0.18218386207073	-3.61034094283984	0.000305794779434419	0.00846682	ENST00000343267+ENST00000458447+ENST00000421243+ENST00000453131+ENST00000463719	protein_coding	73.8902
ENSG00000116209	TMEM59	210.909895418911	0.438524	0.0954821953433598	4.59272846387981	4.37488146874323e-06	0.00034777	ENST00000371348+ENST00000234831+ENST00000371344+ENST00000371341+ENST00000470395+ENST00000440019+ENST00000420738+ENST00000452421+ENST00000371337	protein_coding	73.3769
ENSG00000176454	LPCAT4	139.894918613616	-0.333565	0.100837052894681	-3.30796220081779	0.000939774930397407	0.0183458	ENST00000314891+ENST00000563748+ENST00000567507+ENST00000563240+ENST00000562404+ENST00000566581+ENST00000569804+ENST00000562431	protein_coding	73.0694
ENSG00000133142	TCEAL4	158.54199839434	0.313469	0.107174725732677	2.92484053236996	0.00344632779598713	0.0448556	ENST00000372629+ENST00000468024+ENST00000459722+ENST00000434216+ENST00000425011+ENST00000481555+ENST00000472484+ENST00000490644+ENST00000472745+ENST00000494801+ENST00000469586+ENST00000415568	protein_coding	72.5942
ENSG00000175203	DCTN2	294.073610994128	0.589337	0.0892518195954144	6.60307830016563	4.02706700859793e-11	3.81638e-08	ENST00000548249+ENST00000537439+ENST00000543672+ENST00000434715+ENST00000550201+ENST00000549394+ENST00000546758+ENST00000550988+ENST00000552390+ENST00000550086+ENST00000550954+ENST00000551872+ENST00000548736+ENST00000546670+ENST00000551611+ENST00000546965+ENST00000550750+ENST00000548949+ENST00000551142+ENST00000547345+ENST00000551400+ENST00000550576+ENST00000547480+ENST00000546559+ENST00000549712	protein_coding	72.423
ENSG00000213442	RPL18AP3	11.3141328457597	0.358467	0.111176518239221	3.22430099104235	0.00126280594084633	0.0224226	ENST00000394214+ENST00000462885	pseduogene	72.4003
ENSG00000106105	GARS	155.182485603995	0.381472	0.110202694331269	3.46154434439404	0.000537085630815517	0.0122608	ENST00000389266+ENST00000454308+ENST00000478124+ENST00000484093+ENST00000470392+ENST00000444666+ENST00000465748+ENST00000485784+ENST00000496643	protein_coding	72.1127
ENSG00000089063	TMEM230	138.17568885301	0.379604	0.109090467563906	3.47971532855897	0.000501946821756463	0.0118145	ENST00000202834+ENST00000342308+ENST00000379283+ENST00000379279+ENST00000379286+ENST00000379299+ENST00000492419+ENST00000379277+ENST00000379276	protein_coding	71.8505
ENSG00000163399	ATP1A1	356.679400042012	0.366341	0.0778165285888318	4.70775303136865	2.50462287000095e-06	0.000220394	ENST00000418797+ENST00000295598+ENST00000488733+ENST00000537345+ENST00000369494+ENST00000369496+ENST00000463382+ENST00000491156+ENST00000440951+ENST00000479960+ENST00000495965	protein_coding	71.4811
ENSG00000147669	POLR2K	133.690901262782	0.435304	0.128551589096627	3.38622154666595	0.000708621501548897	0.0151627	ENST00000353107+ENST00000522439+ENST00000519765	protein_coding	71.1402
ENSG00000134153	EMC7	159.351120263371	0.402649	0.11667203051325	3.45111569725218	0.000558274192109983	0.0126516	ENST00000256545+ENST00000527822+ENST00000528949+ENST00000532113	protein_coding	70.9859
ENSG00000086061	DNAJA1	314.353741247996	0.47759	0.111517181061786	4.28265604581865	1.84675531008079e-05	0.00107251	ENST00000330899+ENST00000544625+ENST00000495015+ENST00000465677	protein_coding	70.7737
ENSG00000248626	GAPDHP40	134.85634854471	0.482196	0.114938129634023	4.19526522371363	2.72552472119741e-05	0.00143158	ENST00000505218	pseduogene	69.866
ENSG00000189159	HN1	171.38532880858	0.37873	0.0900557852741758	4.20550711804107	2.60497389521457e-05	0.00139617	ENST00000405458+ENST00000409753+ENST00000476258+ENST00000482348+ENST00000356033+ENST00000304834+ENST00000470924+ENST00000481094+ENST00000481647+ENST00000392566+ENST00000580380+ENST00000581874+ENST00000584079+ENST00000465454	protein_coding	69.7055
ENSG00000184277	TM2D3	154.0985108538	0.419144	0.118605720757242	3.53392582374159	0.000409435966959175	0.0102181	ENST00000560883+ENST00000559107+ENST00000428002+ENST00000560390+ENST00000558129+ENST00000347970+ENST00000333202+ENST00000559891+ENST00000561373+ENST00000560013+ENST00000558677+ENST00000559024+ENST00000560910+ENST00000560212+ENST00000561356	protein_coding	68.6633
ENSG00000085231	TAF9	125.456637600156	0.439974	0.12010746750618	3.66316990551985	0.000249113181099159	0.0073462	ENST00000380822+ENST00000502819+ENST00000380818+ENST00000512561+ENST00000506736+ENST00000328663+ENST00000217893+ENST00000503245+ENST00000509462+ENST00000504109+ENST00000512152+ENST00000508954	protein_coding	67.9893
ENSG00000230910	RP3-525N10.2	57.7209476584052	-0.558919	0.173356504546257	-3.22410135473706	0.00126368664747988	0.0224226	ENST00000603261+ENST00000604392+ENST00000419979	antisense	67.4369
ENSG00000134108	ARL8B	316.584526705882	0.25067	0.0775537755469475	3.23220682916226	0.00122838110426447	0.0220211	ENST00000256496+ENST00000429403+ENST00000455168+ENST00000444332+ENST00000419534+ENST00000468010+ENST00000476343	protein_coding	66.6531
ENSG00000049656	CLPTM1L	181.602565358578	-0.329	0.090011030334013	-3.65510882834351	0.000257072904172825	0.00745917	ENST00000320895+ENST00000507807+ENST00000320927+ENST00000503042+ENST00000503534+ENST00000515719+ENST00000506641+ENST00000511268+ENST00000512451+ENST00000507195+ENST00000505914+ENST00000505605+ENST00000503151+ENST00000508765+ENST00000513250+ENST00000511786	protein_coding	66.427
ENSG00000168894	RNF181	62.4471259430011	0.454659	0.148869737309287	3.05407502900081	0.00225755612454258	0.03324	ENST00000441634+ENST00000461845+ENST00000306368+ENST00000414390+ENST00000443647+ENST00000456023	protein_coding	66.4256
ENSG00000106537	TSPAN13	260.876655693557	0.321448	0.0946107454741626	3.39758138422644	0.000679843629849209	0.0147034	ENST00000262067+ENST00000466195	protein_coding	66.396
ENSG00000139200	PIANP	231.604710812426	-0.515864	0.103002400711732	-5.00826806630434	5.49220061014572e-07	6.73539e-05	ENST00000534837+ENST00000320591+ENST00000540656+ENST00000545917+ENST00000542740+ENST00000536467	protein_coding	66.2659
ENSG00000233954	RP11-169K16.7	17.027471266212	0.739956	0.15084385650312	4.90544148488835	9.32174284774435e-07	0.00010393	ENST00000538385+ENST00000483273	pseduogene	66.2355
ENSG00000169021	UQCRFS1	102.560722519018	0.642719	0.0963368987027022	6.671573993017	2.53074302142768e-11	2.51255e-08	ENST00000304863	protein_coding	66.084
ENSG00000213190	MLLT11	455.344679755985	0.50114	0.106451199628942	4.70769626965785	2.50532019076275e-06	0.000220394	ENST00000368921	protein_coding	65.7096
ENSG00000091592	NLRP1	290.761013419996	-0.434747	0.113155150867356	-3.84204469882349	0.00012201360851344	0.00426107	ENST00000544378+ENST00000574406+ENST00000568641+ENST00000262467+ENST00000574512+ENST00000345221+ENST00000571451+ENST00000269280+ENST00000577119+ENST00000354411+ENST00000572272+ENST00000571307+ENST00000576905+ENST00000572143	protein_coding	65.2309
ENSG00000131236	CAP1	266.070863805072	0.316391	0.0741602032204563	4.26632363412336	1.98720452286308e-05	0.00114136	ENST00000372797+ENST00000372802+ENST00000449311+ENST00000421589+ENST00000414893+ENST00000414281+ENST00000420216+ENST00000372792+ENST00000372798+ENST00000340450+ENST00000372805+ENST00000435719+ENST00000427843+ENST00000424977+ENST00000417287+ENST00000446031+ENST00000479759+ENST00000461993+ENST00000494114	protein_coding	64.6533
ENSG00000116161	CACYBP	220.640561739684	0.377433	0.0971213749924781	3.88619748853667	0.000101826678305956	0.00369714	ENST00000367681+ENST00000426793+ENST00000461977+ENST00000367679+ENST00000483307+ENST00000473925+ENST00000406752+ENST00000405362+ENST00000469173	protein_coding	64.2455
ENSG00000135624	CCT7	153.11913370051	0.337485	0.111942997528138	3.01479444444093	0.00257153471100021	0.0365716	ENST00000471927+ENST00000469844+ENST00000473197+ENST00000492253+ENST00000539919+ENST00000399032+ENST00000258091+ENST00000461290+ENST00000464397+ENST00000537131+ENST00000409924+ENST00000480489+ENST00000538797+ENST00000482064+ENST00000540468+ENST00000473786+ENST00000488856+ENST00000398422	protein_coding	63.5826
ENSG00000119801	YPEL5	239.225366171919	0.261031	0.0816743088814667	3.19600051568749	0.00139346862734801	0.0242508	ENST00000379519+ENST00000379520+ENST00000261353+ENST00000490211+ENST00000402003+ENST00000482474+ENST00000492439+ENST00000402708+ENST00000470120+ENST00000495673	protein_coding	62.9019
ENSG00000005022	SLC25A5	121.949143438653	0.704823	0.131267891368036	5.36934655263085	7.90224403926486e-08	1.40815e-05	ENST00000317881+ENST00000460013+ENST00000475354+ENST00000463551	protein_coding	62.8627
ENSG00000094631	HDAC6	81.9903449073098	0.379999	0.125420053541047	3.02980715234863	0.00244709936262099	0.0352832	ENST00000423941+ENST00000438518+ENST00000376643+ENST00000469223+ENST00000444343+ENST00000376610+ENST00000334136+ENST00000462730+ENST00000376619+ENST00000477528+ENST00000465269+ENST00000477561+ENST00000481929+ENST00000441703+ENST00000426196+ENST00000443563+ENST00000440653+ENST00000468949+ENST00000483656+ENST00000476625+ENST00000413163+ENST00000489352+ENST00000493923+ENST00000461608+ENST00000486227…	protein_coding	62.7892
ENSG00000105677	TMEM147	129.272905777203	0.341723	0.115257812694743	2.96485470847535	0.00302825912307388	0.0412385	ENST00000222284+ENST00000593027+ENST00000392204+ENST00000477168+ENST00000595180+ENST00000596232+ENST00000595467+ENST00000599895+ENST00000392205	protein_coding	62.2201
ENSG00000147123	NDUFB11	107.361196628567	0.68349	0.128108473442355	5.33524156841642	9.54174394539666e-08	1.63062e-05	ENST00000377811+ENST00000276062	protein_coding	61.8823
ENSG00000138698	RAP1GDS1	422.073757182694	0.597419	0.100661196207487	5.93494563606431	2.9394288123889e-09	1.17854e-06	ENST00000509011+ENST00000503667+ENST00000380158+ENST00000508490+ENST00000264572+ENST00000505378+ENST00000508213+ENST00000408927+ENST00000512857+ENST00000511379+ENST00000514122+ENST00000453712+ENST00000515187+ENST00000511212+ENST00000510870+ENST00000507303+ENST00000339360+ENST00000408900+ENST00000503745+ENST00000509501+ENST00000514139	protein_coding	61.6161
ENSG00000117592	PRDX6	206.243238092408	0.378377	0.0909971248526815	4.15811834401189	3.20879786645628e-05	0.00162753	ENST00000340385+ENST00000460950+ENST00000470017	protein_coding	61.4936
ENSG00000102316	MAGED2	239.203621928401	0.26938	0.0817112459159708	3.29672626486875	0.000978187875831463	0.0188059	ENST00000375068+ENST00000375053+ENST00000347546+ENST00000463787+ENST00000375062+ENST00000218439+ENST00000375060+ENST00000375058+ENST00000396224+ENST00000485483+ENST00000497484+ENST00000487482+ENST00000487463	protein_coding	61.4905
ENSG00000008394	MGST1	95.6896901606865	-0.830056	0.212732479477955	-3.90187634086735	9.54499187198243e-05	0.00352219	ENST00000010404+ENST00000536371+ENST00000543076+ENST00000396210+ENST00000539036+ENST00000537878+ENST00000539708+ENST00000535309+ENST00000396209+ENST00000540056+ENST00000540126+ENST00000538885+ENST00000396207+ENST00000538857+ENST00000542256+ENST00000535624+ENST00000534835+ENST00000359720	protein_coding	61.2971
ENSG00000145248	SLC10A4	210.565601233742	0.392588	0.11283429139265	3.47932990226381	0.000502669363475836	0.0118153	ENST00000273861	protein_coding	61.0022
ENSG00000079459	FDFT1	182.993881413542	0.268513	0.0884194857670314	3.03680933165315	0.00239096643055687	0.0346898	ENST00000538689+ENST00000530337+ENST00000220584+ENST00000443614+ENST00000525607+ENST00000525900+ENST00000528812+ENST00000530664+ENST00000525954+ENST00000531733+ENST00000531249+ENST00000532266+ENST00000529464+ENST00000528643+ENST00000525777+ENST00000525283+ENST00000528729+ENST00000446331+ENST00000529521+ENST00000525571+ENST00000527045+ENST00000525551	protein_coding	60.951
ENSG00000213593	TMX2	109.364303086118	0.361736	0.0925056399890933	3.91041801321386	9.2136530823492e-05	0.00343028	ENST00000524972+ENST00000378312+ENST00000278422+ENST00000525035+ENST00000529403+ENST00000528110+ENST00000530114+ENST00000533602+ENST00000528042	protein_coding	60.6347
ENSG00000109107	ALDOC	162.884930331727	0.595224	0.147803415989538	4.02713267364138	5.6461176594264e-05	0.00249398	ENST00000226253+ENST00000395321+ENST00000395319+ENST00000460201+ENST00000584086+ENST00000581807+ENST00000435638+ENST00000578590+ENST00000582381	protein_coding	60.4914
ENSG00000095059	DHPS	33.6014064890708	0.627145	0.176245649628341	3.5583558836136	0.000373183457414699	0.00958071	ENST00000598246+ENST00000210060+ENST00000600639+ENST00000351660+ENST00000600864+ENST00000601639+ENST00000594424+ENST00000600510+ENST00000601537+ENST00000595844+ENST00000593400+ENST00000596847+ENST00000595912+ENST00000600451+ENST00000597152+ENST00000598850+ENST00000596162+ENST00000593432+ENST00000599481+ENST00000593423+ENST00000595100+ENST00000593473	protein_coding	59.8451
ENSG00000089199	CHGB	291.812465458132	0.552116	0.149174052080922	3.70115067440665	0.000214623977642806	0.00654123	ENST00000378961+ENST00000455042+ENST00000488832	protein_coding	59.7545
ENSG00000128609	NDUFA5	182.555357574274	0.4869	0.0978401138354923	4.97649047741878	6.47474600615066e-07	7.62667e-05	ENST00000471770+ENST00000355749+ENST00000378795+ENST00000459880+ENST00000466896+ENST00000467117+ENST00000470123+ENST00000492549+ENST00000491033+ENST00000490618	protein_coding	59.754
ENSG00000101188	NTSR1	313.567561298218	-0.450679	0.135463474350083	-3.32693858874484	0.000878057218843491	0.0174515	ENST00000370501+ENST00000482259	protein_coding	59.7489
ENSG00000168036	CTNNB1	373.380473657759	0.402536	0.100435248305749	4.00792013776915	6.12558257597482e-05	0.00261663	ENST00000426215+ENST00000405570+ENST00000433400+ENST00000431914+ENST00000396183+ENST00000349496+ENST00000453024+ENST00000396185+ENST00000450969+ENST00000441708+ENST00000488914+ENST00000465552+ENST00000482042+ENST00000485265+ENST00000471014	protein_coding	58.9295
ENSG00000160310	PRMT2	190.247773602789	-0.349651	0.0982698978854063	-3.55806508502057	0.000373596753375929	0.00958071	ENST00000355680+ENST00000397638+ENST00000291705+ENST00000451211+ENST00000458387+ENST00000397637+ENST00000334494+ENST00000397628+ENST00000440086+ENST00000482508+ENST00000481861+ENST00000455177+ENST00000491389+ENST00000498151+ENST00000486520	protein_coding	58.4682
ENSG00000105701	FKBP8	116.556642939439	-0.687788	0.165398515531531	-4.15837102701762	3.20525117492563e-05	0.00162753	ENST00000597960+ENST00000610101+ENST00000544835+ENST00000608443+ENST00000222308+ENST00000596558+ENST00000601844+ENST00000453489+ENST00000596015+ENST00000606531+ENST00000596494+ENST00000597611+ENST00000599540+ENST00000594844+ENST00000597547+ENST00000609656	protein_coding	58.3809
ENSG00000166257	SCN3B	582.329448506405	-0.316812	0.0695609049563718	-4.55445762478363	5.25209101960994e-06	0.000408585	ENST00000527125+ENST00000299333+ENST00000392770+ENST00000530277+ENST00000527836+ENST00000528267	protein_coding	58.1847
ENSG00000114480	GBE1	379.27161485246	0.496265	0.104988326396351	4.72685918718343	2.2801927131254e-06	0.00020786	ENST00000429644+ENST00000489715+ENST00000484687+ENST00000498468+ENST00000486920+ENST00000477426	protein_coding	57.9959
ENSG00000212864	RNF208	84.0725974452385	-0.556031	0.155772775739376	-3.56950109314076	0.000357661725201456	0.00934194	ENST00000391553+ENST00000392827	protein_coding	57.3496
ENSG00000127585	FBXL16	203.658661591145	-0.260984	0.0700601037003842	-3.72514525021542	0.000195202791086693	0.00610287	ENST00000397621+ENST00000562648+ENST00000324361+ENST00000562563+ENST00000562585	protein_coding	57.2573
ENSG00000101204	CHRNA4	385.503574800421	-0.523766	0.08791864093629	-5.95739379364125	2.56292162138796e-09	1.04773e-06	ENST00000370263+ENST00000463705+ENST00000467563+ENST00000498043+ENST00000475033+ENST00000480012	protein_coding	56.2494
ENSG00000187446	CHP1	257.065742475363	0.308713	0.106206154829071	2.90673164928791	0.00365226365534221	0.0469168	ENST00000558351+ENST00000334660+ENST00000560784+ENST00000392151+ENST00000561280+ENST00000560397+ENST00000560411+ENST00000560633+ENST00000560965	protein_coding	55.9525
ENSG00000175826	CTDNEP1	52.0068945544151	-0.526269	0.107784869585512	-4.88258442006923	1.04704389059892e-06	0.000113697	ENST00000574322+ENST00000570828+ENST00000573600+ENST00000574205+ENST00000318988+ENST00000572043+ENST00000570484+ENST00000576613+ENST00000575783+ENST00000570385+ENST00000570380+ENST00000571409	protein_coding	55.8887
ENSG00000173786	CNP	190.929898391969	-0.412607	0.135978507739334	-3.03435374023638	0.0024105160534087	0.0348764	ENST00000393892+ENST00000472031+ENST00000591072+ENST00000591945+ENST00000587679+ENST00000592446+ENST00000393888+ENST00000441615+ENST00000589772+ENST00000585452+ENST00000592105+ENST00000486438+ENST00000592861	protein_coding	55.7481
ENSG00000130312	MRPL34	77.2594807027648	0.417639	0.128064728182186	3.26115219723876	0.00110960464604528	0.0205454	ENST00000595444+ENST00000600434+ENST00000594999+ENST00000252602+ENST00000602206+ENST00000597996	protein_coding	55.6353
ENSG00000132432	SEC61G	44.0676614072502	0.417784	0.136088272127924	3.06994713619611	0.00214096662512918	0.0321361	ENST00000395535+ENST00000352861+ENST00000415949+ENST00000450622+ENST00000460484+ENST00000480303+ENST00000461536	protein_coding	55.3655
ENSG00000107282	APBA1	518.40172155811	-0.317902	0.0772782521733786	-4.11372879733723	3.8931879527185e-05	0.00189205	ENST00000265381+ENST00000470082	protein_coding	55.3646
ENSG00000106028	SSBP1	67.2533635353801	0.41786	0.133707964795508	3.12516943983822	0.0017770266875007	0.0285433	ENST00000265304+ENST00000498107+ENST00000496622+ENST00000489378+ENST00000469123+ENST00000467681+ENST00000465582+ENST00000463093+ENST00000461433+ENST00000465167+ENST00000468267+ENST00000484178+ENST00000473783+ENST00000481508	protein_coding	55.041
ENSG00000089818	NECAP1	229.266958552954	0.367258	0.0917610308317097	4.00232911215373	6.27219680071588e-05	0.00265174	ENST00000339754+ENST00000546181+ENST00000542095+ENST00000450991+ENST00000545807+ENST00000544891+ENST00000541948+ENST00000540083+ENST00000537796	protein_coding	54.5717
ENSG00000113648	H2AFY	149.854199519317	0.38822	0.0991181843444612	3.91673608002844	8.97559169961882e-05	0.00338394	ENST00000511689+ENST00000512507+ENST00000451949+ENST00000304332+ENST00000312469+ENST00000360597+ENST00000511494+ENST00000506671+ENST00000423969+ENST00000510038+ENST00000505827+ENST00000513268+ENST00000507868+ENST00000508785+ENST00000513210+ENST00000504197+ENST00000508120+ENST00000506532+ENST00000506218+ENST00000508962	protein_coding	54.4065
ENSG00000231549	USMG5P1	12.9324157776951	0.443965	0.101259606737125	4.38442288029657	1.16293671283358e-05	0.000752395	ENST00000425964	pseduogene	54.3559
ENSG00000134440	NARS	275.417927724995	0.319589	0.0820372554137029	3.89565397414579	9.79341227399027e-05	0.00357607	ENST00000256854+ENST00000589314+ENST00000423481+ENST00000586807+ENST00000589001+ENST00000411676+ENST00000540592+ENST00000591599+ENST00000587675+ENST00000588661+ENST00000587194+ENST00000590123+ENST00000587366	protein_coding	53.97
ENSG00000134294	SLC38A2	279.021278736751	0.642241	0.111219036314709	5.77455727768795	7.71556809496937e-09	2.26566e-06	ENST00000256689+ENST00000549258+ENST00000551374+ENST00000552703+ENST00000546520+ENST00000548785+ENST00000548111+ENST00000548236+ENST00000552414+ENST00000548870+ENST00000547252+ENST00000551405+ENST00000553252	protein_coding	53.4605
ENSG00000051108	HERPUD1	140.680486540462	0.423474	0.134551560994734	3.14730138284438	0.001647850156887	0.0269135	ENST00000439977+ENST00000562914+ENST00000300302+ENST00000344114+ENST00000565966+ENST00000569569+ENST00000568676+ENST00000570273+ENST00000379792+ENST00000569429+ENST00000563343+ENST00000566550+ENST00000563781+ENST00000568358+ENST00000564678+ENST00000563911+ENST00000567944+ENST00000568651+ENST00000568814	protein_coding	52.8574
ENSG00000131779	PEX11B	79.2586699865684	0.424925	0.147648769035665	2.8779468428176	0.00400272581071456	0.0498523	ENST00000369306+ENST00000537888+ENST00000428634	protein_coding	52.7455
ENSG00000183207	RUVBL2	104.961847322609	0.503673	0.115106646018376	4.37570937334496	1.21038195966027e-05	0.00077172	ENST00000595090+ENST00000601968+ENST00000596837+ENST00000595811+ENST00000594017+ENST00000596247+ENST00000598768+ENST00000221413+ENST00000413176+ENST00000593570+ENST00000594338+ENST00000595002	protein_coding	52.2442
ENSG00000196776	CD47	441.720029769183	0.311042	0.092426496906027	3.36529004982454	0.000764632335633034	0.0159418	ENST00000471694+ENST00000355354+ENST00000517766+ENST00000398258+ENST00000361309	protein_coding	52.1835
ENSG00000234536	AC096582.7	27.8847070552246	0.60081	0.196785521339346	3.05311976215078	0.00226475533356721	0.0332881	ENST00000438487	pseduogene	52.046
ENSG00000140105	WARS	229.527689246443	0.535605	0.131748738172332	4.06535274620771	4.79598679054401e-05	0.00220246	ENST00000392882+ENST00000358655+ENST00000355338+ENST00000344102+ENST00000557135+ENST00000556645+ENST00000554950+ENST00000557614+ENST00000554601+ENST00000553395+ENST00000556504+ENST00000554084+ENST00000557722+ENST00000557297+ENST00000556435+ENST00000553808+ENST00000554331+ENST00000555063+ENST00000556338+ENST00000557239+ENST00000556698+ENST00000553524+ENST00000555410+ENST00000556579+ENST00000554772…	protein_coding	51.823
ENSG00000091164	TXNL1	185.513539197671	0.232509	0.0807545571574834	2.87920962265549	0.0039867324512786	0.0498019	ENST00000217515+ENST00000585497+ENST00000588615+ENST00000590954+ENST00000540155+ENST00000587807+ENST00000589931+ENST00000586262+ENST00000587613+ENST00000589329+ENST00000589415+ENST00000586079	protein_coding	51.3162
ENSG00000162517	PEF1	147.152026850518	0.369387	0.0955711773894997	3.86504309158266	0.000111069588531746	0.0039857	ENST00000373703+ENST00000461006+ENST00000478502+ENST00000489164+ENST00000492061+ENST00000496805+ENST00000472443+ENST00000471219+ENST00000440872	protein_coding	51.0136
ENSG00000103415	HMOX2	127.407142530192	0.423441	0.117411847460164	3.60645952124546	0.000310403253659237	0.00854901	ENST00000575051+ENST00000406590+ENST00000570646+ENST00000458134+ENST00000219700+ENST00000574466+ENST00000572812+ENST00000576827+ENST00000570445+ENST00000414777+ENST00000398595+ENST00000575129+ENST00000575120+ENST00000570622+ENST00000574594	protein_coding	50.5422
ENSG00000133243	BTBD2	143.781640888981	-0.583392	0.150015135573562	-3.88888606946404	0.000100705375584706	0.00366423	ENST00000255608+ENST00000589685+ENST00000592895+ENST00000587825+ENST00000592082+ENST00000587225+ENST00000589200+ENST00000590646+ENST00000587742+ENST00000588395	protein_coding	50.529
ENSG00000099365	STX1B	315.857089117065	-0.615688	0.128840327146458	-4.7786894747692	1.76441444434319e-06	0.000169522	ENST00000215095+ENST00000569638+ENST00000565419+ENST00000566211+ENST00000561836	protein_coding	50.3917
ENSG00000145494	NDUFS6	108.30324920616	0.510603	0.109496525451873	4.66318616374359	3.11350856066121e-06	0.000262112	ENST00000274137+ENST00000469176+ENST00000510329	protein_coding	50.342
ENSG00000196072	BLOC1S2	128.499550467326	0.482919	0.12015537107481	4.01911838825764	5.84163143783228e-05	0.00254795	ENST00000441611+ENST00000370372+ENST00000579542+ENST00000361832	protein_coding	50.2873
ENSG00000235297	FAUP1	26.0719537081352	0.419946	0.121070225989551	3.46861850385507	0.000523141748456462	0.0120674	ENST00000474180	pseduogene	50.0796
ENSG00000112983	BRD8	83.2941007344931	-0.378128	0.118936935855686	-3.17923228060543	0.00147665706972642	0.0252973	ENST00000254900+ENST00000427976+ENST00000402931+ENST00000230901+ENST00000472478+ENST00000512140+ENST00000455658+ENST00000460746+ENST00000418329+ENST00000454473+ENST00000441656+ENST00000411594+ENST00000489351+ENST00000515014+ENST00000506167+ENST00000511898+ENST00000483805+ENST00000463620+ENST00000453824+ENST00000471892+ENST00000428808+ENST00000432618+ENST00000425764+ENST00000450756+ENST00000515254…	protein_coding	49.9629
ENSG00000168291	PDHB	119.825275728174	0.339835	0.107036968213637	3.17493091519255	0.00149872178430469	0.0254811	ENST00000383714+ENST00000302746+ENST00000469364+ENST00000485460+ENST00000479945+ENST00000474765+ENST00000461692+ENST00000480626+ENST00000482894+ENST00000469827	protein_coding	49.3504
ENSG00000141698	NT5C3B	96.9014461882911	0.403639	0.110039894735873	3.66811194285792	0.000244348204848165	0.00723639	ENST00000269534+ENST00000523903+ENST00000469698+ENST00000517701+ENST00000521789+ENST00000470690+ENST00000393910+ENST00000435506+ENST00000415460+ENST00000445655+ENST00000476921+ENST00000486304+ENST00000460893+ENST00000481693+ENST00000475053+ENST00000495317+ENST00000520442	protein_coding	48.9882
ENSG00000169926	KLF13	38.5910740102845	-0.469873	0.153213777377101	-3.06678301837073	0.0021637586252261	0.0323849	ENST00000307145+ENST00000558921+ENST00000560473+ENST00000558844+ENST00000558673+ENST00000558225+ENST00000500533	protein_coding	48.8654
ENSG00000166402	TUB	543.182564940096	0.289684	0.0791574439202871	3.65959747473068	0.00025261174131677	0.00740464	ENST00000534099+ENST00000305253+ENST00000299506	protein_coding	48.5511
ENSG00000130724	CHMP2A	78.2239098328965	0.447551	0.141458049716794	3.16384582785799	0.00155699249820606	0.0261577	ENST00000312547+ENST00000601220+ENST00000600118+ENST00000600006+ENST00000596708+ENST00000597209+ENST00000600804+ENST00000597848	protein_coding	48.5044
ENSG00000232177	MTND4P24	43.9221157055286	0.8214	0.247116211173563	3.32394225988454	0.00088754569956576	0.0175753	ENST00000424002	pseduogene	48.4184
ENSG00000175662	TOM1L2	410.596642694565	-0.225122	0.0704876193378259	-3.1937793712868	0.00140423392200691	0.0243974	ENST00000581396+ENST00000379504+ENST00000478943+ENST00000318094+ENST00000577794+ENST00000395739+ENST00000535933+ENST00000540946+ENST00000486413+ENST00000542206+ENST00000468944+ENST00000577517+ENST00000537091+ENST00000579586	protein_coding	47.9566
ENSG00000184674	GSTT1	62.13593401686	0.765871	0.256424448910556	2.98673208692387	0.00281976714728012	0.039095	ENST00000248935+ENST00000417831+ENST00000436103+ENST00000417489+ENST00000458231+ENST00000426209+ENST00000439996+ENST00000417870+ENST00000418883+ENST00000480898+ENST00000428175+ENST00000447865+ENST00000486544	protein_coding	47.6557
ENSG00000104613	INTS10	47.86294604639	-0.450507	0.137673670779185	-3.27228146985626	0.0010668330938604	0.0199842	ENST00000397977+ENST00000518424+ENST00000522114+ENST00000520985+ENST00000521758+ENST00000523869+ENST00000522081+ENST00000523846+ENST00000522806+ENST00000523143+ENST00000521357+ENST00000518799+ENST00000519493+ENST00000520670+ENST00000521008+ENST00000523772+ENST00000520827+ENST00000607660+ENST00000517546	protein_coding	47.3605
ENSG00000154582	TCEB1	86.6647266471921	0.346736	0.108132499257102	3.20658250890182	0.00134321779022688	0.0234939	ENST00000602840+ENST00000518127+ENST00000520210+ENST00000520242+ENST00000519487+ENST00000284811+ENST00000522337+ENST00000523815+ENST00000519082	protein_coding	47.2085
ENSG00000255198	SNHG9	20.3378105810427	-0.586596	0.154955582630283	-3.78557702562896	0.000153352323680112	0.00509927	ENST00000531523+ENST00000564014+ENST00000459373	lincRNA	47.1471
ENSG00000227682	ATP5A1P2	21.1417745945029	0.692552	0.170424683685293	4.06368210530917	4.83046033799776e-05	0.00220856	ENST00000412323	pseduogene	47.0603
ENSG00000185046	ANKS1B	212.11606177444	-0.394821	0.093776220488043	-4.21024647932744	2.55092232752795e-05	0.00137427	ENST00000555119+ENST00000341752+ENST00000549558+ENST00000547776+ENST00000551212+ENST00000329257+ENST00000547010+ENST00000549025+ENST00000550693+ENST00000549493+ENST00000547446+ENST00000550778+ENST00000333732+ENST00000547362+ENST00000332712+ENST00000546568+ENST00000546960+ENST00000549315+ENST00000546364+ENST00000552407+ENST00000551613+ENST00000549797+ENST00000551830+ENST00000551560+ENST00000552748…	protein_coding	46.9806
ENSG00000108561	C1QBP	75.781575107983	0.491005	0.134224299968598	3.65808996150504	0.000254101863092498	0.00741985	ENST00000225698+ENST00000574444+ENST00000570805+ENST00000573204+ENST00000573421+ENST00000573406+ENST00000576122	protein_coding	46.95
ENSG00000183837	PNMA3	223.141501476508	-0.344736	0.0842088637060896	-4.0938189486292	4.24325694416518e-05	0.00200607	ENST00000447306+ENST00000370265+ENST00000424805+ENST00000370264	protein_coding	46.5884
ENSG00000119820	YIPF4	1021.96475027736	0.488128	0.158050377162624	3.08842996493669	0.00201217114703923	0.0310065	ENST00000238831+ENST00000495355+ENST00000437765+ENST00000441084	protein_coding	46.49
ENSG00000071051	NCK2	47.8639931302861	0.463439	0.137904970122134	3.36056802386842	0.000777823742020946	0.0161123	ENST00000233154+ENST00000451463+ENST00000393348+ENST00000522586+ENST00000425756+ENST00000393349	protein_coding	46.229
ENSG00000197345	MRPL21	60.3567492302307	0.550079	0.156494991365229	3.51499166237847	0.000439767794832903	0.0107614	ENST00000362034+ENST00000450904+ENST00000565125+ENST00000541279+ENST00000567045+ENST00000544567+ENST00000541265+ENST00000536637	protein_coding	46.1126
ENSG00000159685	CHCHD6	52.4560914946442	0.607231	0.146048297639701	4.15773929923119	3.21412518082813e-05	0.00162753	ENST00000290913+ENST00000503119+ENST00000508789+ENST00000514908+ENST00000513253+ENST00000515867+ENST00000504973+ENST00000510044	protein_coding	45.8204
ENSG00000065000	AP3D1	249.858406613955	-0.219809	0.0695400570216611	-3.1609006775023	0.00157282119831734	0.0262289	ENST00000589223+ENST00000356926+ENST00000355272+ENST00000585652+ENST00000350812+ENST00000345016+ENST00000591650+ENST00000586370+ENST00000589369+ENST00000592488+ENST00000591631+ENST00000586177+ENST00000590683+ENST00000591284	protein_coding	45.6056
ENSG00000143222	UFC1	69.7218421481291	0.464729	0.147032863475565	3.16071757851826	0.00157381013832486	0.0262289	ENST00000467540+ENST00000368003+ENST00000483191+ENST00000473766+ENST00000463735+ENST00000482672	protein_coding	45.5165
ENSG00000124422	USP22	287.580168063211	-0.313582	0.0594878304900306	-5.27136485031774	1.35412981728965e-07	2.13881e-05	ENST00000537526+ENST00000261497+ENST00000455117+ENST00000579645+ENST00000463692+ENST00000478443+ENST00000582335+ENST00000577610+ENST00000578446+ENST00000476111+ENST00000584538	protein_coding	45.4627
ENSG00000090263	MRPS33	47.0469083714395	0.525864	0.129015545154524	4.07597730006955	4.58214890086332e-05	0.00213244	ENST00000393008+ENST00000324787+ENST00000469351+ENST00000484502+ENST00000496958+ENST00000472343+ENST00000467334+ENST00000496641+ENST00000485202	protein_coding	45.3003
ENSG00000176871	WSB2	216.898048199105	0.556145	0.0975654199364545	5.70022608300779	1.19648641249305e-08	3.0797e-06	ENST00000315436+ENST00000542304+ENST00000441406+ENST00000544233+ENST00000543218+ENST00000535496+ENST00000540129+ENST00000543186+ENST00000536738+ENST00000537945+ENST00000536602+ENST00000542726	protein_coding	45.1232
ENSG00000196262	PPIA	121.563034295241	0.380513	0.117041404406259	3.25109435016356	0.00114961699564022	0.0211063	ENST00000468812+ENST00000451562+ENST00000481437+ENST00000479021+ENST00000355968+ENST00000489459+ENST00000415933+ENST00000494484+ENST00000480603	protein_coding	45.0353
ENSG00000134375	TIMM17A	121.973879633772	0.327875	0.108521036640965	3.02130037220292	0.00251691543437951	0.0360406	ENST00000367287+ENST00000478378+ENST00000484647+ENST00000482943	protein_coding	44.9327
ENSG00000213923	CSNK1E	130.575234003042	-0.440304	0.100204047596676	-4.3940702023546	1.11247864187969e-05	0.000741025	ENST00000359867+ENST00000396832+ENST00000400206+ENST00000366216+ENST00000431632+ENST00000495232+ENST00000403904+ENST00000431611+ENST00000494610+ENST00000413574+ENST00000405675+ENST00000498529+ENST00000442216+ENST00000451964+ENST00000467976+ENST00000430335	protein_coding	44.4698
ENSG00000111652	COPS7A	143.686037875685	0.315856	0.0975261905846302	3.23868150079111	0.00120083588793225	0.0217896	ENST00000543155+ENST00000455113+ENST00000542150+ENST00000229251+ENST00000539735+ENST00000543170+ENST00000538410+ENST00000540408+ENST00000537022+ENST00000543939+ENST00000538375+ENST00000544725+ENST00000534947+ENST00000536872+ENST00000546229+ENST00000541866+ENST00000534877+ENST00000543537+ENST00000538753+ENST00000544316+ENST00000542630	protein_coding	44.3093
ENSG00000152556	PFKM	244.942393092106	0.544845	0.106740485261774	5.10438737710525	3.31867844298712e-07	4.60959e-05	ENST00000550345+ENST00000549003+ENST00000550924+ENST00000549941+ENST00000340802+ENST00000550257+ENST00000547581+ENST00000546755+ENST00000549366+ENST00000552792+ENST00000548288+ENST00000359794+ENST00000547066+ENST00000546964+ENST00000548720+ENST00000552989+ENST00000551485+ENST00000551548+ENST00000551339+ENST00000395233+ENST00000548345+ENST00000551804+ENST00000549022+ENST00000312352+ENST00000547587…	protein_coding	44.3003
ENSG00000128335	APOL2	193.757608428436	0.372496	0.104578919653304	3.56186773256436	0.000368225893132999	0.00949059	ENST00000249066+ENST00000358502+ENST00000451256+ENST00000529194+ENST00000454728+ENST00000489186+ENST00000473549+ENST00000484830+ENST00000476579	protein_coding	44.1485
ENSG00000089248	ERP29	98.0844569538708	0.366068	0.124220503885641	2.94692178609393	0.00320954372742482	0.0429498	ENST00000261735+ENST00000455836+ENST00000553161+ENST00000552052+ENST00000546477	protein_coding	44.0964
ENSG00000157870	FAM213B	123.251779879537	-0.332469	0.0881130286468843	-3.77320809525627	0.000161161755832519	0.00525653	ENST00000493183+ENST00000474659+ENST00000419916+ENST00000378424+ENST00000537325+ENST00000378427+ENST00000378425+ENST00000444521+ENST00000465233+ENST00000498083+ENST00000481683+ENST00000484099+ENST00000477045+ENST00000464043+ENST00000476686	protein_coding	44.0823
ENSG00000235449	RP11-480I12.2	9.23460703834161	0.411104	0.0913402820817068	4.50080160679516	6.76976706398184e-06	0.000493507	ENST00000430450	pseduogene	44.0522
ENSG00000134684	YARS	172.827499683141	0.256762	0.0860968615233986	2.98224057641967	0.00286147044890125	0.0394308	ENST00000373477+ENST00000469100+ENST00000490826+ENST00000487404+ENST00000478828+ENST00000481895+ENST00000466052+ENST00000470377+ENST00000472692	protein_coding	43.949
ENSG00000183087	GAS6	146.444537368063	-0.414784	0.107043206172128	-3.8749178483815	0.000106660676405015	0.00383408	ENST00000608763+ENST00000418959+ENST00000450766+ENST00000355761+ENST00000357389+ENST00000480426+ENST00000610073+ENST00000327773+ENST00000476291	protein_coding	43.596
ENSG00000178913	TAF7	141.049227575025	0.38835	0.116334504854677	3.33822156293606	0.000843164874969155	0.0170506	ENST00000313368	protein_coding	43.5266
ENSG00000109339	MAPK10	184.887264418345	0.30057	0.086727304945525	3.46569076324437	0.000528871191002169	0.0121487	ENST00000395169+ENST00000310816+ENST00000359221+ENST00000395157+ENST00000361569+ENST00000449047+ENST00000395166+ENST00000395160+ENST00000508262+ENST00000515400+ENST00000395161+ENST00000489368+ENST00000472236+ENST00000468020+ENST00000479377+ENST00000486985+ENST00000513839+ENST00000430389+ENST00000512017+ENST00000475679+ENST00000512564+ENST00000511167+ENST00000511328+ENST00000509464+ENST00000506773…	protein_coding	43.3497
ENSG00000204071	TCEAL6	62.5583798488778	0.321548	0.111427193757616	2.88571983409513	0.00390519623340223	0.0491053	ENST00000372774+ENST00000372773	protein_coding	42.9515
ENSG00000131368	MRPS25	103.990115135247	0.341379	0.107304917869162	3.18139487693922	0.00146567704180487	0.0252281	ENST00000496484+ENST00000474866+ENST00000253686+ENST00000449354+ENST00000420267+ENST00000444840+ENST00000447299	protein_coding	42.795
ENSG00000129538	RNASE1	49.7660781039766	-0.903896	0.249972539431432	-3.61598081377614	0.000299212538081493	0.00835111	ENST00000397967+ENST00000340900+ENST00000412779+ENST00000555698+ENST00000397970	protein_coding	42.275
ENSG00000225840	AC010970.2	42.5159626871436	-0.679383	0.217878343120484	-3.11817597694811	0.0018197411403704	0.0290896	ENST00000445125	pseduogene	41.9761
ENSG00000263781	RP11-321A17.3	28.0567274114689	0.755727	0.153830173696511	4.91273335084581	8.98153889134895e-07	0.000102056	ENST00000602084+ENST00000580924	pseduogene	41.8078
ENSG00000138663	COPS4	132.993087251103	0.383488	0.112145981403915	3.41954119311827	0.000627268344428037	0.0137703	ENST00000509093+ENST00000264389+ENST00000511891+ENST00000509317+ENST00000510801+ENST00000506443+ENST00000507376+ENST00000503682+ENST00000511653+ENST00000511708+ENST00000504274	protein_coding	41.3074
ENSG00000114279	FGF12	390.238939938855	0.491277	0.0880095355581609	5.58208739329259	2.37648901924028e-08	5.44477e-06	ENST00000445105+ENST00000264730+ENST00000454309+ENST00000440901+ENST00000450716+ENST00000430714+ENST00000448795+ENST00000418610+ENST00000466144+ENST00000491636	protein_coding	41.1809
ENSG00000231434	RP11-144L1.8	122.827998647395	-0.430159	0.129413584534424	-3.32390633616862	0.000887660033709357	0.0175753	ENST00000436135	pseduogene	41.1591
ENSG00000143727	ACP1	115.843260800811	0.564459	0.115862038547353	4.87182186866782	1.10573842260167e-06	0.00011762	ENST00000484125+ENST00000272067+ENST00000272065+ENST00000413140+ENST00000442386+ENST00000407983+ENST00000439645+ENST00000405364+ENST00000405233+ENST00000480874+ENST00000453390+ENST00000484464+ENST00000463831	protein_coding	41.0542
ENSG00000163001	CCDC104	73.7032061743282	0.433755	0.130335694325274	3.32798546752682	0.000874764295381124	0.0174185	ENST00000339012+ENST00000406691+ENST00000349456+ENST00000407816+ENST00000403007+ENST00000490934+ENST00000481791	protein_coding	41.0247
ENSG00000132485	ZRANB2	173.49158424181	-0.334516	0.10148654721832	-3.29615651197103	0.000980173927578549	0.0188059	ENST00000370920+ENST00000477096+ENST00000254821+ENST00000487510+ENST00000479947+ENST00000473260	protein_coding	40.7201
ENSG00000182272	B4GALNT4	67.5322982628665	-0.642655	0.12523876603012	-5.13143527544243	2.87541102417883e-07	4.05064e-05	ENST00000530717+ENST00000329962+ENST00000524443+ENST00000526584+ENST00000534778	protein_coding	40.5943
ENSG00000114631	PODXL2	122.460597957048	-0.533192	0.156439034656913	-3.40830724763763	0.000653672481435721	0.0142259	ENST00000342480	protein_coding	40.1085
ENSG00000090013	BLVRB	50.8714681671746	0.6661	0.159180513822976	4.18455951542457	2.85719585756189e-05	0.00148924	ENST00000263368+ENST00000595483+ENST00000601346+ENST00000597870	protein_coding	39.8434
ENSG00000166352	C11orf74	48.0693883860835	0.461081	0.142257204154199	3.24117853321972	0.00119036607524415	0.0216306	ENST00000334307+ENST00000347206+ENST00000531554+ENST00000534635+ENST00000446510+ENST00000524539+ENST00000530697+ENST00000527108+ENST00000528092+ENST00000532470	protein_coding	39.7165
ENSG00000164182	NDUFAF2	23.7186593035826	0.407385	0.140739218951737	2.89461069240397	0.00379629034364893	0.0481441	ENST00000296597+ENST00000511107+ENST00000502658+ENST00000512623	protein_coding	39.278
ENSG00000133083	DCLK1	314.992357594613	0.352467	0.0813598846237611	4.33219758354955	1.47628363959694e-05	0.000902693	ENST00000360631+ENST00000255448+ENST00000379893+ENST00000477664+ENST00000486239+ENST00000460982+ENST00000379892	protein_coding	38.944
ENSG00000129946	SHC2	68.0222238771914	-0.556278	0.141740063910019	-3.92463479649712	8.68614111408667e-05	0.00329868	ENST00000264554+ENST00000588376+ENST00000587423+ENST00000589922+ENST00000590170+ENST00000590222+ENST00000590113+ENST00000591388	protein_coding	38.8301
ENSG00000156475	PPP2R2B	146.420132807995	0.312442	0.0934758949768106	3.34248880180496	0.000830307054225851	0.016856	ENST00000394413+ENST00000394414+ENST00000508545+ENST00000530902+ENST00000394411+ENST00000394410+ENST00000453001+ENST00000356826+ENST00000504198+ENST00000336640+ENST00000394409+ENST00000512639+ENST00000512984+ENST00000522831+ENST00000528601+ENST00000515880+ENST00000512011+ENST00000532154+ENST00000502876+ENST00000508267+ENST00000504565+ENST00000509721+ENST00000520231	protein_coding	38.7274
ENSG00000181817	LSM10	63.5689923593138	0.486458	0.12617375665612	3.85546366990306	0.00011551048480671	0.00410269	ENST00000476041+ENST00000315732+ENST00000489912	protein_coding	38.3353
ENSG00000100280	AP1B1	202.319650595472	-0.313203	0.100540950153232	-3.11518040477497	0.00183832439650996	0.0292574	ENST00000482818+ENST00000432560+ENST00000356015+ENST00000357586+ENST00000317368+ENST00000405198+ENST00000402502+ENST00000415447+ENST00000472057+ENST00000421126+ENST00000415756+ENST00000473606	protein_coding	37.6425
ENSG00000166171	DPCD	58.0506175488444	0.563828	0.149780055948642	3.76437475963771	0.000166966323547321	0.00539702	ENST00000470165+ENST00000416979+ENST00000370151+ENST00000370147+ENST00000370148+ENST00000434727+ENST00000475443	protein_coding	37.4008
ENSG00000159228	CBR1	61.0092014307587	0.433832	0.145625807052976	2.9790872336424	0.00289108457927356	0.0397338	ENST00000290349+ENST00000530908+ENST00000466328+ENST00000439427+ENST00000399191	protein_coding	37.3356
ENSG00000084623	EIF3I	90.1299435985665	0.551451	0.101568142985867	5.4293653210803	5.65548123243342e-08	1.07312e-05	ENST00000355082+ENST00000373586+ENST00000489353+ENST00000471486+ENST00000483517+ENST00000474371	protein_coding	36.8159
ENSG00000116221	MRPL37	89.2038950430458	0.344608	0.114191577348467	3.01780637664996	0.00254611525902545	0.0363112	ENST00000487096+ENST00000360840+ENST00000605337+ENST00000490670+ENST00000398219+ENST00000336230	protein_coding	36.6509
ENSG00000127948	POR	67.7679284663519	-0.372269	0.107149087343465	-3.47430698548705	0.000512174697650079	0.0119578	ENST00000453773+ENST00000439963+ENST00000461988+ENST00000419840+ENST00000448410+ENST00000471238+ENST00000421059+ENST00000394893+ENST00000412521+ENST00000414186+ENST00000432753+ENST00000449920+ENST00000418341+ENST00000454934+ENST00000412064+ENST00000447222+ENST00000426184+ENST00000475509+ENST00000439297+ENST00000545601+ENST00000450476+ENST00000460892+ENST00000439269+ENST00000496888+ENST00000487247…	protein_coding	36.5214
ENSG00000167654	ATCAY	265.791384108227	-0.359518	0.0930316656404441	-3.86447177741722	0.000111329860824451	0.00398817	ENST00000598136+ENST00000450849+ENST00000301260+ENST00000398448+ENST00000597739+ENST00000595916+ENST00000600960+ENST00000601323	protein_coding	36.3331
ENSG00000146457	WTAP	151.245150227857	0.447327	0.122044159285603	3.66528437201868	0.000247063901096382	0.00729608	ENST00000358372+ENST00000494513+ENST00000337387+ENST00000462110	protein_coding	36.203
ENSG00000243927	MRPS6	70.1523940413207	0.434917	0.137341707296475	3.16667819947863	0.0015419084236421	0.0259671	ENST00000488492+ENST00000399312+ENST00000477091+ENST00000483977+ENST00000482679	protein_coding	36.1684
ENSG00000126756	UXT	29.3529498469937	0.596871	0.177989581842479	3.35340563533214	0.00079823627572819	0.0163321	ENST00000333119+ENST00000485641+ENST00000460840+ENST00000335890+ENST00000376964	protein_coding	35.8078
ENSG00000091640	SPAG7	66.3025026652965	0.416426	0.139226374704755	2.99100198369672	0.00278063686979334	0.0387006	ENST00000575142+ENST00000206020+ENST00000573366+ENST00000575784+ENST00000572148+ENST00000573805+ENST00000571023+ENST00000570341	protein_coding	35.7485
ENSG00000104381	GDAP1	238.624830440295	0.302971	0.0978597749621252	3.09597103984136	0.00196169519771878	0.0304992	ENST00000521096+ENST00000520797+ENST00000220822+ENST00000434412+ENST00000523640+ENST00000522568+ENST00000524366+ENST00000524195	protein_coding	35.7173
ENSG00000115286	NDUFS7	43.5480761336085	0.842725	0.187182056837473	4.50216791181531	6.72638056908577e-06	0.000492064	ENST00000546283+ENST00000233627+ENST00000545446+ENST00000543289+ENST00000539480+ENST00000538662+ENST00000313408+ENST00000436115+ENST00000534853+ENST00000546172+ENST00000414651+ENST00000538929+ENST00000538523+ENST00000540530+ENST00000535382+ENST00000539882+ENST00000591358	protein_coding	35.5968
ENSG00000155097	ATP6V1C1	356.718536567132	0.442673	0.0831913921816297	5.32113350625563	1.03122686586842e-07	1.73387e-05	ENST00000395862+ENST00000518857+ENST00000521514+ENST00000518738+ENST00000521671+ENST00000518959	protein_coding	35.5524
ENSG00000172992	DCAKD	140.640982642836	0.457741	0.116858564326765	3.91705386132064	8.96377269054403e-05	0.00338394	ENST00000452796+ENST00000342350+ENST00000588499+ENST00000593094+ENST00000592902+ENST00000588295+ENST00000310604	protein_coding	35.4276
ENSG00000215900	SEPW1P	15.1934056091152	0.38298	0.12810804233238	2.9895052223608	0.00279429670823453	0.0388648	ENST00000322792	pseduogene	35.0996
ENSG00000057608	GDI2	145.221424973109	0.369343	0.10539470173841	3.50437883036531	0.000457673790538256	0.0110954	ENST00000380191+ENST00000479928+ENST00000447751+ENST00000380132+ENST00000380181+ENST00000456041+ENST00000418688+ENST00000608581+ENST00000380127+ENST00000609712	protein_coding	34.9195
ENSG00000132970	WASF3	253.864631511945	-0.348674	0.0920463134414866	-3.78802330227474	0.000151850610398769	0.00507361	ENST00000361042+ENST00000335327+ENST00000496788	protein_coding	34.8672
ENSG00000154027	AK5	145.535272818241	0.313329	0.108524866374768	2.8871591436777	0.00388737551670856	0.0490011	ENST00000354567+ENST00000317704+ENST00000478407+ENST00000344720+ENST00000469394+ENST00000466114+ENST00000524494+ENST00000465146+ENST00000530826+ENST00000527263+ENST00000478255+ENST00000466393+ENST00000531672	protein_coding	34.8467
ENSG00000003096	KLHL13	195.691217244178	0.281618	0.0961543066294084	2.92881017567641	0.00340262151544805	0.0445891	ENST00000371882+ENST00000545703+ENST00000262820+ENST00000539496+ENST00000540167+ENST00000541812+ENST00000447671+ENST00000371878+ENST00000371876+ENST00000469946+ENST00000453826	protein_coding	34.4762
ENSG00000171148	TADA3	77.1367312572998	-0.334333	0.116195904868	-2.87732492635195	0.00401062389635954	0.0498911	ENST00000301964+ENST00000492103+ENST00000440161+ENST00000343450+ENST00000492635+ENST00000439043	protein_coding	34.4218
ENSG00000172115	CYCS	224.77188049424	0.435141	0.0893938304256965	4.8676854254136	1.12912872265451e-06	0.000118895	ENST00000305786+ENST00000409409+ENST00000409764+ENST00000413447	protein_coding	34.1489
ENSG00000117758	STX12	190.383958127354	0.315089	0.0915879200237575	3.44029161159138	0.000581087726451854	0.0129898	ENST00000373943+ENST00000440806+ENST00000468761+ENST00000481874+ENST00000472285	protein_coding	33.761
ENSG00000074211	PPP2R2C	221.015602986756	-0.394284	0.115641030372926	-3.40955538075021	0.000650688652993117	0.0141758	ENST00000335585+ENST00000506140+ENST00000515571+ENST00000382599+ENST00000507294+ENST00000513943+ENST00000314348+ENST00000509917+ENST00000507028	protein_coding	33.6339
ENSG00000130204	TOMM40	57.6975465104861	-0.520989	0.135492197248018	-3.84515997724361	0.000120473814641453	0.00422144	ENST00000589253+ENST00000405636+ENST00000592434+ENST00000426677+ENST00000589649+ENST00000252487+ENST00000592041	protein_coding	33.6284
ENSG00000064601	CTSA	92.4666181958036	0.364243	0.102271961495812	3.56151805725583	0.000368716744261417	0.00949059	ENST00000606788+ENST00000372484+ENST00000606394+ENST00000354880+ENST00000606066+ENST00000607841+ENST00000191018+ENST00000607814+ENST00000607212+ENST00000372459+ENST00000607482+ENST00000485627+ENST00000606782+ENST00000419493+ENST00000493522+ENST00000480961+ENST00000484855+ENST00000607187+ENST00000606000	protein_coding	33.4513
ENSG00000172336	POP7	57.5612186547959	0.418104	0.13567966150175	3.08155174424361	0.00205924682271103	0.0314254	ENST00000303151+ENST00000457480	protein_coding	33.4391
ENSG00000129187	DCTD	95.8439424269938	-0.374644	0.118853860311475	-3.15214078750889	0.00162078105612276	0.0266922	ENST00000500813+ENST00000357067+ENST00000438320+ENST00000507543+ENST00000507631+ENST00000510370+ENST00000503182+ENST00000510307+ENST00000512766+ENST00000514754+ENST00000513383+ENST00000513348+ENST00000503820+ENST00000509757+ENST00000509218+ENST00000503988+ENST00000508994	protein_coding	33.4264
ENSG00000168490	PHYHIP	155.455446104672	-0.426225	0.126807484410733	-3.36119785557459	0.000776052121987869	0.0160994	ENST00000321613+ENST00000454243+ENST00000523252+ENST00000522869+ENST00000518274	protein_coding	33.3338
ENSG00000109929	SC5D	119.010142518638	0.365366	0.116092702419148	3.14719493014503	0.0016484502466207	0.0269135	ENST00000264027+ENST00000534455+ENST00000531140+ENST00000534230+ENST00000527762+ENST00000524683+ENST00000392789+ENST00000528991+ENST00000527183	protein_coding	33.3211
ENSG00000147419	CCDC25	65.8422011942333	0.45625	0.130577662359967	3.49408729539506	0.000475685449088565	0.0113864	ENST00000520486+ENST00000356537+ENST00000520202+ENST00000523841+ENST00000519509+ENST00000539095+ENST00000522915+ENST00000521220+ENST00000524084+ENST00000519299+ENST00000519843+ENST00000517979	protein_coding	33.1538
ENSG00000213523	SRA1	84.6464268509919	0.442035	0.118088611624385	3.74324444443092	0.000181659349219168	0.00576471	ENST00000602657+ENST00000336283+ENST00000602775+ENST00000523259+ENST00000602875+ENST00000520427	protein_coding	32.7439
ENSG00000143862	ARL8A	71.581876027445	-0.444266	0.12313687717281	-3.60790439968436	0.000308680180674172	0.0085128	ENST00000272217+ENST00000491358+ENST00000486225	protein_coding	32.614
ENSG00000145194	ECE2	152.067513230304	-0.523435	0.141036748680352	-3.7113364559051	0.000206167852242844	0.00636465	ENST00000324557+ENST00000402825+ENST00000359140+ENST00000404464+ENST00000488401+ENST00000357474+ENST00000422932+ENST00000474750+ENST00000430587+ENST00000490579+ENST00000462596	protein_coding	32.4568
ENSG00000133048	CHI3L1	49.5973329514387	-0.910468	0.270938331277371	-3.36042692091515	0.000778221157425574	0.0161123	ENST00000255409+ENST00000473185+ENST00000404436+ENST00000478742+ENST00000472064	protein_coding	32.4311
ENSG00000124164	VAPB	241.614046939842	0.353021	0.0748130120663348	4.718705460377	2.37350174258569e-06	0.000213598	ENST00000475243+ENST00000395802+ENST00000520497+ENST00000265619+ENST00000463370+ENST00000476395	protein_coding	32.4165
ENSG00000172974	AC007318.5	14.603960322742	1.09446	0.24127994873124	4.53606624627568	5.73131841692327e-06	0.000440931	ENST00000393177+ENST00000467568	pseduogene	32.2801
ENSG00000100994	PYGB	208.306787973276	-0.361388	0.0918715970011239	-3.93362049530836	8.36758617640243e-05	0.00322823	ENST00000216962+ENST00000428458+ENST00000471359	protein_coding	32.2753
ENSG00000075043	KCNQ2	76.5720350094535	-0.720908	0.152814269871778	-4.71754443082978	2.38708280089391e-06	0.000213598	ENST00000359689+ENST00000354587+ENST00000359125+ENST00000357249+ENST00000360480+ENST00000370224+ENST00000344462+ENST00000370221+ENST00000482957+ENST00000344425	protein_coding	32.1902
ENSG00000060982	BCAT1	455.355326162997	0.222889	0.0699420871409634	3.18677019060638	0.00143871038779088	0.024872	ENST00000261192+ENST00000538118+ENST00000342945+ENST00000539282+ENST00000543099+ENST00000539780+ENST00000544418+ENST00000546285+ENST00000355164	protein_coding	32.1774
ENSG00000198171	DDRGK1	38.1520861042289	0.473317	0.160672300081842	2.94585323293946	0.00322065177836136	0.0430156	ENST00000354488+ENST00000496781+ENST00000470203+ENST00000380201	protein_coding	32.1586
ENSG00000124313	IQSEC2	51.4611272729687	-0.400757	0.134830972745204	-2.97229463525936	0.00295582879112853	0.0405435	ENST00000396435+ENST00000375368+ENST00000375365+ENST00000498281+ENST00000462054+ENST00000485377	protein_coding	32.0915
ENSG00000149187	CELF1	90.3565277288317	-0.353025	0.116050787589238	-3.04198802646193	0.0023502124293577	0.0342883	ENST00000395290+ENST00000358597+ENST00000395292+ENST00000310513+ENST00000361904+ENST00000539455+ENST00000531165+ENST00000532048+ENST00000524648+ENST00000539254+ENST00000534614+ENST00000422993+ENST00000532146+ENST00000530151+ENST00000525841+ENST00000528434+ENST00000543178+ENST00000535982+ENST00000526419+ENST00000528538+ENST00000526277	protein_coding	32.0433
ENSG00000122012	SV2C	441.611735696074	0.472897	0.105873506069503	4.46662342259635	7.94638259411317e-06	0.00055971	ENST00000502798+ENST00000322285+ENST00000506257	protein_coding	32.0193
ENSG00000159840	ZYX	92.7398271260101	-0.491625	0.122427084927449	-4.01565715136229	5.92803815626115e-05	0.00256951	ENST00000322764+ENST00000449630+ENST00000468083+ENST00000457235+ENST00000449423+ENST00000354434+ENST00000392910+ENST00000477373+ENST00000436448+ENST00000446634+ENST00000497119	protein_coding	31.8648
ENSG00000167615	LENG8	27.9913016935736	-1.15843	0.227617710386098	-5.08935278486484	3.59287656538616e-07	4.7712e-05	ENST00000326764+ENST00000439657+ENST00000376514+ENST00000376526+ENST00000436479+ENST00000443957+ENST00000431846+ENST00000462541+ENST00000421200	protein_coding	31.7931
ENSG00000013297	CLDN11	99.7916304106795	-0.530812	0.174609499247343	-3.0399952934969	0.00236581845655997	0.0344448	ENST00000064724+ENST00000486975+ENST00000486429+ENST00000451576+ENST00000489485+ENST00000468358+ENST00000471373+ENST00000477531+ENST00000480067+ENST00000488989	protein_coding	31.791
ENSG00000260318	COX6CP1	13.0861034513291	0.478334	0.137227833813604	3.48569126709375	0.000490867167034589	0.0116296	ENST00000564972	pseduogene	31.3537
ENSG00000164880	INTS1	133.995783912819	-0.496615	0.129986495900158	-3.82051106147177	0.000133175431920955	0.00456673	ENST00000389470+ENST00000404767+ENST00000493446+ENST00000483196+ENST00000479671+ENST00000482994+ENST00000468115+ENST00000496988+ENST00000493531	protein_coding	31.3014
ENSG00000105520	DKFZP761J1410	128.891037338275	-0.491234	0.101775060470165	-4.82666782786627	1.38836400608307e-06	0.000139836	ENST00000251473+ENST00000591329+ENST00000586431+ENST00000586380+ENST00000591608+ENST00000588196+ENST00000587801+ENST00000588360	protein_coding	31.2415
ENSG00000219438	FAM19A5	131.795010093147	-0.37194	0.108981383613676	-3.41287826071203	0.000642806503964803	0.0140358	ENST00000402357+ENST00000336769+ENST00000358295+ENST00000473898+ENST00000406880	protein_coding	31.2033
ENSG00000178947	LINC00086	223.110827565424	-0.622374	0.0857716805543674	-7.25617127976384	3.98200798593986e-13	5.93006e-10	ENST00000417443	lincRNA	31.0675
ENSG00000152642	GPD1L	163.883589224673	-0.343857	0.105874820539502	-3.24776910748113	0.00116313615253411	0.0213095	ENST00000429432+ENST00000282541+ENST00000425459+ENST00000431009+ENST00000428684+ENST00000474846+ENST00000496151	protein_coding	30.9662
ENSG00000228834	RP11-249L21.4	12.4668129547583	0.630138	0.14121782556147	4.46217093087152	8.11334649797091e-06	0.000563851	ENST00000447543	pseduogene	30.8861
ENSG00000177239	MAN1B1	79.7710710860371	-0.409399	0.128642222223729	-3.18246349391501	0.00146027923374466	0.0251615	ENST00000371589+ENST00000544448+ENST00000535144+ENST00000371587+ENST00000545539+ENST00000542372+ENST00000545096+ENST00000540346+ENST00000474902+ENST00000536349+ENST00000540391+ENST00000535028+ENST00000480100+ENST00000536268+ENST00000475449+ENST00000550113	protein_coding	30.8434
ENSG00000101079	NDRG3	154.932597090024	0.305196	0.101532999738655	3.00587695372376	0.00264816134554916	0.0373809	ENST00000349004+ENST00000359675+ENST00000373803+ENST00000373773+ENST00000540765+ENST00000422536	protein_coding	30.4542
ENSG00000130175	PRKCSH	46.9049001665104	-0.475396	0.150599405039225	-3.15669097270726	0.00159570358670462	0.0264038	ENST00000591462+ENST00000591946+ENST00000412601+ENST00000252455+ENST00000589126+ENST00000588269+ENST00000587509+ENST00000593104+ENST00000593053+ENST00000592741+ENST00000593101+ENST00000587327+ENST00000589838+ENST00000589990+ENST00000585325+ENST00000592445+ENST00000585540+ENST00000586486+ENST00000587290+ENST00000590098+ENST00000592435+ENST00000591510	protein_coding	30.3525
ENSG00000084444	KIAA1467	160.077989610907	0.417929	0.121788445675795	3.43159685310159	0.000600038825956584	0.0132946	ENST00000197268+ENST00000416494+ENST00000537625+ENST00000535974+ENST00000541950+ENST00000540455	protein_coding	30.222
ENSG00000171202	TMEM126A	34.2770367944351	0.608206	0.17391062230717	3.49723589288318	0.00047010594063208	0.0113016	ENST00000525353+ENST00000528105+ENST00000531366+ENST00000304511+ENST00000532180+ENST00000528531	protein_coding	30.1853
ENSG00000130522	JUND	85.2253429820212	-0.445943	0.112150116949246	-3.976307789986	6.99935225252807e-05	0.00285768	ENST00000252818+ENST00000600972	protein_coding	30.1303
ENSG00000102172	SMS	58.2500437315763	0.470723	0.126302347707495	3.72695056187326	0.000193810455775601	0.00608547	ENST00000404933+ENST00000379404+ENST00000415881+ENST00000478094+ENST00000457085	protein_coding	29.9221
ENSG00000125445	MRPS7	60.3134693207164	0.560779	0.154599252014318	3.62730452340342	0.000286395446310591	0.00809087	ENST00000245539+ENST00000579761+ENST00000579002+ENST00000583407+ENST00000577767+ENST00000581993+ENST00000584678	protein_coding	29.8889
ENSG00000114354	TFG	105.476002016795	0.444249	0.123525757440626	3.59640400499548	0.000322646572035321	0.00875217	ENST00000418917+ENST00000490574+ENST00000240851+ENST00000479672+ENST00000476228+ENST00000463568+ENST00000487505+ENST00000481203	protein_coding	29.8335
ENSG00000079785	DDX1	149.54379962563	0.311635	0.0881098845377487	3.5368930420632	0.000404863590249254	0.0101576	ENST00000381341+ENST00000434671+ENST00000233084+ENST00000459706+ENST00000470674+ENST00000478695	protein_coding	29.5911
ENSG00000259623	RP11-156E6.1	137.23313780259	-0.336734	0.114686660219096	-2.9361200386682	0.00332345688813588	0.0440221	ENST00000560400	sense_overlapping	29.5555
ENSG00000126254	RBM42	42.9713579167687	-0.40878	0.123946454600221	-3.29803759947517	0.000973630959131471	0.0188059	ENST00000588161+ENST00000262633+ENST00000592202+ENST00000586618+ENST00000589559+ENST00000360475+ENST00000592526+ENST00000589871	protein_coding	29.5531
ENSG00000185615	PDIA2	23.6857445319839	-0.847067	0.210973012253888	-4.01504697588398	5.94339558871323e-05	0.00257083	ENST00000219406+ENST00000467212+ENST00000404312+ENST00000456379+ENST00000482665+ENST00000462950+ENST00000435833	protein_coding	29.4838
ENSG00000134056	MRPS36	57.1369234654692	0.427895	0.132537959495951	3.22846980947567	0.0012445439479196	0.0222534	ENST00000256441+ENST00000507022+ENST00000602380+ENST00000512880+ENST00000503793	protein_coding	29.3705
ENSG00000170445	HARS	68.6335684331607	0.638318	0.156310963092129	4.08364378265806	4.43349759777619e-05	0.00208151	ENST00000504156+ENST00000431330+ENST00000457527+ENST00000448240+ENST00000307633+ENST00000504366+ENST00000438307+ENST00000509087+ENST00000415192+ENST00000506579+ENST00000507746+ENST00000512396+ENST00000518126+ENST00000502888	protein_coding	29.2888
ENSG00000148335	NTMT1	59.7655317888836	0.581811	0.1371908301717	4.2408902927955	2.22634941674037e-05	0.00125114	ENST00000372486+ENST00000372483+ENST00000481189+ENST00000459968+ENST00000372481+ENST00000372480+ENST00000486391+ENST00000482347	protein_coding	29.2748
ENSG00000177542	SLC25A22	126.617634645934	-0.447282	0.120466634417386	-3.71291443476218	0.000204886171348571	0.00633779	ENST00000320230+ENST00000531214+ENST00000481290+ENST00000531437+ENST00000529351+ENST00000533385+ENST00000526152+ENST00000528606+ENST00000527734+ENST00000527723+ENST00000531514+ENST00000528936+ENST00000456706+ENST00000532484+ENST00000524891+ENST00000529066+ENST00000531534+ENST00000532361+ENST00000527127+ENST00000525010+ENST00000532459+ENST00000525644+ENST00000530360	protein_coding	29.217
ENSG00000119335	SET	93.9348565348931	0.510557	0.127608487506475	4.00096315966792	6.30851799218883e-05	0.00265174	ENST00000454747+ENST00000372692+ENST00000409104+ENST00000322030+ENST00000372688+ENST00000372686+ENST00000466009+ENST00000477806+ENST00000480217+ENST00000480536+ENST00000485056	protein_coding	29.0259
ENSG00000112659	CUL9	26.7056759995799	-0.514183	0.147627440578371	-3.4829804136662	0.000495864641692873	0.0117214	ENST00000252050+ENST00000354495+ENST00000515773+ENST00000451399+ENST00000372647+ENST00000510282+ENST00000515344+ENST00000512408+ENST00000504485+ENST00000502719+ENST00000505172+ENST00000502937+ENST00000513904+ENST00000508656+ENST00000506830+ENST00000512423+ENST00000503766+ENST00000505405+ENST00000504647	protein_coding	28.9793
ENSG00000109046	WSB1	152.030409086956	-0.509093	0.149943600330388	-3.39523241740661	0.000685703643955892	0.0147841	ENST00000581440+ENST00000262394+ENST00000578312+ENST00000583742+ENST00000467843+ENST00000579733+ENST00000583193+ENST00000427287+ENST00000581185+ENST00000584354+ENST00000583786+ENST00000581089+ENST00000348811+ENST00000582208+ENST00000584114+ENST00000487603+ENST00000583096	protein_coding	28.8618
ENSG00000174238	PITPNA	177.203772055971	0.350391	0.0960674672641702	3.6473434273708	0.000264965672076295	0.00765134	ENST00000313486+ENST00000539476+ENST00000575288+ENST00000574991+ENST00000576722+ENST00000575895+ENST00000576761+ENST00000576010+ENST00000572004+ENST00000573231+ENST00000573056	protein_coding	28.7904
ENSG00000010810	FYN	93.9996743643813	-0.301207	0.0956111429339778	-3.15032979351118	0.00163086252610075	0.026731	ENST00000354650+ENST00000368682+ENST00000368667+ENST00000229471+ENST00000368678+ENST00000538466+ENST00000356013+ENST00000229470+ENST00000491885+ENST00000467921+ENST00000471959+ENST00000496864+ENST00000476769+ENST00000495935+ENST00000467899+ENST00000495927+ENST00000523322+ENST00000462856+ENST00000520518+ENST00000517419+ENST00000518295+ENST00000523238+ENST00000524310+ENST00000523574+ENST00000518630…	protein_coding	28.7522
ENSG00000107295	SH3GL2	147.126912016432	0.440432	0.130788746705323	3.36750750004165	0.000758509632592664	0.0158589	ENST00000467085+ENST00000380607+ENST00000537391	protein_coding	28.7453
ENSG00000165410	CFL2	153.752162491897	0.442658	0.113137264652944	3.91257297123012	9.13179315138243e-05	0.00342426	ENST00000298159+ENST00000341223+ENST00000554470+ENST00000422678+ENST00000555765+ENST00000556161	protein_coding	28.5955
ENSG00000184867	ARMCX2	138.991155681985	0.330574	0.0977799205563185	3.38079752435256	0.00072275780229497	0.0153606	ENST00000328766+ENST00000330154+ENST00000356824+ENST00000413506+ENST00000433318+ENST00000440675+ENST00000458024+ENST00000467416+ENST00000431597+ENST00000479333+ENST00000496581+ENST00000488982+ENST00000475854	protein_coding	28.5281
ENSG00000163531	NFASC	380.407107683209	-0.226127	0.0714328378274376	-3.16558584393552	0.00154770985573032	0.0260437	ENST00000404977+ENST00000367169+ENST00000360049+ENST00000539706+ENST00000338586+ENST00000339876+ENST00000338515+ENST00000367170+ENST00000367171+ENST00000367172+ENST00000446412+ENST00000403080+ENST00000493914+ENST00000404076+ENST00000514644+ENST00000401399+ENST00000505079+ENST00000404907+ENST00000504476+ENST00000513543+ENST00000430393+ENST00000367173+ENST00000504149+ENST00000512826+ENST00000471392…	protein_coding	28.4522
ENSG00000048162	NOP16	28.5108360613613	0.943331	0.162095720827481	5.81959072979592	5.89918951879961e-09	1.92175e-06	ENST00000389158+ENST00000510123+ENST00000507413+ENST00000502663+ENST00000503849+ENST00000504821+ENST00000509257+ENST00000502577+ENST00000510608	protein_coding	28.4446
ENSG00000115484	CCT4	47.3501946940673	0.792748	0.157643531922632	5.02874057297735	4.93711816107212e-07	6.23425e-05	ENST00000394440+ENST00000461540+ENST00000544079+ENST00000544185+ENST00000538252+ENST00000461370	protein_coding	28.2834
ENSG00000013561	RNF14	137.729286606294	0.406088	0.103911685616077	3.90801099732158	9.3059071427622e-05	0.00345229	ENST00000511961+ENST00000506822+ENST00000513019+ENST00000356143+ENST00000394520+ENST00000347642+ENST00000540015+ENST00000514620+ENST00000502341+ENST00000506938+ENST00000394514+ENST00000512565+ENST00000394515+ENST00000515613+ENST00000507163+ENST00000394519+ENST00000506004+ENST00000507291	protein_coding	28.123
ENSG00000139910	NOVA1	143.547628151266	-0.271389	0.0888030253220323	-3.05608267231565	0.00224249414755214	0.0330883	ENST00000483536+ENST00000465357+ENST00000539517+ENST00000267422+ENST00000449198+ENST00000347476+ENST00000546546+ENST00000549146+ENST00000549571+ENST00000344429+ENST00000547619+ENST00000574031+ENST00000547415+ENST00000551754	protein_coding	28.082
ENSG00000178162	FAR2P2	7.70767700045297	-0.632401	0.159466746663834	-3.96572322945679	7.31737323057576e-05	0.0029395	ENST00000424873+ENST00000449066+ENST00000430785+ENST00000423905+ENST00000433703+ENST00000413041+ENST00000438056+ENST00000415406	uncertain	28.0107
ENSG00000131016	AKAP12	433.301377189479	0.336907	0.0817006430277241	4.12367382862928	3.72876818724668e-05	0.00184658	ENST00000402676+ENST00000253332+ENST00000354675+ENST00000359755+ENST00000490177	protein_coding	27.9665
ENSG00000124399	RP11-663P9.2	16.7657055868976	0.712824	0.117763850546466	6.0529932850864	1.42178796465524e-09	6.1756e-07	ENST00000244249+ENST00000513465	pseduogene	27.9301
ENSG00000140403	DNAJA4	113.090312727114	0.514085	0.125247971707076	4.10453907401548	4.05121796817238e-05	0.00195067	ENST00000394855+ENST00000489435+ENST00000440911+ENST00000343789+ENST00000483802+ENST00000423642+ENST00000394852+ENST00000542636+ENST00000446172+ENST00000485075+ENST00000493321+ENST00000480425	protein_coding	27.8829
ENSG00000126091	ST3GAL3	66.9605422961914	-0.433564	0.134096175294545	-3.23323199363443	0.001223981212225	0.0219611	ENST00000532911+ENST00000489897+ENST00000372377+ENST00000335430+ENST00000330208+ENST00000545417+ENST00000353126+ENST00000372374+ENST00000351035+ENST00000372375+ENST00000262915+ENST00000361400+ENST00000361392+ENST00000530154+ENST00000479383+ENST00000347631+ENST00000484868+ENST00000461066+ENST00000531816+ENST00000332628+ENST00000530581+ENST00000533997+ENST00000533212+ENST00000533933+ENST00000531993…	protein_coding	27.8509
ENSG00000228594	C1orf233	83.3006430643574	-0.600654	0.141833381473602	-4.23492968386547	2.28623233717223e-05	0.0012706	ENST00000422725	protein_coding	27.7324
ENSG00000089289	IGBP1	77.9636023783629	0.439802	0.132884859854947	3.30964502125995	0.000934143600377056	0.018253	ENST00000342206+ENST00000356413	protein_coding	27.649
ENSG00000079999	KEAP1	66.8220732005673	-0.380815	0.123481220393494	-3.08399107603057	0.00204243721862211	0.0312419	ENST00000171111+ENST00000592478+ENST00000393623+ENST00000590237+ENST00000590593+ENST00000588024+ENST00000585845+ENST00000592055+ENST00000591419+ENST00000591039	protein_coding	27.6311
ENSG00000206418	RAB12	113.098205919712	0.457684	0.139388064100726	3.28352530575072	0.00102517440324474	0.0194131	ENST00000329286+ENST00000580987	protein_coding	27.5851
ENSG00000001497	LAS1L	44.3381228928321	-0.547125	0.167344359550778	-3.26945343054071	0.00107755473108443	0.0200625	ENST00000374811+ENST00000374807+ENST00000312391+ENST00000484069+ENST00000374804+ENST00000469091	protein_coding	27.4885
ENSG00000168481	LGI3	132.833490651637	-0.385265	0.111023166657719	-3.47012833241999	0.000520209747446195	0.0120509	ENST00000306317+ENST00000520124+ENST00000424267+ENST00000517694+ENST00000518365	protein_coding	27.4366
ENSG00000051620	HEBP2	42.7847981313865	0.505032	0.128510994964159	3.92987142031407	8.49912980630996e-05	0.00326332	ENST00000448741+ENST00000607197+ENST00000367697+ENST00000453452	protein_coding	27.2604
ENSG00000108272	DHRS11	37.2307948648324	-0.540168	0.187588150341539	-2.8795444076513	0.00398250207389128	0.0498019	ENST00000251312+ENST00000590554+ENST00000590527+ENST00000394445+ENST00000491046+ENST00000593204+ENST00000585376+ENST00000586848	protein_coding	27.2104
ENSG00000224201	PNMA6A	1.97700658205108	-1.12058	0.257682155129746	-4.34869419557611	1.36950518686776e-05	0.000852323	ENST00000535416+ENST00000453825	protein_coding	27.1197
ENSG00000255823	MTRNR2L8	79.4583536272902	1.28684	0.224808147047391	5.7241873365546	1.03930018707283e-08	2.88912e-06	ENST00000536684	protein_coding	26.7255
ENSG00000128590	DNAJB9	125.888847894854	0.363684	0.110581232240975	3.28883675017188	0.00100602356690393	0.0192251	ENST00000249356+ENST00000491582+ENST00000465725	protein_coding	26.691
ENSG00000139182	CLSTN3	125.803474708338	-0.401982	0.121376340678758	-3.31186433421056	0.000926764768315922	0.0181428	ENST00000541953+ENST00000266546+ENST00000545663+ENST00000535452+ENST00000534830+ENST00000539982+ENST00000537408+ENST00000538933+ENST00000541667+ENST00000540931+ENST00000535668+ENST00000544584+ENST00000541770+ENST00000542663+ENST00000331148+ENST00000535313	protein_coding	26.5585
ENSG00000270170	NCBP2-AS2	49.680962215831	0.562642	0.177101394924148	3.17694677905356	0.001488343459237	0.0253724	ENST00000602845	lincRNA	26.5173
ENSG00000108001	EBF3	184.14064999319	-0.325942	0.0972069374665675	-3.35307214309642	0.000799198721798364	0.0163358	ENST00000368648+ENST00000355311+ENST00000440978	protein_coding	26.4583
ENSG00000157837	SPPL3	173.559845110621	-0.298546	0.0941073627621443	-3.1723928004129	0.00151188364308123	0.0256094	ENST00000353487+ENST00000392495+ENST00000545209+ENST00000536996+ENST00000543608+ENST00000543854+ENST00000543181+ENST00000534966+ENST00000540091	protein_coding	26.4528
ENSG00000117016	RIMS3	305.643193746615	-0.321454	0.0848210966715103	-3.78978388490353	0.000150778407598761	0.00505399	ENST00000372684+ENST00000372683	protein_coding	26.3541
ENSG00000007541	PIGQ	98.8236608186876	-0.756711	0.156482935838384	-4.83573827341008	1.32652367763469e-06	0.000134911	ENST00000293874+ENST00000409527+ENST00000409439+ENST00000422307+ENST00000321878+ENST00000439574+ENST00000026218+ENST00000470411+ENST00000443147+ENST00000544860+ENST00000537901+ENST00000420990+ENST00000480424+ENST00000540241+ENST00000476438+ENST00000540548	protein_coding	26.3066
ENSG00000101444	AHCY	97.8366178278974	0.385008	0.117924083043235	3.2648829179939	0.00109509332397259	0.0203309	ENST00000217426+ENST00000538132+ENST00000480653+ENST00000468908+ENST00000606061+ENST00000473516	protein_coding	26.2088
ENSG00000086598	TMED2	119.384592621476	0.390477	0.0974405139986803	4.00733648636249	6.1407346981767e-05	0.00261663	ENST00000262225+ENST00000438031+ENST00000543425+ENST00000544188+ENST00000509052	protein_coding	26.2076
ENSG00000164091	WDR82	164.58860954527	-0.413813	0.08840798223113	-4.68071933097407	2.85870087698659e-06	0.000246083	ENST00000296490+ENST00000487402+ENST00000469000+ENST00000463624	protein_coding	26.1762
ENSG00000170606	HSPA4	207.576507532762	0.382258	0.0911171978170938	4.19522899710807	2.72596038844735e-05	0.00143158	ENST00000304858+ENST00000504328+ENST00000514825	protein_coding	26.1486
ENSG00000123545	NDUFAF4	96.6982960391134	0.347964	0.112370014317196	3.0965879291324	0.00195761793835876	0.0304614	ENST00000316149+ENST00000478382+ENST00000489477	protein_coding	26.0879
ENSG00000167118	URM1	55.691494546262	-0.465128	0.141579162497914	-3.28528677231983	0.00101878621679769	0.0193544	ENST00000452446+ENST00000372853+ENST00000372850+ENST00000470840+ENST00000372847+ENST00000483206	protein_coding	25.9851
ENSG00000059122	FLYWCH1	156.898845586974	-0.412775	0.104336012055759	-3.95621239698976	7.61474641856554e-05	0.00301252	ENST00000253928+ENST00000399667+ENST00000571140+ENST00000416288+ENST00000570425+ENST00000573525+ENST00000570759+ENST00000573564+ENST00000344592+ENST00000571580+ENST00000575604+ENST00000570752+ENST00000574985+ENST00000571983+ENST00000575679	protein_coding	25.9078
ENSG00000171735	CAMTA1	167.988565505645	-0.290218	0.0829248643756672	-3.49977024130477	0.000465659332223812	0.0112367	ENST00000303635+ENST00000490738+ENST00000476163+ENST00000473578+ENST00000557126+ENST00000467404+ENST00000439411+ENST00000461311+ENST00000486138+ENST00000482934+ENST00000495233+ENST00000490905+ENST00000476864+ENST00000470648+ENST00000461580+ENST00000472283+ENST00000467267	protein_coding	25.8815
ENSG00000160445	ZER1	176.794740195191	-0.392796	0.108262175181913	-3.62819377274677	0.000285411019002749	0.00807825	ENST00000291900+ENST00000494461+ENST00000414921+ENST00000427848	protein_coding	25.8147
ENSG00000060237	WNK1	368.837222388792	-0.288189	0.0787621596281603	-3.65897523853189	0.000253225803112616	0.00740464	ENST00000535572+ENST00000537687+ENST00000315939+ENST00000447667+ENST00000530271+ENST00000540360+ENST00000538787+ENST00000340908+ENST00000544965+ENST00000545285+ENST00000535698+ENST00000574679+ENST00000542543+ENST00000545055+ENST00000534872+ENST00000542424+ENST00000537603+ENST00000544559+ENST00000543065+ENST00000540885+ENST00000574564	protein_coding	25.8116
ENSG00000140400	MAN2C1	34.8924663191524	-0.662326	0.166679175524306	-3.97365658994674	7.07775893224132e-05	0.00287932	ENST00000267978+ENST00000563622+ENST00000565683+ENST00000569482+ENST00000564929+ENST00000562067+ENST00000561693+ENST00000566099+ENST00000566569+ENST00000563528+ENST00000567163+ENST00000564570+ENST00000564785+ENST00000567360+ENST00000563441+ENST00000563368+ENST00000569176+ENST00000566013+ENST00000563794+ENST00000565953+ENST00000563596+ENST00000566634+ENST00000562461+ENST00000562228+ENST00000563058…	protein_coding	25.7986
ENSG00000070413	DGCR2	175.510544315111	-0.441972	0.103591435308014	-4.26648881257555	1.98573447605947e-05	0.00114136	ENST00000537045+ENST00000263196+ENST00000389262+ENST00000545799+ENST00000467659+ENST00000608548+ENST00000473832	protein_coding	25.7842
ENSG00000178498	DTX3	71.3100475088727	-0.492334	0.123041677346616	-4.0013596283359	6.2979552840526e-05	0.00265174	ENST00000548804+ENST00000551835+ENST00000550596+ENST00000549583+ENST00000337737+ENST00000548198+ENST00000551632+ENST00000548478+ENST00000550300	protein_coding	25.6761
ENSG00000169189	NSMCE1	50.6773859165681	0.434852	0.140475251074114	3.09558053637524	0.0019642802136791	0.0305166	ENST00000361439+ENST00000569236+ENST00000565070+ENST00000565384+ENST00000562039+ENST00000566087+ENST00000563273+ENST00000564342+ENST00000563900+ENST00000561960+ENST00000567710+ENST00000563512+ENST00000565626+ENST00000567375	protein_coding	25.6292
ENSG00000118518	RNF146	76.5739658392584	-0.441025	0.111628488851254	-3.95082859215686	7.78810895243243e-05	0.0030579	ENST00000368314+ENST00000476956+ENST00000609447+ENST00000356799+ENST00000495188+ENST00000477776+ENST00000609944+ENST00000309649+ENST00000608991+ENST00000610153+ENST00000489534+ENST00000610162+ENST00000608340+ENST00000480444	protein_coding	25.4388
ENSG00000267809	NDUFV2P1	36.0012732261973	0.918302	0.139571589501339	6.57943283198014	4.72246181613177e-11	4.28081e-08	ENST00000596415	pseduogene	25.3179
ENSG00000115392	FANCL	43.612614233454	-0.455158	0.133757588967479	-3.4028545261666	0.000666857764699923	0.0144676	ENST00000403295+ENST00000402135+ENST00000233741+ENST00000403676+ENST00000449070+ENST00000446381+ENST00000470506+ENST00000427708+ENST00000540646+ENST00000417361+ENST00000481670	protein_coding	25.2595
ENSG00000260006	RP11-469M7.1	124.773478434156	0.544478	0.122485834888905	4.44523205531018	8.77970458122037e-06	0.000604119	ENST00000568571	lincRNA	25.221
ENSG00000185222	WBP5	55.9692897183153	0.512855	0.142376096336625	3.60211632533644	0.000315637056296193	0.00865505	ENST00000372661+ENST00000372656	protein_coding	25.2166
ENSG00000125037	EMC3	119.658299058585	0.47709	0.103351145643249	4.61620727895104	3.90816614506077e-06	0.000318287	ENST00000245046+ENST00000487465+ENST00000497557+ENST00000429759+ENST00000470827	protein_coding	25.1704
ENSG00000236764	COX7A2P2	13.5912438828277	0.764938	0.125963670322074	6.0726856819104	1.25788517698391e-09	5.57993e-07	ENST00000505291	pseduogene	25.1644
ENSG00000124733	MEA1	42.14020662323	0.515873	0.170790511590416	3.02050141889879	0.00252356525748928	0.0361111	ENST00000244711	protein_coding	25.1158
ENSG00000197885	NKIRAS1	96.5173779987174	0.650043	0.117468935524449	5.53374724662321	3.13460591598876e-08	6.73746e-06	ENST00000388759+ENST00000443659+ENST00000421515+ENST00000425478+ENST00000437230+ENST00000412028+ENST00000415901+ENST00000416026	protein_coding	25.112
ENSG00000127511	SIN3B	191.328641541621	-0.439457	0.0914637415753437	-4.80471417951156	1.54972728326941e-06	0.000153129	ENST00000248054+ENST00000379803+ENST00000596802+ENST00000596638+ENST00000599880+ENST00000595541+ENST00000594372+ENST00000595900+ENST00000602204+ENST00000595049+ENST00000601141+ENST00000594235	protein_coding	25.08
ENSG00000206417	H1FX-AS1	15.9418075993962	-0.900595	0.209578277212073	-4.29717930316222	1.72985265873494e-05	0.00101913	ENST00000511998+ENST00000383461+ENST00000537780+ENST00000502789+ENST00000433902	antisense	25.0127
ENSG00000181222	POLR2A	233.727929025119	-0.458897	0.11904904893851	-3.85469155773258	0.000115875625377319	0.00410866	ENST00000322644+ENST00000572844+ENST00000576952+ENST00000575547+ENST00000576114+ENST00000576718+ENST00000574158+ENST00000573603+ENST00000576553	protein_coding	24.8746
ENSG00000259494	MRPL46	19.5468712285101	0.509912	0.162658438267845	3.13486631089923	0.00171932446424807	0.0278309	ENST00000312475+ENST00000558660+ENST00000559538+ENST00000560703+ENST00000558531	protein_coding	24.8187
ENSG00000151150	ANK3	219.05117201134	-0.334096	0.0782178329890951	-4.27135776287775	1.94286429614419e-05	0.00112207	ENST00000280772+ENST00000373827+ENST00000373820+ENST00000355288+ENST00000502769+ENST00000489505+ENST00000480699+ENST00000503366+ENST00000469721+ENST00000514197+ENST00000511043+ENST00000459732+ENST00000508449+ENST00000465749+ENST00000467420+ENST00000373815+ENST00000513049+ENST00000506635+ENST00000474360+ENST00000460468+ENST00000486349+ENST00000503925+ENST00000510382	protein_coding	24.8069
ENSG00000065911	MTHFD2	80.9204674008854	0.583034	0.157878639494143	3.69292594408327	0.000221688596105409	0.00666953	ENST00000394053+ENST00000409804+ENST00000264090+ENST00000470592+ENST00000394050+ENST00000489041+ENST00000477455+ENST00000409601+ENST00000488086+ENST00000462026	protein_coding	24.5705
ENSG00000138670	RASGEF1B	152.041203074693	0.716251	0.123265456969859	5.81063965947606	6.22345896151834e-09	1.96595e-06	ENST00000509081+ENST00000264400+ENST00000335927+ENST00000504863+ENST00000436139+ENST00000514889+ENST00000507538+ENST00000512716	protein_coding	24.5624
ENSG00000132463	GRSF1	243.187085859444	0.253883	0.0804812852209176	3.15456200360917	0.00160739218921683	0.0265551	ENST00000254799+ENST00000439371+ENST00000505068+ENST00000499044+ENST00000502323+ENST00000545193+ENST00000514161+ENST00000506453+ENST00000508091	protein_coding	24.5013
ENSG00000105953	OGDH	157.033783378333	-0.479018	0.108357302930825	-4.42072824563944	9.83688204389899e-06	0.000668043	ENST00000439616+ENST00000443864+ENST00000449767+ENST00000447398+ENST00000419661+ENST00000444676+ENST00000222673+ENST00000543843+ENST00000459672+ENST00000497326	protein_coding	24.4948
ENSG00000164877	MICALL2	22.3702213195937	-0.922722	0.189163500230773	-4.87790627546276	1.07217846247011e-06	0.000114635	ENST00000493998+ENST00000496184+ENST00000472100+ENST00000405088+ENST00000467394+ENST00000297508+ENST00000413446+ENST00000479007+ENST00000471899+ENST00000470807+ENST00000487187+ENST00000460198+ENST00000487156+ENST00000467783+ENST00000482839+ENST00000490608	protein_coding	24.4092
ENSG00000111676	ATN1	149.101030009403	-0.595041	0.149288358665507	-3.98584809978983	6.72395197827171e-05	0.00275582	ENST00000356654+ENST00000396684+ENST00000541029+ENST00000537488	protein_coding	24.3237
ENSG00000105613	MAST1	179.630770266052	-0.399971	0.0972622483315674	-4.11229075081544	3.91752491785421e-05	0.00189505	ENST00000591495+ENST00000590883+ENST00000251472+ENST00000588379+ENST00000592713+ENST00000590204+ENST00000589040+ENST00000590553+ENST00000585791	protein_coding	24.2235
ENSG00000197959	DNM3	328.622765919242	0.432031	0.101902735850672	4.23964494040889	2.23873606340782e-05	0.00125472	ENST00000358155+ENST00000367733+ENST00000367731+ENST00000355305+ENST00000520906+ENST00000523513+ENST00000485254+ENST00000491124	protein_coding	24.138
ENSG00000050130	JKAMP	87.17316431033	0.52042	0.145806817328552	3.56924404381222	0.000358012807862991	0.00934194	ENST00000261247+ENST00000554754+ENST00000557560+ENST00000425728+ENST00000553156+ENST00000555491+ENST00000556985+ENST00000554271+ENST00000554795+ENST00000553941+ENST00000602482+ENST00000356057+ENST00000554721+ENST00000553647	protein_coding	24.0785
ENSG00000131828	PDHA1	68.7264194515213	0.516034	0.141777899685303	3.63973716063611	0.000272916476098628	0.00781331	ENST00000540249+ENST00000545074+ENST00000379806+ENST00000423505+ENST00000417819+ENST00000422285+ENST00000492364+ENST00000355808+ENST00000379805+ENST00000479146+ENST00000481733+ENST00000379804+ENST00000478795	protein_coding	24.0365
ENSG00000123416	TUBA1B	15.6319636162443	1.19577	0.238323780000189	5.01743833773703	5.23650003930838e-07	6.49856e-05	ENST00000336023+ENST00000332858+ENST00000547765+ENST00000550367+ENST00000551324+ENST00000549870+ENST00000547476+ENST00000552984	protein_coding	24.0071
ENSG00000226415	TPI1P1	30.7064633251929	1.58276	0.20346655767157	7.77896541281799	7.31200476947887e-15	2.5408e-11	ENST00000420977	pseduogene	23.7788
ENSG00000232859	LYRM9	29.114530489819	-0.436506	0.141503984357196	-3.08476175382282	0.00203715265365705	0.031184	ENST00000379103+ENST00000460380+ENST00000508862+ENST00000508816+ENST00000582343+ENST00000379102+ENST00000503642	protein_coding	23.6111
ENSG00000110237	ARHGEF17	242.34461424882	-0.294458	0.0822860443279314	-3.57847427661012	0.000345605875992224	0.00914408	ENST00000263674+ENST00000544519+ENST00000536170+ENST00000537198+ENST00000536481+ENST00000543530	protein_coding	23.2062
ENSG00000135127	CCDC64	21.672603247569	-0.530013	0.175632595901843	-3.01773558200938	0.00254671008946298	0.0363112	ENST00000397558+ENST00000546420+ENST00000546861+ENST00000446727+ENST00000546790+ENST00000257583+ENST00000548673+ENST00000550197+ENST00000546460+ENST00000547841+ENST00000546502+ENST00000546857+ENST00000550245	protein_coding	23.1232
ENSG00000105516	DBP	35.0623117884582	0.468369	0.149276142127307	3.13760283893145	0.00170335508639412	0.0276368	ENST00000222122+ENST00000599385+ENST00000594723+ENST00000593500+ENST00000601104	protein_coding	23.0921
ENSG00000136522	MRPL47	50.263331169398	0.47657	0.154335210080846	3.08788895331858	0.00201583782140112	0.0310171	ENST00000476781+ENST00000259038+ENST00000392659	protein_coding	22.9076
ENSG00000116254	CHD5	274.501721466413	-0.406681	0.113399638547253	-3.58626144601371	0.000335452649772251	0.00900179	ENST00000378021+ENST00000262450+ENST00000462991+ENST00000475121+ENST00000377999+ENST00000496404+ENST00000491020	protein_coding	22.7431
ENSG00000088247	KHSRP	40.5714353747839	-0.628632	0.132147347521933	-4.75705089603513	1.9644165456174e-06	0.00018366	ENST00000398148+ENST00000594745+ENST00000597656+ENST00000595223+ENST00000594496+ENST00000600480+ENST00000599642+ENST00000599395+ENST00000595112+ENST00000595548+ENST00000595258+ENST00000597704	protein_coding	22.6676
ENSG00000087152	ATXN7L3	105.129043905103	-0.383677	0.125000678544278	-3.06939602654593	0.00214492051841987	0.0321723	ENST00000389384+ENST00000454077+ENST00000591295+ENST00000593073+ENST00000586688+ENST00000587097+ENST00000590537+ENST00000589607+ENST00000591807+ENST00000587022+ENST00000590169+ENST00000589805	protein_coding	22.6574
ENSG00000044574	HSPA5	152.616938967541	0.421169	0.115035313194297	3.6612107072662	0.000251026199533147	0.00738173	ENST00000324460	protein_coding	22.5403
ENSG00000137171	KLC4	37.84549785195	-0.432685	0.148899845133135	-2.90587802392782	0.0036622418021344	0.0470056	ENST00000467906+ENST00000347162+ENST00000453940+ENST00000470728+ENST00000458460+ENST00000259708+ENST00000479388+ENST00000472792+ENST00000460283+ENST00000481499+ENST00000394056+ENST00000394058+ENST00000481888+ENST00000472172+ENST00000479632+ENST00000468114+ENST00000469987+ENST00000463063+ENST00000463168+ENST00000486439	protein_coding	22.4998
ENSG00000122574	WIPF3	141.541807347221	-0.258323	0.0874881402570336	-2.95266072634485	0.00315048012708342	0.0424195	ENST00000409123+ENST00000242140+ENST00000409290	protein_coding	22.4425
ENSG00000184924	PTRHD1	33.9926652068721	0.496358	0.160555573072124	3.09150202168909	0.00199146626216042	0.0308872	ENST00000328379+ENST00000480190+ENST00000467797+ENST00000474668+ENST00000487316+ENST00000492046	protein_coding	22.4304
ENSG00000082153	BZW1	45.0237711651241	0.692484	0.111666638743452	6.20135419374554	5.5979368501343e-10	2.82917e-07	ENST00000450637+ENST00000409600+ENST00000410110+ENST00000452206+ENST00000464483+ENST00000460660+ENST00000409226+ENST00000452790+ENST00000447069+ENST00000419090+ENST00000463310+ENST00000491576+ENST00000359893	protein_coding	22.4079
ENSG00000090863	GLG1	164.928655560062	-0.304421	0.0982282702544196	-3.09912099870049	0.00194095733386493	0.0303806	ENST00000205061+ENST00000422840+ENST00000447066+ENST00000562090+ENST00000567951+ENST00000561942+ENST00000561481+ENST00000563646+ENST00000563432+ENST00000566601+ENST00000567911+ENST00000565474+ENST00000565260	protein_coding	22.3551
ENSG00000143258	USP21	42.8446415168276	-0.601481	0.20763752002071	-2.89678180374553	0.00377011870914728	0.0478996	ENST00000492950+ENST00000368002+ENST00000289865+ENST00000479344+ENST00000368001+ENST00000486299+ENST00000487163+ENST00000482385+ENST00000493054+ENST00000485277	protein_coding	22.2798
ENSG00000198208	RPS6KL1	44.5329500617641	-0.42964	0.146453639798981	-2.93362435670278	0.00335029412929699	0.0441906	ENST00000555834+ENST00000555647+ENST00000555009+ENST00000555910+ENST00000354625+ENST00000553646+ENST00000556848+ENST00000553315+ENST00000553971+ENST00000553789+ENST00000358328+ENST00000557413+ENST00000554834+ENST00000553894+ENST00000554900+ENST00000557383+ENST00000556776	protein_coding	22.2716
ENSG00000184708	EIF4ENIF1	82.2775802540745	-0.373427	0.127975416001097	-2.91796166176247	0.00352327665859101	0.045597	ENST00000441289+ENST00000344710+ENST00000495101+ENST00000397525+ENST00000330125+ENST00000397523+ENST00000382180+ENST00000445424+ENST00000475437+ENST00000487671+ENST00000418321+ENST00000423097+ENST00000397520+ENST00000397518	protein_coding	22.1875
ENSG00000159842	ABR	111.725701813117	-0.448725	0.113083117254994	-3.96809774890247	7.24486187065691e-05	0.00292163	ENST00000302538+ENST00000544583+ENST00000572585+ENST00000572441+ENST00000571797+ENST00000574437+ENST00000291107+ENST00000543210+ENST00000536794+ENST00000573559+ENST00000572650+ENST00000570688+ENST00000571120+ENST00000571383+ENST00000571022+ENST00000572152+ENST00000577052+ENST00000574257+ENST00000576668+ENST00000574875+ENST00000575770+ENST00000576964+ENST00000574544+ENST00000573895+ENST00000571945…	protein_coding	22.1831
ENSG00000175581	MRPL48	30.0437010675864	0.770652	0.182675588821897	4.21869070273055	2.45725084954589e-05	0.00133415	ENST00000310614+ENST00000535529+ENST00000508278+ENST00000540162+ENST00000544140+ENST00000544819+ENST00000497094+ENST00000411840+ENST00000398483+ENST00000535277+ENST00000542303+ENST00000537007+ENST00000543058+ENST00000543374+ENST00000314282	protein_coding	22.1768
ENSG00000118402	ELOVL4	126.41208167356	0.331009	0.0925994958043051	3.57462981863387	0.000350723762374561	0.00923263	ENST00000369816	protein_coding	22.0986
ENSG00000105426	PTPRS	267.045259660308	0.324196	0.0927514612641492	3.49532244981703	0.0004734893567614	0.0113599	ENST00000588552+ENST00000353284+ENST00000348075+ENST00000262963+ENST00000357368+ENST00000372412+ENST00000587303+ENST00000588012+ENST00000592099+ENST00000589851+ENST00000590509+ENST00000591760+ENST00000586065	protein_coding	22.0212
ENSG00000167112	TRUB2	66.8287889145919	0.467339	0.126808468427823	3.68538929693328	0.000228353324511945	0.00681472	ENST00000372890+ENST00000546104+ENST00000460320+ENST00000461180	protein_coding	21.9214
ENSG00000086015	MAST2	184.962874713772	-0.283766	0.0879434180156212	-3.22668843559002	0.00125231741740429	0.022335	ENST00000470809+ENST00000372009+ENST00000361297+ENST00000372008+ENST00000482881+ENST00000488619+ENST00000467367+ENST00000498668+ENST00000477968+ENST00000492813	protein_coding	21.8957
ENSG00000106605	BLVRA	44.9867897742929	0.601447	0.16917467631513	3.55518327459417	0.000377715705928478	0.00965073	ENST00000265523+ENST00000402924+ENST00000424330+ENST00000453612+ENST00000486984	protein_coding	21.8628
ENSG00000104852	SNRNP70	49.0825096571993	-0.994669	0.147730187820131	-6.73301373933381	1.66184363143948e-11	1.82357e-08	ENST00000601065+ENST00000598441+ENST00000598984+ENST00000401730+ENST00000221448+ENST00000597936+ENST00000595231+ENST00000601411+ENST00000599687+ENST00000544278	protein_coding	21.7425
ENSG00000138071	ACTR2	135.22770953265	0.414017	0.0838862070452424	4.93546120501174	7.99615746159036e-07	9.23265e-05	ENST00000260641+ENST00000476840+ENST00000542850+ENST00000471552+ENST00000377982	protein_coding	21.5989
ENSG00000106399	RPA3	21.7707777919803	0.556786	0.182306419637024	3.05411925794006	0.00225722330895179	0.03324	ENST00000223129+ENST00000406109+ENST00000396682+ENST00000401447+ENST00000483031+ENST00000462723+ENST00000463632	protein_coding	21.5848
ENSG00000158869	FCER1G	17.3197661524831	-0.846095	0.268485087932665	-3.1513666635925	0.00162508342191923	0.0266922	ENST00000490414+ENST00000367992+ENST00000289902	protein_coding	21.3493
ENSG00000174460	ZCCHC12	65.4078809880072	-0.675172	0.155692614560627	-4.33657244167883	1.44721744881988e-05	0.0008937	ENST00000310164	protein_coding	21.2805
ENSG00000114503	NCBP2	80.210291835128	0.441216	0.137103116019968	3.21813303282106	0.0012902795845094	0.0227782	ENST00000467803+ENST00000447325+ENST00000321256+ENST00000463783+ENST00000428425+ENST00000427641+ENST00000452404+ENST00000468923+ENST00000422610+ENST00000411704+ENST00000479647+ENST00000482976+ENST00000455953	protein_coding	21.2167
ENSG00000100266	PACSIN2	98.445733632818	-0.435537	0.102184973955144	-4.26223687958627	2.02390736371623e-05	0.00115924	ENST00000507586+ENST00000337959+ENST00000263246+ENST00000407585+ENST00000403744+ENST00000402229+ENST00000453643+ENST00000422336+ENST00000418133+ENST00000445706+ENST00000453079	protein_coding	21.2145
ENSG00000121310	ECHDC2	32.5560928046747	-0.661104	0.191928061284787	-3.44454146050618	0.000572028898734341	0.0128654	ENST00000371522+ENST00000460612+ENST00000539680+ENST00000371520+ENST00000463923+ENST00000543419+ENST00000479183+ENST00000358358+ENST00000498544+ENST00000536120+ENST00000476477+ENST00000479593+ENST00000467988+ENST00000487866+ENST00000486170+ENST00000487851+ENST00000541281+ENST00000488268+ENST00000544365+ENST00000495920+ENST00000492992+ENST00000544531+ENST00000480312+ENST00000493896+ENST00000487040…	protein_coding	21.0924
ENSG00000197530	MIB2	14.7259206281899	-1.23257	0.198197088380563	-6.21889135869565	5.00679807303314e-10	2.67658e-07	ENST00000378710+ENST00000360522+ENST00000357210+ENST00000520777+ENST00000355826+ENST00000518681+ENST00000505820+ENST00000479659+ENST00000489635+ENST00000511502+ENST00000477990+ENST00000514363+ENST00000487053+ENST00000502470+ENST00000378712+ENST00000507082+ENST00000463492+ENST00000510793+ENST00000504599+ENST00000507229+ENST00000512004+ENST00000503789+ENST00000378708+ENST00000506488+ENST00000508455…	protein_coding	20.9181
ENSG00000144867	SRPRB	119.295829237898	0.589724	0.11410404295559	5.16830362440519	2.36228321015341e-07	3.44414e-05	ENST00000466490+ENST00000484684+ENST00000494297+ENST00000481356+ENST00000466636	protein_coding	20.8702
ENSG00000175606	TMEM70	68.5857009352672	0.476379	0.131443439537943	3.62421470549669	0.000289840758517208	0.00814406	ENST00000520167+ENST00000523794+ENST00000416961+ENST00000517439+ENST00000312184+ENST00000517614+ENST00000519551	protein_coding	20.8348
ENSG00000100241	SBF1	54.0587439145736	-0.59685	0.149377770986707	-3.99557339940207	6.45378573475624e-05	0.00268573	ENST00000380817+ENST00000348911+ENST00000418590+ENST00000470434+ENST00000473724+ENST00000390679+ENST00000476293+ENST00000477234+ENST00000399627	protein_coding	20.809
ENSG00000248648	RP11-485M7.1	11.6195639134315	0.856204	0.165377634308159	5.17726399378418	2.25163501573242e-07	3.32939e-05	ENST00000505029	pseduogene	20.7666
ENSG00000196821	C6orf106	148.866028166141	0.28066	0.0885197455693165	3.17059380907506	0.00152127703445609	0.0257027	ENST00000374026+ENST00000374023+ENST00000374021	protein_coding	20.6023
ENSG00000168255	POLR2J3	4.57865976954963	-0.953816	0.172958524670543	-5.51471070907569	3.49354127024203e-08	7.35726e-06	ENST00000489144+ENST00000464525+ENST00000379357+ENST00000379340+ENST00000486319+ENST00000503564+ENST00000443430+ENST00000508848+ENST00000506060+ENST00000608621+ENST00000504157+ENST00000508910+ENST00000513506+ENST00000507355+ENST00000511313+ENST00000513438+ENST00000504101+ENST00000511773+ENST00000504677+ENST00000502415	protein_coding	20.5555
ENSG00000180964	TCEAL8	51.9489289764365	0.616898	0.17598482690087	3.50540234925207	0.000455917714186644	0.0110786	ENST00000372685+ENST00000360000+ENST00000451678	protein_coding	20.4065
ENSG00000088387	DOCK9	102.514279311986	-0.534031	0.143326028395192	-3.72599014621772	0.000194550004329028	0.00609951	ENST00000376460+ENST00000400228+ENST00000339416+ENST00000419908+ENST00000451563+ENST00000340449+ENST00000448493+ENST00000481051+ENST00000449796+ENST00000450257+ENST00000472874+ENST00000461998+ENST00000442173+ENST00000473165+ENST00000427887+ENST00000479769	protein_coding	20.3583
ENSG00000231865	SIK3-IT1	2.87413772008493	-0.808041	0.266350032105997	-3.03375439656158	0.0024153097502953	0.0349215	ENST00000454832	sense_intronic	20.3198
ENSG00000023572	GLRX2	24.7496150639259	0.52707	0.174392980721303	3.02231203237478	0.00250851821498228	0.0359451	ENST00000367440+ENST00000367439+ENST00000472197	protein_coding	20.3188
ENSG00000215769	hsa-mir-6080	8.24877793644998	-0.781185	0.234425890217421	-3.33233378956686	0.000861208958542013	0.0172526	ENST00000400873+ENST00000578492+ENST00000579125	processed_transcript	20.277
ENSG00000175931	UBE2O	182.585422983643	-0.337887	0.0947175854167809	-3.56730940890054	0.000360665526435744	0.00939347	ENST00000319380+ENST00000587127+ENST00000586409+ENST00000587581+ENST00000590658+ENST00000586505	protein_coding	20.0817
ENSG00000130511	SSBP4	15.1182037264625	-0.71064	0.191850454087477	-3.70413691020499	0.000212111682370517	0.00648433	ENST00000597724+ENST00000348495+ENST00000270061+ENST00000601357+ENST00000598159+ENST00000607020+ENST00000601614+ENST00000602088+ENST00000600628+ENST00000600244+ENST00000601919+ENST00000601444+ENST00000593641+ENST00000599699	protein_coding	20.0107
ENSG00000160087	UBE2J2	69.8152138257606	-0.4612	0.130205778779967	-3.54208515893505	0.00039697729229056	0.010008	ENST00000450390+ENST00000347370+ENST00000349431+ENST00000348298+ENST00000339385+ENST00000400929+ENST00000464036+ENST00000360466+ENST00000400930+ENST00000467339+ENST00000473215+ENST00000435198+ENST00000509720+ENST00000491779+ENST00000466752+ENST00000503294+ENST00000477894+ENST00000471154+ENST00000422076+ENST00000502382+ENST00000461142+ENST00000488418	protein_coding	20.0075
ENSG00000127483	HP1BP3	97.9084992559833	-0.404594	0.092970695086288	-4.3518416681314	1.34998740893422e-05	0.000846889	ENST00000312239+ENST00000375003+ENST00000488722+ENST00000491748+ENST00000419948+ENST00000438032+ENST00000424732+ENST00000417710+ENST00000487117+ENST00000375000+ENST00000437575+ENST00000419490+ENST00000414993+ENST00000443615	protein_coding	19.9995
ENSG00000196220	SRGAP3	228.125281489438	-0.273125	0.0819812349664765	-3.33154921231548	0.000863640284725617	0.0172637	ENST00000383836+ENST00000360413+ENST00000491467+ENST00000520860+ENST00000518265+ENST00000475560+ENST00000433332+ENST00000485983+ENST00000470951+ENST00000480750+ENST00000490889+ENST00000490348	protein_coding	19.8689
ENSG00000196588	MKL1	83.4433933634618	-0.490492	0.121911714092766	-4.023336980031	5.73793054894989e-05	0.00251853	ENST00000355630+ENST00000396617+ENST00000402042+ENST00000407029+ENST00000477468+ENST00000402630+ENST00000422851+ENST00000463769+ENST00000466278	protein_coding	19.8424
ENSG00000159214	CCDC24	26.7333382558444	-0.70349	0.19084922389615	-3.68610235806512	0.000227714793530751	0.00681151	ENST00000486064+ENST00000372318+ENST00000460543+ENST00000463846+ENST00000490563+ENST00000490064+ENST00000486504+ENST00000485811+ENST00000466180+ENST00000479055+ENST00000472562	protein_coding	19.7909
ENSG00000148468	FAM171A1	116.964401740327	-0.353051	0.116621758675963	-3.0273191261599	0.00246733324188516	0.0354768	ENST00000378116+ENST00000477161+ENST00000455654	protein_coding	19.7701
ENSG00000151131	C12orf45	21.8003566959294	0.657444	0.211358316652811	3.11056562312221	0.00186729399612871	0.0295503	ENST00000552951+ENST00000280749+ENST00000548583	protein_coding	19.7084
ENSG00000064651	SLC12A2	267.873930420686	0.353901	0.104955065921407	3.37192461537537	0.000746448766147531	0.015704	ENST00000262461+ENST00000509205+ENST00000343225+ENST00000504416+ENST00000509616+ENST00000507791+ENST00000502849	protein_coding	19.6998
ENSG00000214182	PTMAP5	7.29917015484845	-0.496628	0.125254498858102	-3.96494806896099	7.3411927620856e-05	0.00293962	ENST00000607242+ENST00000393073	uncertain	19.6099
ENSG00000233328	PFN1P1	11.3355555205323	0.628084	0.157133128887848	3.99714261720792	6.41116783847879e-05	0.00267869	ENST00000442087	pseduogene	19.4649
ENSG00000150753	CCT5	48.787426714256	0.830131	0.165887578252327	5.00417645760076	5.61013502146828e-07	6.80033e-05	ENST00000280326+ENST00000503026+ENST00000515390+ENST00000511700+ENST00000508451+ENST00000423695+ENST00000512975+ENST00000510326+ENST00000503454+ENST00000515676+ENST00000506600+ENST00000514674+ENST00000509846+ENST00000511995	protein_coding	19.4511
ENSG00000153443	UBALD1	18.3867855259403	-0.703423	0.182885852628607	-3.84624087259982	0.000119943853477301	0.00422144	ENST00000591897+ENST00000283474+ENST00000591401+ENST00000590965+ENST00000590891+ENST00000588691+ENST00000587615+ENST00000587649+ENST00000591113	protein_coding	19.3325
ENSG00000249256	ATP5LP3	10.8286946402319	0.720743	0.161499404588017	4.4628198039033	8.08880737089846e-06	0.000563851	ENST00000514223	pseduogene	19.2352
ENSG00000198513	ATL1	27.2834576319381	0.817872	0.215936320193158	3.78756177190571	0.000152132869585185	0.00507491	ENST00000556478+ENST00000441560+ENST00000555960+ENST00000553509+ENST00000354525+ENST00000357032+ENST00000358385+ENST00000554886+ENST00000557735+ENST00000553746+ENST00000555266+ENST00000556067	protein_coding	19.2135
ENSG00000142156	COL6A1	72.377226404298	-0.493407	0.147304160351429	-3.3495772530361	0.000809349825476515	0.0165271	ENST00000361866+ENST00000492851+ENST00000466285+ENST00000463060+ENST00000498614+ENST00000486023	protein_coding	19.17
ENSG00000065427	KARS	59.9701244710556	0.492777	0.129167986562056	3.81501028489273	0.000136177261736442	0.00463759	ENST00000302445+ENST00000319410+ENST00000568378+ENST00000564578+ENST00000569298+ENST00000562875+ENST00000566560+ENST00000566249+ENST00000566772+ENST00000568682+ENST00000570215+ENST00000565738	protein_coding	19.1426
ENSG00000138095	LRPPRC	214.756393581252	0.336768	0.0892870734197239	3.771746146521	0.000162109134492815	0.00527272	ENST00000260665+ENST00000419884+ENST00000463456+ENST00000472420+ENST00000483489+ENST00000467058+ENST00000409946+ENST00000409659+ENST00000447246	protein_coding	19.0879
ENSG00000109099	PMP22	57.7199036720471	-0.78078	0.244985557185443	-3.18704447589726	0.00143734670595647	0.0248691	ENST00000312280+ENST00000395938+ENST00000494511+ENST00000395936+ENST00000580584+ENST00000426385+ENST00000580497+ENST00000471150	protein_coding	19.0319
ENSG00000143537	ADAM15	18.2584001596853	-0.693955	0.219383635078298	-3.16320255964628	0.00156043716749768	0.0261686	ENST00000473905+ENST00000533732+ENST00000480331+ENST00000527418+ENST00000368410+ENST00000355956+ENST00000368412+ENST00000360674+ENST00000359280+ENST00000449910+ENST00000356955+ENST00000526491+ENST00000529473+ENST00000531703+ENST00000477533+ENST00000271836+ENST00000461564+ENST00000368413+ENST00000485346+ENST00000487956+ENST00000531455+ENST00000531831+ENST00000447332+ENST00000472434+ENST00000534019…	protein_coding	18.891
ENSG00000109919	MTCH2	77.4493687413428	0.370599	0.126610819939974	2.92707084244212	0.00342170930632814	0.0447006	ENST00000539759+ENST00000302503+ENST00000542981+ENST00000530428+ENST00000533571+ENST00000525649+ENST00000534074	protein_coding	18.7695
ENSG00000100307	CBX7	90.5861805754667	-0.372173	0.119062229048986	-3.12587042273888	0.00177279646369673	0.0284973	ENST00000475962+ENST00000216133+ENST00000401405+ENST00000434260+ENST00000477827+ENST00000482294+ENST00000490741	protein_coding	18.7081
ENSG00000029725	RABEP1	168.800134677835	0.29042	0.0905885532792544	3.20592088541483	0.00134630998303913	0.0235283	ENST00000408982+ENST00000262477+ENST00000575991+ENST00000537505+ENST00000546142+ENST00000575475+ENST00000341923+ENST00000570487+ENST00000574568+ENST00000572250	protein_coding	18.6707
ENSG00000161642	ZNF385A	56.2043568263592	-0.446216	0.143594532641455	-3.10747343059868	0.00188693946192728	0.0296912	ENST00000551109+ENST00000352268+ENST00000394313+ENST00000338010+ENST00000550779+ENST00000546970+ENST00000552382+ENST00000551771+ENST00000546919+ENST00000549937+ENST00000549962+ENST00000547210+ENST00000550774+ENST00000550120+ENST00000551864	protein_coding	18.5391
ENSG00000174943	KCTD13	24.3776292930546	-0.522478	0.169822950141271	-3.07660528545219	0.0020937234714528	0.0317008	ENST00000308768+ENST00000568000+ENST00000566842+ENST00000568995+ENST00000563955+ENST00000563264+ENST00000566413+ENST00000561540+ENST00000568721	protein_coding	18.4206
ENSG00000143013	LMO4	157.005979967116	-0.341114	0.100741234936011	-3.38604437580564	0.000709079163266738	0.0151627	ENST00000370544+ENST00000495705+ENST00000370542+ENST00000489303	protein_coding	18.338
ENSG00000137103	TMEM8B	66.4628254642592	-0.509148	0.134792609497405	-3.7772687675072	0.000158557598965358	0.00520593	ENST00000377996+ENST00000439587+ENST00000377991+ENST00000464519+ENST00000377988+ENST00000472010+ENST00000490199+ENST00000473947	protein_coding	18.2076
ENSG00000180992	MRPL14	35.1019983451816	0.537463	0.180890986028029	2.97119622324319	0.00296642180152441	0.0406086	ENST00000372014	protein_coding	18.1585
ENSG00000007402	CACNA2D2	133.829905699795	-0.33084	0.108958758336403	-3.03637566053343	0.00239440841499391	0.0347156	ENST00000395083+ENST00000435965+ENST00000360963+ENST00000266039+ENST00000429770+ENST00000423994+ENST00000483620+ENST00000424201+ENST00000479441+ENST00000487413	protein_coding	18.1381
ENSG00000188486	H2AFX	37.9890511230825	-0.703206	0.137956368927911	-5.09731005087838	3.44513817018824e-07	4.69462e-05	ENST00000530167+ENST00000375167	protein_coding	18.1187
ENSG00000135956	TMEM127	145.021243531099	-0.358157	0.112632762616704	-3.17986594150134	0.00147343199386848	0.0252836	ENST00000258439+ENST00000432959+ENST00000435268	protein_coding	18.1173
ENSG00000134243	SORT1	203.808570509721	-0.367508	0.118922743430641	-3.09031133354718	0.00199946788036871	0.0309021	ENST00000256637+ENST00000485149+ENST00000538502+ENST00000466471+ENST00000493736+ENST00000482236+ENST00000483508+ENST00000495777+ENST00000471996	protein_coding	18.083
ENSG00000115760	BIRC6	96.4575852076426	-0.450814	0.132808149667383	-3.39447783746727	0.00068759605074362	0.0148096	ENST00000421745+ENST00000466527+ENST00000444173+ENST00000431454+ENST00000483194+ENST00000462504+ENST00000497023+ENST00000496555+ENST00000461788+ENST00000471232+ENST00000470250+ENST00000465130	protein_coding	17.9801
ENSG00000114942	EEF1B2	16.6026950606932	0.736459	0.14467744689144	5.09034929906797	3.57404524187165e-07	4.7712e-05	ENST00000236957+ENST00000392221+ENST00000392222+ENST00000445505+ENST00000479587+ENST00000429769+ENST00000460760+ENST00000415904+ENST00000455150+ENST00000435123+ENST00000482103	protein_coding	17.9795
ENSG00000036530	CYP46A1	46.7666294894934	-0.408812	0.131553180204158	-3.10758313878349	0.00188623922280083	0.0296912	ENST00000554611+ENST00000261835+ENST00000423126+ENST00000380228+ENST00000554176+ENST00000554917+ENST00000556313+ENST00000556822	protein_coding	17.9701
ENSG00000234608	MAPKAPK5-AS1	8.72216734530619	1.06582	0.192530750547546	5.53584950787447	3.09723428594447e-08	6.72648e-06	ENST00000443596+ENST00000456429+ENST00000428207+ENST00000442119+ENST00000590479+ENST00000609228+ENST00000609983	lincRNA	17.9299
ENSG00000201136	RNU6-353P	2.2925522564557	-0.781978	0.24072210325295	-3.24846905711477	0.00116027827726332	0.0212759	ENST00000364266	snRNA	17.8525
ENSG00000213613	RP11-380G5.3	13.6366457301077	-0.410691	0.131917500017265	-3.11323761558432	0.0018504696821634	0.0294058	ENST00000395256	pseduogene	17.7873
ENSG00000108239	TBC1D12	19.3731561185771	-0.833956	0.251037188890807	-3.32204346919668	0.000893607712119394	0.0176261	ENST00000225235+ENST00000485048+ENST00000457045	protein_coding	17.7867
ENSG00000154328	NEIL2	69.8766490043388	0.457332	0.148186148269479	3.08620041795463	0.00202732123844762	0.0311708	ENST00000436750+ENST00000455213+ENST00000403422+ENST00000528323+ENST00000528113+ENST00000284503+ENST00000524741	protein_coding	17.7675
ENSG00000234106	RP11-288E14.2	12.224729794593	0.893058	0.183910301261966	4.85594103292559	1.1981635591347e-06	0.000123666	ENST00000533701	pseduogene	17.7484
ENSG00000171476	HOPX	31.4577093618195	-0.762511	0.24829092977367	-3.071037932073	0.0021331604919077	0.032042	ENST00000554144+ENST00000420433+ENST00000508121+ENST00000337881+ENST00000381260+ENST00000556376+ENST00000556614+ENST00000555760+ENST00000317745+ENST00000381255+ENST00000553379+ENST00000503639+ENST00000503864+ENST00000557328+ENST00000605395+ENST00000506661	protein_coding	17.7204
ENSG00000261113	RP11-141O15.1	8.46634050654232	-1.05121	0.218299850692077	-4.81541822999193	1.46891906624141e-06	0.000146533	ENST00000568125+ENST00000562376+ENST00000563344	antisense	17.7116
ENSG00000114742	WDR48	95.5261190421395	-0.362506	0.117325118251399	-3.08975353182781	0.00200322653881765	0.0309143	ENST00000302313+ENST00000423296+ENST00000418020+ENST00000396258+ENST00000544962+ENST00000413099+ENST00000433841+ENST00000420940+ENST00000441361+ENST00000489838+ENST00000463198+ENST00000477197+ENST00000466405	protein_coding	17.7034
ENSG00000228929	RP11-159C21.4	11.8073272953435	0.481007	0.130383002012418	3.68918241048031	0.000224975877195834	0.00673926	ENST00000437890	pseduogene	17.6964
ENSG00000102910	LONP2	139.747410884842	0.374356	0.107182091026448	3.49270577176945	0.000478153039453104	0.0114007	ENST00000285737+ENST00000535754+ENST00000416006+ENST00000566755+ENST00000570174+ENST00000565867+ENST00000564259+ENST00000566719+ENST00000565185	protein_coding	17.6013
ENSG00000100413	POLR3H	67.1823126741717	0.426392	0.142159542554811	2.99939146643194	0.00270519484649341	0.0380314	ENST00000396504+ENST00000355209+ENST00000337566+ENST00000431534+ENST00000432789+ENST00000407461+ENST00000442616+ENST00000420561+ENST00000483837	protein_coding	17.5656
ENSG00000128965	CHAC1	74.1608658152066	0.781443	0.18737049070794	4.17057865281457	3.03827167252178e-05	0.00156794	ENST00000444189+ENST00000446533+ENST00000487220	protein_coding	17.5416
ENSG00000167110	GOLGA2	96.1094399309755	-0.31	0.100800221322598	-3.07538991458349	0.00210227519717486	0.0317472	ENST00000421699+ENST00000609374+ENST00000462089+ENST00000496221+ENST00000486411+ENST00000461031+ENST00000470630+ENST00000450617+ENST00000490257+ENST00000468488+ENST00000458730+ENST00000490628	protein_coding	17.4329
ENSG00000138386	NAB1	127.109283695299	0.420985	0.124065464306044	3.39325075206941	0.000690683820049757	0.0148454	ENST00000448811+ENST00000416973+ENST00000426601+ENST00000409581+ENST00000337386+ENST00000357215+ENST00000423376+ENST00000409641+ENST00000423076+ENST00000545490+ENST00000434473+ENST00000484774	protein_coding	17.4073
ENSG00000205581	HMGN1	21.7415359985966	-0.631725	0.195103198440506	-3.23789928345135	0.00120413310627763	0.0218005	ENST00000492280+ENST00000380749+ENST00000431390+ENST00000486741+ENST00000288344+ENST00000361263+ENST00000436324+ENST00000380748+ENST00000419378+ENST00000489072+ENST00000482192+ENST00000380747+ENST00000485550+ENST00000490032+ENST00000443046+ENST00000464078+ENST00000491183+ENST00000479586+ENST00000471260+ENST00000482733+ENST00000463631	protein_coding	17.3852
ENSG00000212802	RPL15P3	5.94301056076799	0.868017	0.173234065982869	5.0106579496514	5.42442551669442e-07	6.69194e-05	ENST00000450992+ENST00000391491	pseduogene	17.3377
ENSG00000197461	PDGFA	74.3554807682075	0.409773	0.113374334128739	3.61433777157595	0.000301116289655049	0.00839301	ENST00000402802+ENST00000354513+ENST00000400761+ENST00000482462+ENST00000405692+ENST00000426681	protein_coding	17.2837
ENSG00000164124	TMEM144	77.42106485461	-0.727377	0.232535414263916	-3.12802631225064	0.0017598442594646	0.0283847	ENST00000505189+ENST00000505049+ENST00000511038+ENST00000296529+ENST00000512481+ENST00000514558+ENST00000509278+ENST00000513744+ENST00000511532+ENST00000502698+ENST00000514971+ENST00000508243+ENST00000503200+ENST00000514346+ENST00000504569+ENST00000503404+ENST00000512272	protein_coding	17.0855
ENSG00000031823	RANBP3	79.6954455485437	-0.584455	0.120939018932063	-4.83263912513887	1.34734890883132e-06	0.000136363	ENST00000340578+ENST00000439268+ENST00000592771+ENST00000541471+ENST00000586344+ENST00000591092+ENST00000034275+ENST00000587479+ENST00000592197+ENST00000587411+ENST00000592621+ENST00000587799+ENST00000590623+ENST00000591736+ENST00000593025+ENST00000590953+ENST00000588879+ENST00000587159+ENST00000586117+ENST00000589353+ENST00000587463+ENST00000588010+ENST00000591124+ENST00000585339+ENST00000592133…	protein_coding	17.0419
ENSG00000130723	PRRC2B	123.142548486187	-0.471579	0.10780956892488	-4.37418443688166	1.21887297346207e-05	0.000774765	ENST00000405995+ENST00000357304+ENST00000458550+ENST00000489593+ENST00000372249+ENST00000422467+ENST00000456307+ENST00000451855+ENST00000320547+ENST00000465931	protein_coding	17.0349
ENSG00000076344	RGS11	45.3838690047659	-0.788465	0.174076169261537	-4.52942338618296	5.91448755282377e-06	0.000448404	ENST00000168869+ENST00000397770+ENST00000316163+ENST00000477143+ENST00000359740+ENST00000481672+ENST00000493449+ENST00000397768+ENST00000431291+ENST00000472466	protein_coding	16.9487
ENSG00000183527	PSMG1	26.4833831402983	0.567229	0.184165887775755	3.07999139713946	0.00207006574160992	0.0314798	ENST00000331573+ENST00000481921+ENST00000411828+ENST00000380900+ENST00000431628	protein_coding	16.8734
ENSG00000266753	RP11-690G19.3	41.6417440308216	-0.592633	0.139092061092257	-4.26072499498189	2.03764834651133e-05	0.00116392	ENST00000585086	lincRNA	16.7751
ENSG00000100151	PICK1	44.9435975755329	-0.564319	0.132780423997218	-4.25001941118263	2.13751990759444e-05	0.00121101	ENST00000445628+ENST00000404072+ENST00000424694+ENST00000484021+ENST00000437453+ENST00000426258+ENST00000476157+ENST00000356976+ENST00000469819+ENST00000466374+ENST00000435166+ENST00000432756+ENST00000468288+ENST00000472724+ENST00000494434	protein_coding	16.6921
ENSG00000125648	SLC25A23	58.3716484718852	-0.629148	0.114363015996825	-5.50132774189236	3.76941774762176e-08	7.70476e-06	ENST00000595810+ENST00000598704+ENST00000264088+ENST00000598908+ENST00000601322+ENST00000601760+ENST00000301454+ENST00000593600+ENST00000414491+ENST00000600682+ENST00000597039+ENST00000334510+ENST00000595267+ENST00000597307	protein_coding	16.6906
ENSG00000196305	IARS	134.855503060934	0.620694	0.124540655640124	4.98386433457381	6.23267873832925e-07	7.38325e-05	ENST00000375643+ENST00000375629+ENST00000443024+ENST00000447699+ENST00000375627+ENST00000474340+ENST00000473915+ENST00000467876+ENST00000472894+ENST00000395554+ENST00000498025+ENST00000490438+ENST00000430417	protein_coding	16.5397
ENSG00000172137	CALB2	23.9658704980481	-1.09539	0.275958955674879	-3.96940712376348	7.2051683870393e-05	0.0029169	ENST00000349553+ENST00000302628+ENST00000562305+ENST00000490520+ENST00000467817	protein_coding	16.5107
ENSG00000181045	SLC26A11	64.4258275080661	-0.626706	0.13150874937124	-4.76551039323672	1.88376186249946e-06	0.000176912	ENST00000577155+ENST00000361193+ENST00000546047+ENST00000411502+ENST00000576126+ENST00000572652+ENST00000574967+ENST00000571602+ENST00000572725+ENST00000571564+ENST00000572226+ENST00000571176+ENST00000573809+ENST00000571888+ENST00000571072+ENST00000571215+ENST00000575019	protein_coding	16.5097
ENSG00000137815	RTF1	126.457583214019	-0.358829	0.0949187199796286	-3.7803836190948	0.000156586902330826	0.00518059	ENST00000558298+ENST00000389629+ENST00000462276+ENST00000473214+ENST00000560447+ENST00000558117+ENST00000561076	protein_coding	16.3679
ENSG00000101247	NDUFAF5	24.648170348873	0.594403	0.174529218181868	3.40575103371894	0.00065982320825897	0.0143415	ENST00000378106+ENST00000378081+ENST00000463598+ENST00000485738+ENST00000477732+ENST00000475968+ENST00000481249+ENST00000476536+ENST00000469177+ENST00000464269+ENST00000479716+ENST00000487478+ENST00000476124+ENST00000476200+ENST00000479682+ENST00000486772	protein_coding	16.306
ENSG00000223380	SEC22B	69.9613319755068	0.704475	0.151374157748321	4.65386543421793	3.25769450290475e-06	0.000270082	ENST00000453618+ENST00000500203	processed_transcript	16.2249
ENSG00000163866	SMIM12	96.9274854024195	0.402751	0.112021036493783	3.59531461413007	0.000323999784176583	0.00876144	ENST00000426886+ENST00000521580+ENST00000446026+ENST00000456842+ENST00000423898+ENST00000417239	protein_coding	16.2229
ENSG00000164172	MOCS2	61.464513225463	0.420479	0.138682865458963	3.0319452106633	0.00242983303267301	0.0350828	ENST00000361377+ENST00000396954+ENST00000502402+ENST00000450852+ENST00000510818+ENST00000508922+ENST00000582677+ENST00000584946+ENST00000527216+ENST00000514553	protein_coding	16.2155
ENSG00000143436	MRPL9	12.138546118673	0.684064	0.22769352019715	3.00432106654648	0.00266174273755443	0.0375471	ENST00000368830+ENST00000467306+ENST00000468006+ENST00000368829+ENST00000495867+ENST00000478926+ENST00000486707+ENST00000492684+ENST00000481777+ENST00000461182+ENST00000462783	protein_coding	16.1914
ENSG00000070366	SMG6	67.363461505519	-0.521801	0.13058535071958	-3.99586089035785	6.4459578483712e-05	0.00268573	ENST00000544865+ENST00000574501+ENST00000263073+ENST00000573166+ENST00000354901+ENST00000570756+ENST00000576218+ENST00000536871+ENST00000573153+ENST00000573827+ENST00000575454+ENST00000575338+ENST00000570874+ENST00000572369+ENST00000575176+ENST00000572205+ENST00000571442+ENST00000570659+ENST00000575663+ENST00000570606+ENST00000570668	protein_coding	16.1205
ENSG00000106089	STX1A	43.1238956341893	-0.501492	0.149741004401757	-3.34906411948935	0.000810850283433358	0.0165415	ENST00000395156+ENST00000222812+ENST00000484736+ENST00000480126+ENST00000491645+ENST00000395154+ENST00000497980+ENST00000491427+ENST00000496216+ENST00000395155+ENST00000461441+ENST00000470878+ENST00000494245+ENST00000462135	protein_coding	16.1198
ENSG00000123684	LPGAT1	223.156172031414	0.328485	0.081584457404875	4.02632315082899	5.66558144059933e-05	0.00249729	ENST00000366997+ENST00000366996+ENST00000498690+ENST00000488600	protein_coding	16.0706
ENSG00000204160	ZDHHC18	81.6385549471445	-0.335458	0.1131879164703	-2.9637259036847	0.00303938880065002	0.0413205	ENST00000374142+ENST00000374141+ENST00000534643+ENST00000488397+ENST00000478902	protein_coding	16.0391
ENSG00000105245	NUMBL	54.0159273302235	-0.736532	0.142416698991202	-5.17166741697262	2.32014266419628e-07	3.40652e-05	ENST00000252891+ENST00000598779+ENST00000540131+ENST00000600967+ENST00000593367+ENST00000598773+ENST00000595741+ENST00000599786+ENST00000600636+ENST00000599594+ENST00000598759	protein_coding	16.0323
ENSG00000233426	EIF3FP3	11.9812721368498	0.617893	0.196095136308421	3.15098398075892	0.00162721414688572	0.0266922	ENST00000434851+ENST00000537260	pseduogene	16.0278
ENSG00000185608	MRPL40	28.4847062068853	0.706461	0.197347295970682	3.57978557624741	0.000343876262459079	0.00912147	ENST00000333130+ENST00000443660+ENST00000471259	protein_coding	15.9475
ENSG00000198431	TXNRD1	106.711645162654	0.388243	0.11660886016061	3.32944480841412	0.00087019308751777	0.0173614	ENST00000525566+ENST00000429002+ENST00000534282+ENST00000526006+ENST00000526266+ENST00000503506+ENST00000526691+ENST00000531691+ENST00000388854+ENST00000526390+ENST00000531689+ENST00000529546+ENST00000540716+ENST00000526207+ENST00000528079+ENST00000529784+ENST00000542918+ENST00000524698+ENST00000378070+ENST00000527688+ENST00000527335+ENST00000354940+ENST00000526580+ENST00000397736+ENST00000427956…	protein_coding	15.8833
ENSG00000167549	CORO6	49.826852913995	-0.664918	0.181922958566078	-3.65494473006273	0.000257237389123909	0.00745917	ENST00000445145+ENST00000388767+ENST00000469090+ENST00000345068+ENST00000459686+ENST00000580212+ENST00000467534+ENST00000579388+ENST00000480954+ENST00000456796+ENST00000584969+ENST00000577909+ENST00000492276+ENST00000584602	protein_coding	15.8115
ENSG00000227241	AC011998.4	3.2037294113429	0.64427	0.178333199561417	3.61273272334302	0.000302986966914445	0.00842263	ENST00000433403	pseduogene	15.8039
ENSG00000136720	HS6ST1	42.8098345433411	-0.365006	0.113715495163499	-3.20981946518626	0.00132818363441724	0.0233092	ENST00000469019+ENST00000259241+ENST00000494089+ENST00000463963	protein_coding	15.7981
ENSG00000160953	MUM1	84.0504005596675	-0.48577	0.112957357459639	-4.30047201229212	1.70434696628171e-05	0.00100949	ENST00000344663+ENST00000591806+ENST00000591433+ENST00000588810+ENST00000592374+ENST00000588351+ENST00000591337+ENST00000311401+ENST00000415183+ENST00000587460+ENST00000590866+ENST00000590695+ENST00000586996+ENST00000585399+ENST00000586067+ENST00000591627+ENST00000591453+ENST00000588888	protein_coding	15.6574
ENSG00000044115	CTNNA1	54.6708402624094	-0.517375	0.168583728559508	-3.06894755103779	0.00214814301068314	0.0321974	ENST00000517980+ENST00000522227+ENST00000524127+ENST00000523912+ENST00000520339+ENST00000355078+ENST00000521724+ENST00000302763+ENST00000519309+ENST00000519113+ENST00000520158+ENST00000518825+ENST00000518910+ENST00000518585+ENST00000521941+ENST00000518919+ENST00000523275+ENST00000522730+ENST00000517534+ENST00000520400+ENST00000518381+ENST00000522013+ENST00000520260+ENST00000523298+ENST00000520865…	protein_coding	15.6563
ENSG00000183248	CTD-3193O13.9	47.6624927647437	-0.623006	0.169712213517751	-3.67095621252077	0.00024164473985752	0.00718695	ENST00000539422+ENST00000599142+ENST00000593356	protein_coding	15.6169
ENSG00000107331	ABCA2	111.470813147374	-0.840815	0.142297831147987	-5.90883580315377	3.44533898453922e-09	1.28626e-06	ENST00000371605+ENST00000265662+ENST00000341511+ENST00000479446+ENST00000487109+ENST00000459850+ENST00000464520+ENST00000490486+ENST00000448336+ENST00000464157+ENST00000463603+ENST00000437791+ENST00000431584+ENST00000488535+ENST00000466707+ENST00000492260+ENST00000470535+ENST00000467624+ENST00000464876+ENST00000494046+ENST00000476211+ENST00000398207+ENST00000425423	protein_coding	15.6115
ENSG00000234036	TXNP6	7.69566067265391	0.448021	0.153113121995267	2.92608016487569	0.0034326247210728	0.0447572	ENST00000510190+ENST00000429255	pseduogene	15.4259
ENSG00000258645	HSPE1P2	8.24367304168233	0.655391	0.180158283435827	3.6378603428059	0.000274912416352162	0.00783691	ENST00000554777	pseduogene	15.4002
ENSG00000119718	EIF2B2	38.8355534370658	0.516845	0.172421246824325	2.99757103312349	0.00272140430096595	0.0381832	ENST00000266126+ENST00000555522+ENST00000553539+ENST00000556028+ENST00000553401+ENST00000554748+ENST00000556668	protein_coding	15.3781
ENSG00000107404	DVL1	67.7137843384858	-0.466779	0.136125305402262	-3.42904046340427	0.000605719215421972	0.013392	ENST00000378888+ENST00000378891+ENST00000472445	protein_coding	15.3734
ENSG00000137996	RTCA	66.1376185878697	0.409705	0.121246632515851	3.37910253153448	0.000727228804463125	0.0154242	ENST00000370128+ENST00000498617+ENST00000483474+ENST00000260563+ENST00000370126	protein_coding	15.3603
ENSG00000116786	PLEKHM2	90.0939828869152	-0.409225	0.129864482623082	-3.1511668011434	0.00162619590778313	0.0266922	ENST00000375799+ENST00000375793+ENST00000462455+ENST00000477849	protein_coding	15.3312
ENSG00000131089	ARHGEF9	94.4402228111754	-0.259811	0.0824515754453619	-3.15106843923537	0.00162674367281303	0.0266922	ENST00000374878+ENST00000253401+ENST00000374870+ENST00000437457+ENST00000433323+ENST00000495564+ENST00000374872+ENST00000466925+ENST00000498761	protein_coding	15.2708
ENSG00000105887	MTPN	48.9814261785508	-0.471238	0.107034342802657	-4.40267985527137	1.06921886197681e-05	0.000717707	ENST00000393085+ENST00000435723	protein_coding	15.2281
ENSG00000261069	SNORD116-20	9.87336091890477	-1.50294	0.276083563619981	-5.44379152830259	5.21582592969013e-08	1.0069e-05	ENST00000567527+ENST00000384529+ENST00000384507	lincRNA	15.2207
ENSG00000108797	CNTNAP1	108.267630086426	-0.325558	0.0878499015724947	-3.70584224916722	0.000210689410543254	0.0064598	ENST00000264638+ENST00000591662+ENST00000586801+ENST00000585534	protein_coding	15.2139
ENSG00000113504	SLC12A7	108.841060211759	-0.590068	0.173789960701796	-3.39529189211699	0.000685554693675054	0.0147841	ENST00000264930+ENST00000514994+ENST00000513223+ENST00000504576+ENST00000510943	protein_coding	15.2133
ENSG00000113649	TCERG1	86.671983900106	-0.497216	0.132578973939223	-3.75033659554122	0.000176597355878538	0.00562119	ENST00000507175+ENST00000296702+ENST00000394421+ENST00000549332+ENST00000513298+ENST00000510724+ENST00000509810+ENST00000515203+ENST00000506524+ENST00000505285+ENST00000504116+ENST00000509787+ENST00000514567+ENST00000514719+ENST00000503741+ENST00000511077	protein_coding	15.1851
ENSG00000108669	CYTH1	46.0949104997756	-0.740095	0.151721397679451	-4.87798759781854	1.07173661841164e-06	0.000114635	ENST00000361101+ENST00000589296+ENST00000446868+ENST00000591455+ENST00000589297+ENST00000585509+ENST00000586299+ENST00000586175+ENST00000591574+ENST00000586430+ENST00000590775+ENST00000589768+ENST00000586043+ENST00000587308+ENST00000590300+ENST00000591095+ENST00000592497	protein_coding	15.1798
ENSG00000141378	PTRH2	25.7079054726218	0.536805	0.176436660506488	3.0424801928693	0.00234637258656128	0.0342574	ENST00000587935+ENST00000393038+ENST00000537860+ENST00000409433+ENST00000579915+ENST00000470557	protein_coding	15.1666
ENSG00000050820	BCAR1	93.384633880219	-0.377877	0.13041359036066	-2.8975266575445	0.0037611777268811	0.0478319	ENST00000162330+ENST00000546196+ENST00000562556+ENST00000566982+ENST00000563038+ENST00000393422+ENST00000535626+ENST00000538440+ENST00000418647+ENST00000542031+ENST00000420641+ENST00000393420+ENST00000569340+ENST00000564170+ENST00000568864+ENST00000564028+ENST00000566465+ENST00000569006+ENST00000561970+ENST00000563323+ENST00000567215+ENST00000563700	protein_coding	15.1455
ENSG00000005007	UPF1	76.2532038392945	-0.43749	0.12022110533296	-3.63904846777096	0.000273647297817167	0.00781544	ENST00000262803+ENST00000599848+ENST00000601981+ENST00000594504+ENST00000600868+ENST00000600012+ENST00000598209+ENST00000600310+ENST00000598471+ENST00000601689+ENST00000594243+ENST00000596842+ENST00000600689	protein_coding	15.1014
ENSG00000127125	PPCS	30.3250623245711	0.534604	0.179064048960581	2.98554524147325	0.00283073261718105	0.0391625	ENST00000372562+ENST00000455780+ENST00000372560+ENST00000472013+ENST00000372561+ENST00000372556+ENST00000471420+ENST00000482168+ENST00000469615	protein_coding	15.0731
ENSG00000127481	UBR4	98.3141006374591	-0.548398	0.139285108591654	-3.93723429052157	8.24261212350493e-05	0.00320019	ENST00000375226+ENST00000375217+ENST00000375267+ENST00000375254+ENST00000375225+ENST00000429347+ENST00000375224+ENST00000459947+ENST00000486515+ENST00000543981+ENST00000492606+ENST00000467272+ENST00000483922+ENST00000494503+ENST00000466969+ENST00000375218+ENST00000425413+ENST00000417040+ENST00000475973+ENST00000465036+ENST00000419533+ENST00000497018	protein_coding	15.065
ENSG00000135972	MRPS9	34.8267575214032	0.533286	0.172824443545541	3.0857087156751	0.00203067648195896	0.0311754	ENST00000258455+ENST00000413583+ENST00000472220	protein_coding	15.0485
ENSG00000259385	RP11-605F22.1	0.258877606596453	0.907794	0.272733820454715	3.32849690351571	0.000873159756367606	0.0174039	ENST00000559875	antisense	15.0136
ENSG00000107859	PITX3	26.7006957930649	-0.809906	0.171252386052413	-4.72931355940121	2.25280224151591e-06	0.000207826	ENST00000539804+ENST00000370002	protein_coding	14.9855
ENSG00000115355	CCDC88A	151.062319110197	-0.37969	0.125021144234624	-3.03700514785662	0.00238941375074194	0.0346898	ENST00000263630+ENST00000336838+ENST00000436346+ENST00000422883+ENST00000444458+ENST00000412148+ENST00000413716+ENST00000426576+ENST00000456975+ENST00000474059+ENST00000476903+ENST00000468534+ENST00000430086+ENST00000471947	protein_coding	14.9821
ENSG00000177885	GRB2	40.2256091012874	0.464923	0.131657136906626	3.53131667272416	0.00041349638375945	0.0102999	ENST00000316615+ENST00000316804+ENST00000392562+ENST00000392564+ENST00000392563+ENST00000581959+ENST00000578961+ENST00000462266+ENST00000582582+ENST00000583912+ENST00000577711	protein_coding	14.9338
ENSG00000181524	RPL24P4	7.72806494620969	0.570286	0.194012157459251	2.93943521011104	0.00328811008070934	0.0436371	ENST00000326586	pseduogene	14.9104
ENSG00000228847	ATP5G2P4	12.8145214987901	0.706869	0.153731632588384	4.5980744430375	4.26413642885065e-06	0.000340624	ENST00000442175	pseduogene	14.6653
ENSG00000147457	CHMP7	50.2243042822409	-0.487733	0.127576844817865	-3.82305095096393	0.000131810529244417	0.00453485	ENST00000397677+ENST00000519414+ENST00000517325+ENST00000313219+ENST00000519529+ENST00000519984+ENST00000519503+ENST00000523091+ENST00000520102+ENST00000521656	protein_coding	14.6647
ENSG00000039523	FAM65A	57.4455886522533	-0.405089	0.129261264495672	-3.13387433277011	0.00172514720698713	0.0279035	ENST00000562116+ENST00000562755+ENST00000379312+ENST00000042381+ENST00000540839+ENST00000566907+ENST00000422602+ENST00000566920+ENST00000565176+ENST00000428437+ENST00000569253+ENST00000566559+ENST00000566815+ENST00000566522+ENST00000561534+ENST00000569474+ENST00000566730+ENST00000569179+ENST00000569733+ENST00000564616+ENST00000568959+ENST00000565190+ENST00000565679	protein_coding	14.5788
ENSG00000138138	ATAD1	121.179849765976	0.409223	0.101414510876294	4.03514944002011	5.45675557265154e-05	0.00242575	ENST00000308448+ENST00000328142+ENST00000400215+ENST00000541004+ENST00000495903	protein_coding	14.5256
ENSG00000172824	CES4A	19.0983303266687	-0.646167	0.204314672154903	-3.16260868197353	0.00156362358152978	0.0261847	ENST00000540947+ENST00000338718+ENST00000541479+ENST00000398354+ENST00000326686+ENST00000567587+ENST00000538199+ENST00000535543+ENST00000540579+ENST00000535696+ENST00000543561+ENST00000544986+ENST00000535948+ENST00000397205+ENST00000544478	protein_coding	14.5147
ENSG00000132780	NASP	27.0468271901923	-0.984606	0.23252458169957	-4.23441707578015	2.291453192732e-05	0.0012706	ENST00000437901+ENST00000437362+ENST00000464190+ENST00000527359+ENST00000528084+ENST00000402363+ENST00000537798+ENST00000453748+ENST00000525515+ENST00000527470+ENST00000529333+ENST00000531532+ENST00000530840+ENST00000528238+ENST00000350030+ENST00000534101+ENST00000470768+ENST00000372052+ENST00000351223+ENST00000530073+ENST00000481782+ENST00000531612+ENST00000527932+ENST00000534450+ENST00000472408	protein_coding	14.5028
ENSG00000114107	CEP70	39.9943302093197	0.450047	0.147000349333028	3.06153511413861	0.00220205161957582	0.0327699	ENST00000264982+ENST00000542237+ENST00000489254+ENST00000484888+ENST00000474781+ENST00000459695+ENST00000481834+ENST00000468900+ENST00000462419+ENST00000478673+ENST00000464035+ENST00000470159+ENST00000485115+ENST00000460967	protein_coding	14.4342
ENSG00000175182	FAM131A	45.294289669095	-0.405389	0.116548909184481	-3.478273738295	0.000504654279953828	0.0118297	ENST00000450976+ENST00000418281+ENST00000340957+ENST00000433578+ENST00000418768+ENST00000383847+ENST00000497070+ENST00000453072+ENST00000310585+ENST00000487702	protein_coding	14.3063
ENSG00000169490	TM2D2	74.7578541490874	0.424951	0.106444180587371	3.99224302636918	6.54512437629338e-05	0.00270216	ENST00000412303+ENST00000456397+ENST00000456845+ENST00000397070+ENST00000522434+ENST00000522142+ENST00000521060+ENST00000524331+ENST00000519186+ENST00000517872+ENST00000520152	protein_coding	14.0949
ENSG00000160194	NDUFV3	120.711058610203	0.507956	0.103602334045757	4.9029393528722	9.44131400519738e-07	0.000104703	ENST00000460259+ENST00000354250+ENST00000340344+ENST00000460740	protein_coding	14.0499
ENSG00000136295	TTYH3	83.0533443744637	-0.505842	0.117348927211824	-4.31058314467729	1.62824592210697e-05	0.000969923	ENST00000258796+ENST00000407643+ENST00000400376+ENST00000403167+ENST00000477439+ENST00000498454+ENST00000429448	protein_coding	14.0476
ENSG00000009335	UBE3C	107.456087663112	-0.30986	0.102981168104502	-3.00890043887927	0.00262195022429396	0.0371114	ENST00000348165+ENST00000389103+ENST00000430750+ENST00000469336+ENST00000470408+ENST00000497368+ENST00000494532+ENST00000474153	protein_coding	14.0446
ENSG00000123009	NME2P1	16.5441062268869	0.56685	0.121667044573032	4.65902947305054	3.17703716904166e-06	0.000266016	ENST00000242630+ENST00000426182	pseduogene	14.0021
ENSG00000234456	MAGI2-AS3	30.5042288194446	-0.614641	0.188651210010924	-3.25808130727283	0.00112168263176226	0.0207322	ENST00000429408+ENST00000426835+ENST00000446159+ENST00000414797+ENST00000422093+ENST00000451809+ENST00000448195+ENST00000424477+ENST00000435749+ENST00000448636+ENST00000452320+ENST00000442765	uncertain	13.8212
ENSG00000148926	ADM	47.1934560304176	0.630275	0.172925367640684	3.64478140070172	0.000267619174238257	0.00769599	ENST00000278175+ENST00000534464+ENST00000530439+ENST00000524948+ENST00000528655+ENST00000525063+ENST00000526492+ENST00000528544	protein_coding	13.8125
ENSG00000065150	IPO5	105.533727819595	0.335201	0.0924850801482684	3.62438402559879	0.000289650956405145	0.00814406	ENST00000460070+ENST00000482642+ENST00000261574+ENST00000481455+ENST00000471898+ENST00000463157+ENST00000490369+ENST00000493281+ENST00000489058+ENST00000481689+ENST00000480611+ENST00000485433+ENST00000496368+ENST00000421861+ENST00000357602+ENST00000475420+ENST00000480641+ENST00000490680+ENST00000539640+ENST00000497270+ENST00000403772+ENST00000469360+ENST00000473582+ENST00000470493+ENST00000491555…	protein_coding	13.7687
ENSG00000161544	CYGB	37.0245967717082	-0.655359	0.158030348593116	-4.14704743448824	3.36790307059509e-05	0.00169199	ENST00000293230+ENST00000586160+ENST00000589342+ENST00000590175+ENST00000589145	protein_coding	13.7053
ENSG00000135213	POM121C	22.5668888564101	-0.485933	0.14480671303694	-3.35573778939896	0.000791535770733316	0.0162749	ENST00000476072+ENST00000453279+ENST00000257665+ENST00000473609+ENST00000473168+ENST00000439629+ENST00000479864+ENST00000398379	protein_coding	13.6978
ENSG00000197747	S100A10	14.5740513774346	-0.998511	0.214574952495348	-4.65343823953678	3.26445411976554e-06	0.000270082	ENST00000368811+ENST00000368809+ENST00000478574+ENST00000478348	protein_coding	13.6617
ENSG00000233648	AC010095.6	4.23924351473867	0.992262	0.158897043367729	6.24468664627235	4.24650571934008e-10	2.45932e-07	ENST00000443543	pseduogene	13.6485
ENSG00000109519	GRPEL1	64.8622580938779	0.385552	0.126760404453079	3.0415769259577	0.00235342421195614	0.0342883	ENST00000264954+ENST00000504920+ENST00000509696+ENST00000514056	protein_coding	13.639
ENSG00000091436	MLTK	176.185935803578	0.406256	0.131450030706516	3.09057013593206	0.0019977261806583	0.0308981	ENST00000539448+ENST00000409176+ENST00000338983+ENST00000476618+ENST00000375213+ENST00000422149+ENST00000468408+ENST00000431503+ENST00000480606	protein_coding	13.6183
ENSG00000264350	SNRPGP2	6.58884335742772	0.606262	0.178390541448098	3.39851244134944	0.000677533812967174	0.0146686	ENST00000580909	pseduogene	13.5749
ENSG00000091483	FH	42.9420014576867	0.491446	0.157980013645586	3.11081282417485	0.00186573160576928	0.0295503	ENST00000366560+ENST00000497042+ENST00000493477	protein_coding	13.5225
ENSG00000146242	TPBG	137.767059393402	0.420587	0.134097463889738	3.13642777825025	0.00171019552396294	0.0277046	ENST00000535040+ENST00000369750+ENST00000543496	protein_coding	13.492
ENSG00000134996	OSTF1	33.4418985817299	0.43524	0.146677159399895	2.96733453979542	0.00300393915348939	0.0410145	ENST00000346234	protein_coding	13.4914
ENSG00000203709	C1orf132	83.233789550112	-0.694093	0.192215595274947	-3.61101176076378	0.000305004829125698	0.00845618	ENST00000608023+ENST00000385231+ENST00000385055+ENST00000487977+ENST00000415882	lincRNA	13.4899
ENSG00000229097	CALM2P2	13.0036230086017	1.21021	0.192515236549104	6.28629250185867	3.25137087983245e-10	1.9368e-07	ENST00000428512	pseduogene	13.4751
ENSG00000101473	ACOT8	34.762589017327	0.872048	0.174369461777679	5.00115258766496	5.69885851647812e-07	6.83459e-05	ENST00000217455+ENST00000461272+ENST00000488679+ENST00000493118+ENST00000484975+ENST00000483141+ENST00000487205+ENST00000484783+ENST00000486165+ENST00000481938+ENST00000457981+ENST00000426915	protein_coding	13.4746
ENSG00000137218	FRS3	39.3138408371762	-0.709791	0.147383740569085	-4.81593614545217	1.46511373587832e-06	0.000146533	ENST00000259748+ENST00000373018+ENST00000426290+ENST00000422888+ENST00000466420	protein_coding	13.4378
ENSG00000198785	GRIN3A	68.83791704524	-0.418697	0.139478614369829	-3.00187473861548	0.00268322559987952	0.0377894	ENST00000361820+ENST00000479772	protein_coding	13.3877
ENSG00000088538	DOCK3	188.486292966633	-0.342511	0.0880553358578179	-3.88972522048532	0.000100357791768857	0.00365797	ENST00000266037	protein_coding	13.3793
ENSG00000169740	ZNF32	21.9682580381489	0.600498	0.20498951841198	2.929408904811	0.0033960734037937	0.0445313	ENST00000374433+ENST00000395797+ENST00000485351	protein_coding	13.3572
ENSG00000104408	EIF3E	19.7459177789919	0.649908	0.140568271068194	4.62343394368988	3.77438973135318e-06	0.000308597	ENST00000523674+ENST00000220849+ENST00000522352+ENST00000519030+ENST00000521614+ENST00000519517+ENST00000519627+ENST00000519413+ENST00000522445+ENST00000523646+ENST00000521440+ENST00000518442+ENST00000518100+ENST00000522887+ENST00000521297+ENST00000518345+ENST00000518634+ENST00000522088	protein_coding	13.3223
ENSG00000268412	AC013449.1	9.75199064048166	0.775134	0.189270967382535	4.09536421139903	4.21505221821509e-05	0.00199781	ENST00000599234	protein_coding	13.259
ENSG00000177855	CACYBPP2	11.0830177378057	1.06179	0.256141647632309	4.14532145304499	3.3933732731706e-05	0.00170068	ENST00000453625	pseduogene	13.2562
ENSG00000166326	TRIM44	88.262588339513	0.568924	0.126260193590014	4.50596172395944	6.60729977720503e-06	0.000488495	ENST00000299413+ENST00000532066	protein_coding	13.2149
ENSG00000169057	MECP2	225.391817048234	-0.285057	0.0846019974594012	-3.36938715307892	0.000753355318980297	0.0158174	ENST00000303391+ENST00000453960+ENST00000407218+ENST00000486506+ENST00000369957+ENST00000496908+ENST00000415944+ENST00000460227+ENST00000463644+ENST00000481807+ENST00000488293	protein_coding	13.1507
ENSG00000159784	FAM131B	87.4878414149092	-0.363233	0.111052723350772	-3.27081575896309	0.00107237750269477	0.02	ENST00000443739+ENST00000409346+ENST00000409578+ENST00000410085+ENST00000409408+ENST00000409222+ENST00000519279+ENST00000521347+ENST00000519161	protein_coding	13.0849
ENSG00000149657	LSM14B	44.6658632863652	-0.537505	0.119484969033519	-4.49851565947819	6.84295568861908e-06	0.000497104	ENST00000253001+ENST00000370915+ENST00000400318+ENST00000279068+ENST00000279069+ENST00000361670	protein_coding	13.0364
ENSG00000099814	CEP170B	131.011477599296	-0.447709	0.115375704073104	-3.88044863458997	0.000104263963602471	0.0037609	ENST00000556508+ENST00000453495+ENST00000414716+ENST00000418279+ENST00000251181	protein_coding	12.9914
ENSG00000163832	ELP6	37.8836696400453	0.548553	0.160187261528003	3.42444982381008	0.000616045593284167	0.0135771	ENST00000296149+ENST00000442215+ENST00000446787+ENST00000439305+ENST00000412761+ENST00000444760+ENST00000445044+ENST00000461208+ENST00000425291+ENST00000494161+ENST00000449409+ENST00000414236+ENST00000485029+ENST00000483205+ENST00000460502	protein_coding	12.9577
ENSG00000151929	BAG3	81.3841082770581	0.74967	0.198451857006791	3.77759256695	0.000158351656449242	0.00520593	ENST00000369085+ENST00000450186	protein_coding	12.9252
ENSG00000133657	ATP13A3	104.979128637091	-0.475329	0.154159344861863	-3.08336232277454	0.00204675791545978	0.031277	ENST00000439040+ENST00000429136+ENST00000256031+ENST00000461660+ENST00000497567+ENST00000484023+ENST00000485194+ENST00000492983+ENST00000457986+ENST00000446356	protein_coding	12.9233
ENSG00000135503	ACVR1B	93.9486764387558	-0.350848	0.118802910273624	-2.95319326400376	0.00314504994082437	0.0423882	ENST00000257963+ENST00000541224+ENST00000426655+ENST00000536420+ENST00000415850+ENST00000542485+ENST00000563121	protein_coding	12.8873
ENSG00000070061	IKBKAP	100.237547673689	0.408519	0.128576326182163	3.17724850681685	0.00148679577599493	0.0253724	ENST00000374647+ENST00000495759+ENST00000537196+ENST00000467959	protein_coding	12.777
ENSG00000100239	PPP6R2	73.937899493383	-0.454189	0.104713268128402	-4.3374549484125	1.44142067262372e-05	0.0008937	ENST00000359139+ENST00000395741+ENST00000395744+ENST00000216061+ENST00000401672+ENST00000427222+ENST00000473283+ENST00000470046	protein_coding	12.7719
ENSG00000148296	SURF6	47.3421303744288	-0.476661	0.127846402392271	-3.72838519272798	0.000192710666380458	0.00606007	ENST00000372022+ENST00000468290	protein_coding	12.7432
ENSG00000170745	KCNS3	57.2753953459983	0.52265	0.153715333027153	3.40011508819605	0.00067357495907642	0.0145981	ENST00000403915+ENST00000481414+ENST00000304101+ENST00000465292+ENST00000419802	protein_coding	12.7128
ENSG00000132600	PRMT7	27.6721806354165	-0.69906	0.178540391312117	-3.91541870531253	9.02474504853365e-05	0.00339119	ENST00000562381+ENST00000566657+ENST00000565745+ENST00000569571+ENST00000566341+ENST00000564050+ENST00000449359+ENST00000569047+ENST00000564441+ENST00000565356+ENST00000562050+ENST00000563520+ENST00000565983+ENST00000348497+ENST00000441236+ENST00000339507+ENST00000568975+ENST00000563562+ENST00000561806+ENST00000562456+ENST00000566430+ENST00000567542+ENST00000563443+ENST00000565761+ENST00000566687…	protein_coding	12.7099
ENSG00000103091	WDR59	37.2392732952682	-0.511158	0.155026775991008	-3.29722448836386	0.000976454216848351	0.0188059	ENST00000262144+ENST00000569183+ENST00000569968+ENST00000563797+ENST00000567018+ENST00000569788+ENST00000563381+ENST00000569229+ENST00000566924+ENST00000570070+ENST00000569115+ENST00000562371+ENST00000569549+ENST00000536050+ENST00000562539+ENST00000562854+ENST00000561717+ENST00000568462+ENST00000568323+ENST00000563111+ENST00000562331+ENST00000564859+ENST00000569421	protein_coding	12.684
ENSG00000234925	RP11-254B13.3	11.9671573778126	0.587549	0.161437900529353	3.63947173378353	0.000273197922771593	0.00781331	ENST00000414313	pseduogene	12.6414
ENSG00000163900	TMEM41A	39.8810317622504	0.457219	0.155943363805846	2.93195787587772	0.00336832430987541	0.0442601	ENST00000382227+ENST00000475480+ENST00000421852+ENST00000296254+ENST00000467061+ENST00000467520+ENST00000484062	protein_coding	12.6245
ENSG00000145912	NHP2	8.89055782975776	0.718147	0.230782720333092	3.11178849847051	0.00185957674642978	0.0294831	ENST00000274606+ENST00000502263+ENST00000514354+ENST00000511078+ENST00000314397+ENST00000510363	protein_coding	12.6169
ENSG00000226970	RP11-82H13.2	4.16709279273748	0.744232	0.194915919562926	3.81821952457178	0.000134418290467877	0.00458672	ENST00000441775	pseduogene	12.5909
ENSG00000242013	USP27X	52.6855101446857	-0.405821	0.109399003560708	-3.7095489036708	0.000207628851177124	0.00639417	ENST00000508866	protein_coding	12.5341
ENSG00000250571	GLI4	10.3700977466704	-0.737763	0.223579925858491	-3.29977248483169	0.000967632400205099	0.0187667	ENST00000519876+ENST00000522479+ENST00000340042+ENST00000521682+ENST00000523522+ENST00000517468+ENST00000344692+ENST00000520021+ENST00000517530+ENST00000523812+ENST00000522033	protein_coding	12.5277
ENSG00000153253	SCN3A	162.731791989862	-0.28034	0.0864976523753729	-3.24101831827802	0.00119103530051632	0.0216306	ENST00000360093+ENST00000283254+ENST00000409101+ENST00000540861+ENST00000465043+ENST00000471697+ENST00000440431+ENST00000484898+ENST00000453007	protein_coding	12.4743
ENSG00000229828	RP11-94I2.1	3.33612639777513	-1.90285	0.255557067820297	-7.44587608943054	9.6303164856311e-14	2.00782e-10	ENST00000420737	pseduogene	12.4537
ENSG00000126773	PCNXL4	43.3847426474457	-0.539485	0.16576251958051	-3.25456488417238	0.00113566214797795	0.0209349	ENST00000317623+ENST00000406854+ENST00000391611+ENST00000406949+ENST00000556907+ENST00000555569+ENST00000404681+ENST00000483571+ENST00000553513+ENST00000554534+ENST00000535349+ENST00000555740+ENST00000555929+ENST00000556360+ENST00000553898	protein_coding	12.4107
ENSG00000116396	KCNC4	57.3029524024845	-0.538463	0.156422194569961	-3.44236758678207	0.000576646093090624	0.0129413	ENST00000469655+ENST00000489935+ENST00000369787+ENST00000413138+ENST00000438661+ENST00000412512+ENST00000459877	protein_coding	12.3606
ENSG00000116983	HPCAL4	93.6156105552895	-0.344581	0.110495684621342	-3.11850039705656	0.00181773897061892	0.0290896	ENST00000372844	protein_coding	12.304
ENSG00000160678	S100A1	5.89958276875446	-0.882883	0.218078692750795	-4.0484586676241	5.15560364079886e-05	0.00232158	ENST00000368698+ENST00000469893+ENST00000292169+ENST00000368696+ENST00000436839	protein_coding	12.2405
ENSG00000124784	RIOK1	34.8777661926088	-0.468907	0.16271892535664	-2.88169983564376	0.00395536331988659	0.0495585	ENST00000379834+ENST00000475351+ENST00000264874+ENST00000484626+ENST00000493691	protein_coding	12.2288
ENSG00000133805	AMPD3	66.8933402665456	-0.390958	0.130550963323715	-2.99468016063558	0.00274732756428758	0.0383908	ENST00000527261+ENST00000532250+ENST00000295663+ENST00000532966+ENST00000527369+ENST00000444303+ENST00000529835+ENST00000396554+ENST00000524866+ENST00000534047+ENST00000396553+ENST00000529834+ENST00000528723+ENST00000529507+ENST00000531227+ENST00000533116+ENST00000530864+ENST00000529744	protein_coding	12.2093
ENSG00000197562	RAB40C	40.2103192345877	-0.481411	0.15317217652343	-3.1429431606522	0.00167258315063304	0.0272588	ENST00000535977+ENST00000569575+ENST00000539661+ENST00000566290+ENST00000568586+ENST00000538492+ENST00000248139+ENST00000565511+ENST00000509637+ENST00000563109+ENST00000564703+ENST00000561781	protein_coding	12.1652
ENSG00000147471	PROSC	62.3178811613456	0.568733	0.119724597323109	4.75034321822177	2.03071686081131e-06	0.000189011	ENST00000328195+ENST00000520073+ENST00000523187+ENST00000523358+ENST00000518036+ENST00000523994+ENST00000523521+ENST00000521631+ENST00000522808	protein_coding	12.1365
ENSG00000115539	PDCL3	19.7047320336993	0.462847	0.159641158308847	2.89929318334063	0.00374004992821212	0.0476046	ENST00000264254+ENST00000416255+ENST00000450127	protein_coding	12.1309
ENSG00000184599	FAM19A3	28.6368021360991	0.719688	0.217864641874304	3.30337247217653	0.000955294088587287	0.0186016	ENST00000369630+ENST00000361886	protein_coding	12.1201
ENSG00000178188	SH2B1	50.7942219956053	-0.374266	0.127089356283777	-2.94490596410526	0.00323052830976243	0.0430923	ENST00000563591+ENST00000567536+ENST00000322610+ENST00000337120+ENST00000566209+ENST00000545570+ENST00000359285+ENST00000395532+ENST00000538342+ENST00000566176+ENST00000569471+ENST00000561629+ENST00000569651+ENST00000568868+ENST00000563674	protein_coding	12.06
ENSG00000103269	RHBDL1	23.2844218864104	-0.711397	0.193038713814421	-3.68525306599998	0.000228475507437972	0.00681472	ENST00000352681+ENST00000561556+ENST00000450775+ENST00000219551	protein_coding	12.053
ENSG00000259425	RP11-566K19.5	34.9366626837953	-1.07558	0.2253894236842	-4.77211121932384	1.82304780696946e-06	0.000172767	ENST00000559762+ENST00000559740+ENST00000560434+ENST00000558417	uncertain	12.0002
ENSG00000160318	CLDND2	6.69158722383475	-0.617614	0.209465781020156	-2.94851943572626	0.00319300061390766	0.0428108	ENST00000291715+ENST00000601435+ENST00000593841	protein_coding	11.941
ENSG00000103202	NME4	17.8697011494611	-0.990801	0.226072282761056	-4.38267368098898	1.17231640378552e-05	0.000754371	ENST00000397722+ENST00000454619+ENST00000448828+ENST00000444498+ENST00000460297+ENST00000219479+ENST00000382940+ENST00000433358+ENST00000450036+ENST00000468031	protein_coding	11.9014
ENSG00000080189	SLC35C2	27.3823166931741	-0.608532	0.171473820576357	-3.54883374785279	0.000386941299115664	0.00981428	ENST00000317734+ENST00000243896+ENST00000372230+ENST00000372229+ENST00000372227+ENST00000493599+ENST00000543605+ENST00000480329+ENST00000487729+ENST00000484318+ENST00000481809+ENST00000420518+ENST00000424568+ENST00000484188	protein_coding	11.8986
ENSG00000189221	MAOA	77.5305850405655	-0.701467	0.193073174602848	-3.6331675371314	0.000279963106824705	0.00795225	ENST00000338702+ENST00000542639+ENST00000497485+ENST00000490604	protein_coding	11.8572
ENSG00000099904	ZDHHC8	55.1414317426291	-0.554721	0.155075233453193	-3.57710809322355	0.000347416535169916	0.00915713	ENST00000436518+ENST00000334554+ENST00000405930+ENST00000320602+ENST00000468112+ENST00000469212+ENST00000472497	protein_coding	11.8198
ENSG00000231234	SKP1P1	11.0431331623625	0.904723	0.171234675330371	5.28352463892892	1.26721811427472e-07	2.06408e-05	ENST00000438081+ENST00000433793	pseduogene	11.7689
ENSG00000104691	UBXN8	31.7566426578225	0.731135	0.163927542805028	4.46010934242225	8.19178490325745e-06	0.00056741	ENST00000522735+ENST00000519246+ENST00000522968+ENST00000517341+ENST00000341403+ENST00000265616+ENST00000523607+ENST00000518059+ENST00000518239+ENST00000380154+ENST00000521598+ENST00000520436	uncertain	11.7248
ENSG00000167632	TRAPPC9	61.7281316263496	-0.566512	0.11185762156954	-5.06457857997468	4.09304780043855e-07	5.30037e-05	ENST00000389327+ENST00000389328+ENST00000438773+ENST00000520857+ENST00000521667+ENST00000522504+ENST00000521700+ENST00000519482+ENST00000524162+ENST00000523777+ENST00000517667+ENST00000520532+ENST00000518839+ENST00000521167+ENST00000521944+ENST00000518723	protein_coding	11.6824
ENSG00000172201	ID4	47.7388040468946	-0.689183	0.201547287380239	-3.41946082027868	0.000627453676030224	0.0137703	ENST00000378700	protein_coding	11.6486
ENSG00000113758	DBN1	54.2830731147223	-0.492061	0.132960351804674	-3.7008081828936	0.000214913892272921	0.00654123	ENST00000309007+ENST00000292385+ENST00000472831+ENST00000393565+ENST00000393563+ENST00000512501+ENST00000467054+ENST00000477391+ENST00000471767+ENST00000506117+ENST00000514833+ENST00000505550	protein_coding	11.6424
ENSG00000062725	APPBP2	115.166773778465	-0.347396	0.116110661311757	-2.99193823660989	0.00277212341461527	0.0386079	ENST00000083182+ENST00000589341+ENST00000592995+ENST00000590244+ENST00000588668+ENST00000585368	protein_coding	11.6144
ENSG00000162512	SDC3	108.205951454192	-0.643113	0.111880569341326	-5.74820896865618	9.01937268174316e-09	2.57596e-06	ENST00000336798+ENST00000339394+ENST00000471567+ENST00000487984	protein_coding	11.5443
ENSG00000169710	FASN	107.722540732049	-0.333503	0.108311405266292	-3.07911097474941	0.00207619327906453	0.031504	ENST00000306749+ENST00000584610+ENST00000580382+ENST00000579758+ENST00000578424+ENST00000579410	protein_coding	11.5228
ENSG00000079313	REXO1	10.5789567220001	-0.849177	0.258136589355977	-3.28964317178439	0.00100314507690376	0.0191877	ENST00000170168+ENST00000587404+ENST00000586291+ENST00000590936+ENST00000588743+ENST00000586343+ENST00000587524	protein_coding	11.4799
ENSG00000185189	NRBP2	57.2559866662606	-0.698432	0.157715591946933	-4.42842926275409	9.49218394907151e-06	0.000650995	ENST00000533093+ENST00000529747+ENST00000442628+ENST00000423469+ENST00000327830+ENST00000527545+ENST00000530123+ENST00000533846+ENST00000532940+ENST00000531729+ENST00000530347	protein_coding	11.2735
ENSG00000168005	C11orf84	33.880303983235	-0.478558	0.132005532620038	-3.62528678407849	0.000288640958499948	0.00813226	ENST00000294244+ENST00000540893+ENST00000535820	protein_coding	11.1878
ENSG00000173545	ZNF622	41.0733553439649	0.773255	0.166051404944823	4.65672242646641	3.21283143761395e-06	0.000267937	ENST00000308683	protein_coding	11.1754
ENSG00000228236	TXNP5	6.76982038830208	0.848957	0.177729696640064	4.77667286932934	1.7821934772305e-06	0.000169666	ENST00000441043	pseduogene	11.0665
ENSG00000110786	PTPN5	35.6025894378303	-0.973878	0.175793598244345	-5.53989326078171	3.02656061710294e-08	6.64219e-06	ENST00000358540+ENST00000477854+ENST00000396167+ENST00000396171+ENST00000396170+ENST00000396166+ENST00000396168+ENST00000496201	protein_coding	11.0156
ENSG00000142459	EVI5L	62.6316457405731	-0.633011	0.141611221181917	-4.4700638242867	7.81962590369123e-06	0.000554529	ENST00000270530+ENST00000538904+ENST00000597440+ENST00000599036+ENST00000601984+ENST00000600802+ENST00000601766	protein_coding	10.9587
ENSG00000169992	NLGN2	75.9422772592355	-0.45999	0.104821491481922	-4.38831609839133	1.14231667996313e-05	0.000752395	ENST00000575301+ENST00000572893+ENST00000302926+ENST00000570940	protein_coding	10.9519
ENSG00000134363	FST	29.3605388755374	0.866567	0.218576292516238	3.96459963150079	7.35192360194798e-05	0.00293962	ENST00000256759+ENST00000396947+ENST00000491717+ENST00000504226+ENST00000497789	protein_coding	10.9513
ENSG00000005700	IBTK	52.1630386213821	-0.667784	0.179821687576739	-3.7135910312413	0.000204338915571311	0.00633026	ENST00000306270+ENST00000505222+ENST00000508381+ENST00000445419+ENST00000503400+ENST00000503631+ENST00000510291+ENST00000471036+ENST00000369751	protein_coding	10.933
ENSG00000179933	C14orf119	63.29471267575	0.448472	0.138621397888249	3.23523202781337	0.00121543915882908	0.0218561	ENST00000319074+ENST00000554203	protein_coding	10.7151
ENSG00000160392	C19orf47	16.5004122760611	-0.623423	0.212514363189062	-2.93355724164074	0.0033510185663898	0.0441906	ENST00000582783+ENST00000392035+ENST00000577617+ENST00000582734+ENST00000584868+ENST00000357884+ENST00000582006+ENST00000580606+ENST00000580977	protein_coding	10.7147
ENSG00000165775	FUNDC2	53.7672045148528	0.448511	0.141940945394611	3.15984356645283	0.00157853867822378	0.0262657	ENST00000475165+ENST00000369498+ENST00000484175+ENST00000485289+ENST00000456179+ENST00000471528+ENST00000492303	protein_coding	10.7059
ENSG00000256618	MTRNR2L1	1745.17702067594	4.37355	0.266622131204411	16.4035566245861	1.80362509259339e-60	3.76038e-56	ENST00000540040	protein_coding	10.6799
ENSG00000185049	NELFA	26.9364646905771	-0.657975	0.180636187811442	-3.64254142643228	0.000269959515187179	0.0077526	ENST00000382882+ENST00000411638+ENST00000467661+ENST00000542778+ENST00000333877+ENST00000416258+ENST00000463820+ENST00000453740+ENST00000431323+ENST00000455762+ENST00000488452+ENST00000421397+ENST00000484545+ENST00000411649+ENST00000443203+ENST00000458616	protein_coding	10.5448
ENSG00000156709	AIFM1	29.3151768207055	0.526522	0.174437660651744	3.01839911870311	0.0025411399076995	0.0363112	ENST00000535724+ENST00000440263+ENST00000319908+ENST00000346424+ENST00000527892+ENST00000416073+ENST00000460436+ENST00000287295+ENST00000533719+ENST00000529877	protein_coding	10.5244
ENSG00000175426	PCSK1	102.38070663068	0.437938	0.146700917049581	2.98524136400109	0.00283354644750517	0.0391755	ENST00000311106+ENST00000513085+ENST00000508626+ENST00000509190	protein_coding	10.4981
ENSG00000261675	RP5-1119A7.17	32.3393842160795	-0.597001	0.149319633590352	-3.99813927024498	6.38423852002747e-05	0.00267817	ENST00000562756	sense_overlapping	10.4888
ENSG00000261612	SUB1P3	6.99869808889586	0.759623	0.186038147500184	4.08315923212893	4.44275586372498e-05	0.00208151	ENST00000564581	pseduogene	10.4867
ENSG00000137168	PPIL1	28.4494579545851	0.647133	0.157783941745357	4.10138792153238	4.10679411999247e-05	0.00196382	ENST00000373699+ENST00000483552	protein_coding	10.4439
ENSG00000142185	TRPM2	76.7053349242321	-0.659146	0.145781718526634	-4.52145762841313	6.1415254361068e-06	0.000462255	ENST00000300482+ENST00000431901+ENST00000397928+ENST00000300481+ENST00000397932+ENST00000498430+ENST00000490982	protein_coding	10.4367
ENSG00000143155	TIPRL	34.1226707846142	0.644889	0.152668753857317	4.22410682699323	2.39890248185024e-05	0.00130929	ENST00000367833+ENST00000367830	protein_coding	10.4245
ENSG00000225485	ARHGAP23	86.8619435986857	-0.410185	0.129681441399722	-3.16302200757548	0.00156140527534754	0.0261686	ENST00000431231+ENST00000437668+ENST00000582409+ENST00000443378+ENST00000549246+ENST00000548333+ENST00000581782+ENST00000578665+ENST00000548703+ENST00000581023+ENST00000547158+ENST00000583703	protein_coding	10.3688
ENSG00000106009	BRAT1	31.827735055533	-0.817877	0.162171003871731	-5.04329711445289	4.57577902496024e-07	5.83725e-05	ENST00000340611+ENST00000469750+ENST00000467558+ENST00000493232+ENST00000473879+ENST00000421712	protein_coding	10.297
ENSG00000171302	CANT1	42.8153695151408	-0.495696	0.146787317427697	-3.37696922613787	0.000732892492674587	0.015497	ENST00000302345+ENST00000392446+ENST00000592228+ENST00000591773+ENST00000588096+ENST00000588611+ENST00000588075+ENST00000590370+ENST00000586916+ENST00000591811+ENST00000592033+ENST00000591625+ENST00000592887+ENST00000587242+ENST00000591732	protein_coding	10.2441
ENSG00000181409	AATK	29.7929088443026	-0.952669	0.149959925339742	-6.35282647640901	2.11394136898391e-10	1.3773e-07	ENST00000326724+ENST00000374792+ENST00000570932+ENST00000417379+ENST00000573469+ENST00000573441+ENST00000572339+ENST00000576053+ENST00000575363+ENST00000572798	protein_coding	10.19
ENSG00000124098	FAM210B	44.8460257780365	-0.511674	0.169113682091136	-3.02562143885666	0.00248122743005973	0.0356275	ENST00000371384+ENST00000437418	protein_coding	10.1672
ENSG00000095397	DFNB31	39.8032425320686	-0.435239	0.150731187624919	-2.88751752461494	0.00388294974858831	0.0489826	ENST00000265134+ENST00000362057+ENST00000374059+ENST00000374057+ENST00000480518	protein_coding	10.0995
ENSG00000127419	TMEM175	36.8265719470564	-0.503591	0.139697097959096	-3.60487938852383	0.000312297929778168	0.00858984	ENST00000264771+ENST00000507319+ENST00000513952+ENST00000514453+ENST00000505734+ENST00000515492+ENST00000504744+ENST00000452360+ENST00000509508+ENST00000515876+ENST00000513682+ENST00000515740+ENST00000438836+ENST00000504505+ENST00000508204+ENST00000510493+ENST00000514546+ENST00000504850+ENST00000504180+ENST00000502513+ENST00000506669	protein_coding	10.0813
ENSG00000076108	BAZ2A	89.7165157620488	-0.389431	0.113700689109756	-3.42505565411104	0.000614673492388997	0.0135612	ENST00000179765+ENST00000379441+ENST00000551812+ENST00000549787+ENST00000549884+ENST00000553222+ENST00000547453+ENST00000551759+ENST00000549763+ENST00000548578+ENST00000547650+ENST00000551996+ENST00000549327+ENST00000547647+ENST00000551959+ENST00000546695+ENST00000549506+ENST00000550730	protein_coding	10.0464
ENSG00000136237	RAPGEF5	91.2492092375003	-0.351131	0.120085853560407	-2.92400104461603	0.00345563587081143	0.0449168	ENST00000401957+ENST00000344041+ENST00000488366+ENST00000468825+ENST00000458533+ENST00000451559+ENST00000420196+ENST00000475788+ENST00000405243+ENST00000471484+ENST00000497668	protein_coding	10.038
ENSG00000124574	ABCC10	11.8466143127541	-0.754629	0.239668784602281	-3.14863342248712	0.00164035822618901	0.0268444	ENST00000372515+ENST00000372530+ENST00000443426+ENST00000244533+ENST00000463024+ENST00000469856+ENST00000502549+ENST00000372512+ENST00000437104+ENST00000505344	protein_coding	9.96395
ENSG00000007047	MARK4	60.4861957216184	-0.622193	0.132562566057804	-4.69358205296487	2.6846223829905e-06	0.000234191	ENST00000587566+ENST00000262891+ENST00000300843+ENST00000590909+ENST00000588533+ENST00000588621+ENST00000592762+ENST00000592207+ENST00000590897	protein_coding	9.93094
ENSG00000076984	MAP2K7	41.8602184459226	-0.531639	0.161221302157702	-3.29757425443475	0.000975238842721672	0.0188059	ENST00000397981+ENST00000545011+ENST00000468058+ENST00000397983+ENST00000397979+ENST00000475022+ENST00000494348+ENST00000465324+ENST00000498118	protein_coding	9.86426
ENSG00000138593	SECISBP2L	99.1973723310165	-0.441176	0.112629801075872	-3.91704237297135	8.96419971212514e-05	0.00338394	ENST00000561428+ENST00000559471+ENST00000261847+ENST00000380927+ENST00000559122+ENST00000559198+ENST00000561203+ENST00000557940+ENST00000559424+ENST00000558461+ENST00000557923	protein_coding	9.84802
ENSG00000091527	CDV3	51.9756385899248	0.380309	0.131499461814672	2.89209443674049	0.00382682899956789	0.0484724	ENST00000264993+ENST00000431519+ENST00000503932+ENST00000508481+ENST00000420115+ENST00000504867+ENST00000511392+ENST00000507408+ENST00000515421	protein_coding	9.77958
ENSG00000144848	ATG3	55.0327468906653	0.515286	0.14630314964275	3.52204249899559	0.000428235486065138	0.010556	ENST00000283290+ENST00000402314+ENST00000494571+ENST00000495756+ENST00000467275+ENST00000496423+ENST00000492886+ENST00000465980+ENST00000488910	protein_coding	9.70891
ENSG00000061936	SFSWAP	45.7494304731804	-0.479462	0.149400653439586	-3.20923302740532	0.00133089579612464	0.0233371	ENST00000540469+ENST00000261674+ENST00000538548+ENST00000535399+ENST00000535236+ENST00000541286+ENST00000542813+ENST00000535202+ENST00000537164+ENST00000539506+ENST00000537582	protein_coding	9.66584
ENSG00000152377	SPOCK1	74.9380455612772	-0.644382	0.212070491749061	-3.0385257071332	0.00237738820095754	0.0345891	ENST00000394945+ENST00000515091+ENST00000282223+ENST00000509978+ENST00000508642+ENST00000510689+ENST00000510405+ENST00000505690+ENST00000503916+ENST00000509293	protein_coding	9.65479
ENSG00000233270	SNRPEP4	2.69767395675732	0.79099	0.219017537145106	3.61153559816493	0.000304389291174395	0.00845035	ENST00000435815	pseduogene	9.63947
ENSG00000198522	GPN1	26.2041769872104	0.585682	0.171694307169837	3.41118914533937	0.000646802061548699	0.0141058	ENST00000515877+ENST00000481754+ENST00000424214+ENST00000458167+ENST00000503738+ENST00000407583+ENST00000264718+ENST00000436280+ENST00000610189+ENST00000461249+ENST00000478484	protein_coding	9.62051
ENSG00000053900	ANAPC4	29.9398135058743	-0.731866	0.201699647013032	-3.62849338423532	0.000285080054208729	0.00807825	ENST00000315368+ENST00000510092+ENST00000505080+ENST00000505991+ENST00000507809+ENST00000507925+ENST00000503805+ENST00000505842+ENST00000504256+ENST00000515848+ENST00000506973	protein_coding	9.55943
ENSG00000187091	PLCD1	10.3373080852443	-0.883781	0.268756715325521	-3.28840469270217	0.00100756892275803	0.0192315	ENST00000461445+ENST00000417185+ENST00000334661+ENST00000463876+ENST00000495395+ENST00000484829+ENST00000495367+ENST00000479619+ENST00000473834	protein_coding	9.55438
ENSG00000197860	SGTB	92.0822882706533	0.514529	0.110626462999634	4.65105144952716	3.3024691810037e-06	0.000272147	ENST00000381007+ENST00000506816	protein_coding	9.5518
ENSG00000160360	GPSM1	26.8180340492741	-0.731159	0.185096682373671	-3.95014457292383	7.81040017589645e-05	0.00306088	ENST00000440944+ENST00000392945+ENST00000354753+ENST00000429455+ENST00000392944+ENST00000291775	protein_coding	9.51648
ENSG00000178464	CTD-2192J16.15	6.07802721404782	0.534838	0.16856584649453	3.17287040525737	0.00150939883159683	0.0256094	ENST00000325000	pseduogene	9.47539
ENSG00000152465	NMT2	27.2788311615107	-0.504138	0.147058998330505	-3.42813691300481	0.000607738878506618	0.0134224	ENST00000466201+ENST00000486786+ENST00000378165+ENST00000378150+ENST00000540259+ENST00000535341+ENST00000478580	protein_coding	9.31294
ENSG00000069535	MAOB	34.2568536377733	-0.661741	0.229130084026999	-2.88805723068625	0.00387629337089862	0.0489502	ENST00000378069+ENST00000536181+ENST00000538942+ENST00000487544+ENST00000468431	protein_coding	9.30008
ENSG00000074054	CLASP1	107.873825859147	-0.275451	0.0898685453651862	-3.06504267215417	0.00217638942512359	0.0325506	ENST00000409078+ENST00000541859+ENST00000541377+ENST00000397587+ENST00000455322+ENST00000263710+ENST00000545861+ENST00000452274+ENST00000472776+ENST00000463621+ENST00000430234+ENST00000491646+ENST00000418989+ENST00000449975+ENST00000474065+ENST00000480007+ENST00000485112	protein_coding	9.27592
[truncated: 568 more rows]
